# Supplementary material for: Efficient synthesis of ynones from carboxylic acids and terminal alkynes via Pd/Cu catalysis using 2-chloroimidazolium chloride as the activation reagent
Source: Royal Society of Chemistry journal article supplement (doi:10.1039/d3nj02316h), 2023-01-01

## Electronic Supplementary Information

### Efficient Synthesis of Ynones from Carboxylic Acids and Terminal Alkynes via Pd/Cu Catalysis using 2-Chloroimidazolium Chloride

Weixiang Zheng,<sup>1,3,4,†</sup> Nengde Liang,<sup>1,†</sup> Yi Fu,<sup>1</sup> Jing Zhong,<sup>1</sup> Yan Zhang,<sup>1,\*</sup> Li Wang,<sup>1</sup>  
Yuanhua Wang,<sup>2,\*</sup> and Qiwei Wang,<sup>1,4,5,\*</sup>

<sup>1</sup> Department of Chemistry, Xihua University, Chengdu, 610039, China.

<sup>2</sup> College of Chemistry, Sichuan University, Chengdu, 610041, China.

<sup>3</sup> Chengdu Institute of Organic Chemistry, Chinese Academy of Sciences, Chengdu, 610041, China.

<sup>4</sup> University of Chinese Academy of Sciences, Beijing, 100049, China.

<sup>5</sup> Asymmetric Synthesis and Chiral technology Key Laboratory of Sichuan Province, Research and Application of Small Organic Chiral Molecules Key Laboratory of Yibin City, Department of Chemistry, Xihua University.

<sup>†</sup>These authors contributed equally to this work.

Correspondence to: [swallowlgf@mail.xhu.edu.cn](mailto:swallowlgf@mail.xhu.edu.cn); [wqw@cioc.ac.cn](mailto:wqw@cioc.ac.cn) (Q.W.);

[yhwang@scu.edu.cn](mailto:yhwang@scu.edu.cn) (Y.W.)

### Table of Contents

|   |                                                                                        |     |
|---|----------------------------------------------------------------------------------------|-----|
| 1 | General experimental details                                                           | S1  |
| 2 | General procedure for the Synthesis of Ynones ( <b>3aa-3fa</b> )                       | S1  |
| 3 | General procedure for the Synthesis of Ynones ( <b>3ab-3ao</b> )                       | S1  |
| 4 | Table S1, S2, S3 and S4                                                                | S2  |
| 5 | Characterization Data of Isolated Products                                             | S4  |
| 6 | Reference                                                                              | S22 |
| 7 | Copies of <sup>1</sup> H NMR, <sup>19</sup> F NMR and <sup>13</sup> C NMR of Compounds | S26 |

## 1. General experimental details

All air- and moisture-sensitive reactions were carried out under an atmosphere of argon, magnetically stirred, and monitored by thin layer chromatography (TLC). IPrCl-Cl was prepared as described.<sup>1</sup> Unless otherwise noted, all reagents were obtained from commercial suppliers and used without further purification. The NHC precursors were dried under vacuum before use. NMR spectra were recorded on either Bruker 300 spectrometer operating at 300 MHz and 75 MHz for <sup>1</sup>H acquisition and <sup>13</sup>C acquisitions. Chemical shifts were referenced to the residual proton solvent peak (<sup>1</sup>H: CDCl<sub>3</sub>, δ 7.26; (CD<sub>3</sub>)<sub>2</sub>SO, δ 2.49), solvent <sup>13</sup>C signals (CDCl<sub>3</sub>, δ 77.16; (CD<sub>3</sub>)<sub>2</sub>SO, δ 39.52). Signals are listed in ppm, and multiplicity identified as s=singlet, br=broad, d=doublet, t=triplet, q=quartet, m=multiplet; coupling constant in Hz. High resolution mass spectra were obtained using Bruker MALDI-TOF-MS.

## 2. General procedure for the Synthesis of Ynones (3aa-3f'a)

A mixture of carboxylic acids (0.40 mmol), phenylacetylene (0.20 mmol), IPrCl-Cl (0.44 mmol), CuI (5 mol%) and Pd(PPh<sub>3</sub>)<sub>2</sub>Cl<sub>2</sub> (2 mol%) in Et<sub>3</sub>N (3 mL) was stirred at 90 °C under argon atmosphere for 3 h. The reaction was quenched by water and extracted with dichloromethane. The combined organic extracts were dried over Na<sub>2</sub>SO<sub>4</sub>, concentrated in vacuum. The resulting residue was purified by silica gel column chromatography to afford the desired products.

## 3. General procedure for the Synthesis of Ynones (3ab-3ao)

A mixture of benzoic acid (0.40 mmol), alkynes (0.20 mmol), IPrCl-Cl (0.44 mmol), CuI (5 mol%) and Pd(PPh<sub>3</sub>)<sub>2</sub>Cl<sub>2</sub> (2 mol%) in Et<sub>3</sub>N (3 mL) was stirred at 90 °C under argon atmosphere for 3 h. The reaction was quenched by water and extracted with dichloromethane. The combined organic extracts were dried over Na<sub>2</sub>SO<sub>4</sub>,

concentrated in vacuum. The resulting residue was purified by silica gel column chromatography to afford the desired products.

#### 4. Table S1, S2, S3 and S4

**Table S1.** Effects of the quantity of 2-chloroimidazolium salts

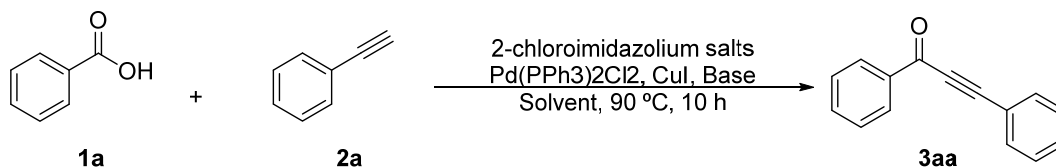

| Entry          | 2-Chloroimidazolium salt (equiv) | Base              | Solvent | Yield (%) <sup>b</sup> |
|----------------|----------------------------------|-------------------|---------|------------------------|
| 1 <sup>a</sup> | IPrCl-Cl (2.0)                   | Et <sub>3</sub> N | toluene | 60                     |
| 2              | IPrCl-Cl (2.2)                   | Et <sub>3</sub> N | toluene | 67                     |
| 3              | IPrCl-Cl (2.5)                   | Et <sub>3</sub> N | toluene | 65                     |
| 4              | IPrCl-Cl (3.0)                   | Et <sub>3</sub> N | toluene | 59                     |

<sup>a</sup>General reaction conditions: benzoic acid (0.40 mmol), phenylacetylene (0.20 mmol), Pd(PPh<sub>3</sub>)<sub>2</sub>Cl<sub>2</sub> (5 mol%),

CuI (5 mol%), base (0.80 mmol), solvent (3 mL) were stirred and heated at 90 °C under argon atmosphere for 10 h.

<sup>b</sup>Determined by <sup>1</sup>H NMR and diethyl D-tartrate was used as internal standard.

**Table S2.** Effects of catalyst

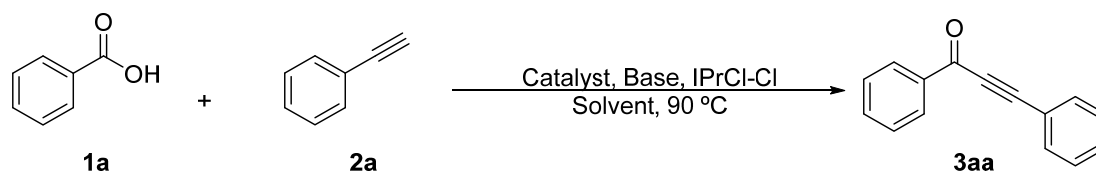

| Entry          | Catalyst                                                             | Base              | Solvent | Yield (%) <sup>b</sup> |
|----------------|----------------------------------------------------------------------|-------------------|---------|------------------------|
| 1 <sup>a</sup> | 5 mol% CuI                                                           | Et <sub>3</sub> N | toluene | n. d.                  |
| 2              | 5 mol% Pd(PPh <sub>3</sub> ) <sub>2</sub> Cl <sub>2</sub>            | Et <sub>3</sub> N | toluene | 31                     |
| 3              | 5 mol% CuI/5 mol% Pd(PPh <sub>3</sub> ) <sub>2</sub> Cl <sub>2</sub> | Et <sub>3</sub> N | toluene | 67                     |
| 4              | 5 mol% CuI/5 mol% Pd(PPh <sub>3</sub> ) <sub>4</sub>                 | Et <sub>3</sub> N | toluene | 55                     |
| 5              | 5 mol% CuI/5 mol% Pd(OAc) <sub>2</sub>                               | Et <sub>3</sub> N | toluene | 17                     |

|   |                                                                       |                   |         |    |
|---|-----------------------------------------------------------------------|-------------------|---------|----|
| 6 | 5 mol% CuI/5 mol% Pd(OAc) <sub>2</sub> /12 mol% PPh <sub>3</sub>      | Et <sub>3</sub> N | toluene | 31 |
| 7 | 5 mol% CuBr/5 mol% Pd(PPh <sub>3</sub> ) <sub>2</sub> Cl <sub>2</sub> | Et <sub>3</sub> N | toluene | 61 |
| 8 | 5 mol% CuCl/5 mol% Pd(PPh <sub>3</sub> ) <sub>2</sub> Cl <sub>2</sub> | Et <sub>3</sub> N | toluene | 50 |

<sup>a</sup> General reaction conditions: benzoic acid (0.40 mmol), phenylacetylene (0.20 mmol), IPrCl-Cl (0.44 mmol), base (0.80 mmol), solvent (3 mL) were stirred and heated at 90 °C under argon atmosphere for 10 h. <sup>b</sup> Determined by <sup>1</sup>H NMR and diethyl D-tartrate was used as internal standard.

**Table S3.** Effects of the toluene/Et<sub>3</sub>N mixed solvent ratio

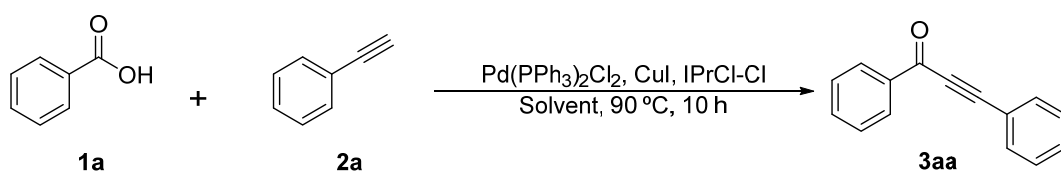

| Entry          | Solvent                        | Yield (%) <sup>b</sup> |
|----------------|--------------------------------|------------------------|
| 1 <sup>a</sup> | toluene/ Et <sub>3</sub> N=1/2 | 75                     |
| 2              | toluene/ Et <sub>3</sub> N=2/1 | 69                     |
| 3              | Et <sub>3</sub> N              | 84                     |

<sup>a</sup> General reaction conditions: benzoic acid (0.40 mmol), phenylacetylene (0.20 mmol), Pd(PPh<sub>3</sub>)<sub>2</sub>Cl<sub>2</sub> (5 mol%), CuI (5 mol%), IPrCl-Cl (0.44 mmol), solvent (3 mL) were stirred and heated at 90 °C under argon atmosphere for 10 h. <sup>b</sup> Determined by <sup>1</sup>H NMR and (d)-diethyltartrate was used as internal standard

**Table S4.** Effects of the quantity of phenylacetylene

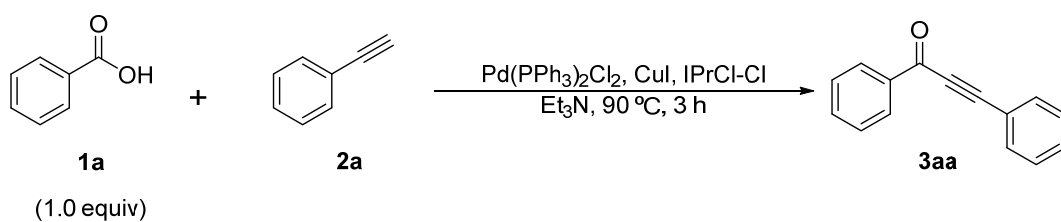

| Entry          | Equiv of Phenylacetylene | Yield (%) <sup>b</sup> |
|----------------|--------------------------|------------------------|
| 1 <sup>a</sup> | 0.5                      | 83                     |
| 2              | 0.8                      | 76                     |
| 3              | 1.0                      | 73                     |
| 4              | 1.5                      | 66                     |

<sup>a</sup>General reaction conditions: benzoic acid (0.40 mmol), Pd(PPh<sub>3</sub>)<sub>2</sub>Cl<sub>2</sub> (2 mol%), CuI (5 mol%), IPrCl-Cl (0.44 mmol), solvent (3 mL) were stirred and heated at 90 °C under argon atmosphere for 3 h. <sup>b</sup>Determined by <sup>1</sup>H NMR and diethyl D-tartrate was used as internal standard.

## 5. Characterization Data of Isolated Products

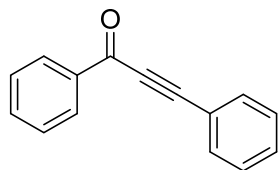

**1,3-Diphenylprop-2-yn-1-one (3aa)<sup>2</sup>:** The general procedure was followed, and flash chromatography (petroleum ether/ethyl acetate = 40/1) afforded 0.168 mmol (84%). Light yellow solid. mp: 48-50 °C. TLC: R<sub>f</sub> = 0.60 (petroleum ether/ethyl acetate = 20/1). <sup>1</sup>H NMR (300 MHz, Chloroform-*d*) δ 8.36-8.10 (m, 2H), 7.78-7.66 (m, 2H), 7.62 (d, *J* = 7.1 Hz, 1H), 7.56 -7.45 (m, 3H), 7.45-7.36 (m, 2H). <sup>13</sup>C NMR (75 MHz, Chloroform-*d*) δ 178.10, 136.91, 134.23, 133.15, 130.91, 129.64, 128.77, 128.71, 120.15, 93.22, 86.96.

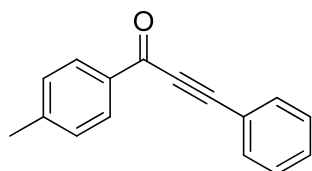

**3-Phenyl-1-(p-tolyl)prop-2-yn-1-one (3ba)<sup>3</sup>:** The general procedure was followed, and flash chromatography (petroleum ether/ethyl acetate = 40/1) afforded 0.176 mmol (88%). Light yellow solid. mp: 70-72 °C. TLC: R<sub>f</sub> = 0.60 (petroleum ether/ethyl acetate = 20/1). <sup>1</sup>H NMR (300 MHz, Chloroform-*d*) δ 8.10 (d, *J* = 8.2 Hz, 2H), 7.72-7.60 (m, 2H), 7.47-7.42 (m, 1H), 7.41-7.33 (m, 2H), 7.27 (d, *J* = 8.2 Hz, 2H), 2.40 (s, 3H). <sup>13</sup>C NMR (75 MHz, Chloroform-*d*) δ 177.57, 145.19, 134.58, 132.95, 130.66, 129.63, 129.32, 128.63, 120.17, 92.55, 86.98, 21.75.

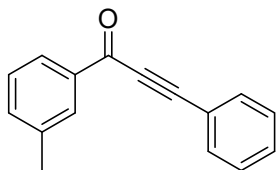

**3-Phenyl-1-(m-tolyl)prop-2-yn-1-one (3ca)**<sup>4</sup>: The general procedure was followed, and flash chromatography (petroleum ether/ethyl acetate = 40/1) afforded 0.154 mmol (77%). Light yellow oil. TLC:  $R_f$  = 0.60 (petroleum ether/ethyl acetate = 20/1). <sup>1</sup>H NMR (300 MHz, Chloroform-*d*)  $\delta$  8.10-7.96 (m, 2H), 7.72-7.64 (m, 2H), 7.51-7.35 (m, 5H), 2.44 (s, 3H). <sup>13</sup>C NMR (75 MHz, Chloroform-*d*)  $\delta$  178.23, 138.54, 136.98, 135.04, 133.09, 130.81, 129.82, 128.74, 128.58, 127.16, 120.25, 92.93, 87.09, 21.38.

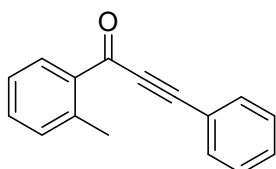

**3-Phenyl-1-(o-tolyl)prop-2-yn-1-one (3da)**<sup>5</sup>: The general procedure was followed, and flash chromatography (petroleum ether/ethyl acetate = 40/1) afforded 0.164 mmol (82%). Light yellow oil. TLC:  $R_f$  = 0.60 (petroleum ether/ethyl acetate = 20/1). <sup>1</sup>H NMR (300 MHz, Chloroform-*d*)  $\delta$  8.31 (dd,  $J$  = 7.7, 1.4 Hz, 1H), 7.70-7.62 (m, 2H), 7.50-7.34 (m, 5H), 7.28 (d,  $J$  = 7.5 Hz, 1H), 2.69 (s, 3H). <sup>13</sup>C NMR (75 MHz, Chloroform-*d*)  $\delta$  179.83, 140.54, 135.81, 133.25, 132.99, 132.26, 130.67, 128.72, 125.98, 120.43, 91.90, 88.49, 22.02.

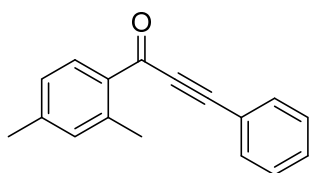

**1-(2,4-Dimethylphenyl)-3-phenylprop-2-yn-1-one (3ea)**<sup>6</sup>: The general procedure was followed, and flash chromatography (petroleum ether/ethyl acetate = 40/1) afforded 0.122 mmol (61%). Light yellow oil. TLC:  $R_f$  = 0.65 (petroleum ether/ethyl acetate = 20/1). <sup>1</sup>H NMR (300 MHz, Chloroform-*d*)  $\delta$  8.22 (d,  $J$  = 7.9 Hz, 1H), 7.71-7.59 (m, 2H), 7.49-7.35 (m, 3H), 7.15 (d,  $J$  = 8.0 Hz, 1H), 7.07 (s, 1H), 2.66 (s,

3H), 2.38 (s, 3H).  $^{13}\text{C}$  NMR (75 MHz, Chloroform-*d*)  $\delta$  179.27, 143.89, 140.65, 133.70, 133.24, 133.06, 132.86, 130.48, 128.64, 126.63, 120.52, 91.27, 88.49, 22.01, 21.56.

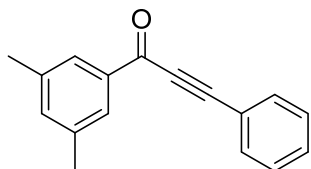

**1-(3,5-Dimethylphenyl)-3-phenylprop-2-yn-1-one (3fa)**<sup>5</sup>: The general procedure was followed, and flash chromatography (petroleum ether/ethyl acetate = 40/1) afforded 0.154 mmol (77%). Light yellow oil. TLC:  $R_f$  = 0.65 (petroleum ether/ethyl acetate = 20/1).  $^1\text{H}$  NMR (300 MHz, Chloroform-*d*)  $\delta$  7.82 (s, 2H), 7.67 (dd,  $J$  = 7.9, 1.3 Hz, 2H), 7.49-7.36 (m, 3H), 7.23 (s, 1H), 2.39 (s, 6H).  $^{13}\text{C}$  NMR (75 MHz, Chloroform-*d*)  $\delta$  178.27, 138.31, 136.98, 135.91, 132.97, 130.68, 128.66, 127.34, 120.26, 92.60, 87.16, 21.18.

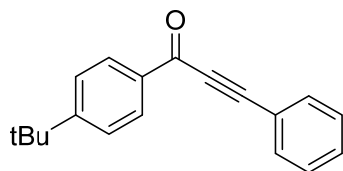

**1-(4-(Tert-butyl)phenyl)-3-phenylprop-2-yn-1-one (3ga)**<sup>7</sup>: The general procedure was followed, and flash chromatography (petroleum ether/ethyl acetate = 40/1) afforded 0.152 mmol (76%). Light yellow oil. TLC:  $R_f$  = 0.60 (petroleum ether/ethyl acetate = 20/1).  $^1\text{H}$  NMR (300 MHz, Chloroform-*d*)  $\delta$  8.21-8.12 (m, 2H), 7.71-7.62 (m, 2H), 7.57-7.49 (m, 2H), 7.49-7.42 (m, 1H), 7.42-7.34 (m, 2H), 1.35 (s, 9H).  $^{13}\text{C}$  NMR (75 MHz, Chloroform-*d*)  $\delta$  177.59, 158.06, 134.54, 132.99, 130.68, 129.54, 128.66, 125.60, 120.24, 92.60, 87.07, 35.23, 31.03.

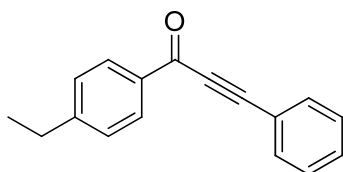

**1-(4-Ethylphenyl)-3-phenylprop-2-yn-1-one (3ha)**<sup>6</sup>: The general procedure was followed, and flash chromatography (petroleum ether/ethyl acetate = 40/1) afforded 0.162 mmol (81%). Light yellow oil. TLC:  $R_f$  = 0.60 (petroleum ether/ethyl acetate = 20/1). <sup>1</sup>H NMR (300 MHz, Chloroform-*d*)  $\delta$  8.15 (d,  $J$  = 8.3 Hz, 2H), 7.71-7.62 (m, 2H), 7.51-7.43 (m, 1H), 7.43-7.36 (m, 2H), 7.33 (d,  $J$  = 8.5 Hz, 2H), 2.72 (q,  $J$  = 7.6 Hz, 1H), 1.27 (t,  $J$  = 7.6 Hz, 2H). <sup>13</sup>C NMR (75 MHz, Chloroform-*d*)  $\delta$  177.71, 151.40, 134.88, 133.03, 130.72, 129.84, 128.70, 128.21, 120.29, 92.64, 87.07, 29.12, 15.16.

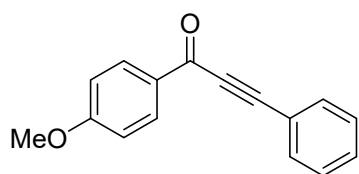

**1-(4-Methoxyphenyl)-3-phenylprop-2-yn-1-one (3ia)**<sup>3</sup>: The general procedure was followed, and flash chromatography (petroleum ether/ethyl acetate = 35/1) afforded 0.144 mmol (72%). Light yellow solid. mp: 95-97 °C. TLC:  $R_f$  = 0.45 (petroleum ether/ethyl acetate = 20/1). <sup>1</sup>H NMR (300 MHz, Chloroform-*d*)  $\delta$  8.19 (d,  $J$  = 9.0 Hz, 2H), 7.67 (dd,  $J$  = 8.1, 1.5 Hz, 2H), 7.51-7.44 (m, 1H), 7.44-7.36 (m, 2H), 6.98 (d,  $J$  = 9.0 Hz, 2H), 3.89 (s, 3H). <sup>13</sup>C NMR (75 MHz, Chloroform-*d*)  $\delta$  176.76, 164.61, 133.05, 132.08, 130.69, 130.43, 128.76, 120.47, 114.00, 92.41, 87.05, 55.70.

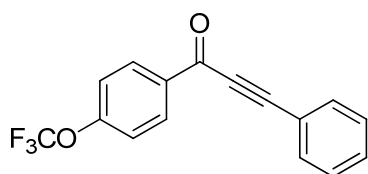

**3-Phenyl-1-[4-(trifluoromethoxy)phenyl]-2-propyn-1-one (3ja)**: The general procedure was followed, and flash chromatography (petroleum ether/ethyl acetate = 35/1) afforded 0.106 mmol (53%). Light yellow oil. TLC:  $R_f$  = 0.45 (petroleum ether/ethyl acetate = 20/1). <sup>1</sup>H NMR (300 MHz, Chloroform-*d*)  $\delta$  8.26 (d,  $J$  = 8.7 Hz, 2H), 7.67 (dd,  $J$  = 8.2, 1.3 Hz, 2H), 7.51-7.38 (m, 3H), 7.33 (d,  $J$  = 8.7 Hz, 2H). <sup>13</sup>C NMR (75 MHz, Chloroform-*d*)  $\delta$  176.33, 153.50, 135.26, 133.20, 131.63, 131.11, 128.85, 122.15, 120.44, 119.98, 118.71, 93.91, 86.67. <sup>19</sup>F NMR (376 MHz,



Chloroform-*d*)  $\delta$  -57.57. IR ( $\text{cm}^{-1}$ ) 2199, 1644. HRMS (MALDI)  $m/z$   $[\text{M}+\text{H}]^+$  calcd for  $\text{C}_{16}\text{H}_9\text{F}_3\text{O}_2$ : 291.0633, found: 291.0638.

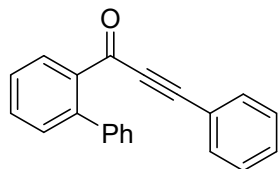

**1-([1,1'-Biphenyl]-2-yl)-3-phenylprop-2-yn-1-one (3ka)**<sup>8</sup>: The general procedure was followed, and flash chromatography (petroleum ether/ethyl acetate = 40/1) afforded 0.094 mmol (47%). Light yellow oil. TLC:  $R_f$  = 0.50 (petroleum ether/ethyl acetate = 20/1).  $^1\text{H}$  NMR (300 MHz, Chloroform-*d*)  $\delta$  7.94 (dd,  $J$  = 7.8, 1.2 Hz, 1H), 7.57 (td,  $J$  = 7.5, 1.3 Hz, 1H), 7.45 (td,  $J$  = 7.6, 1.3 Hz, 1H), 7.42-7.38 (m, 5H), 7.35-7.31 (m, 2H), 7.26-7.20 (m, 4H).;  $^{13}\text{C}$  NMR (75 MHz, Chloroform-*d*)  $\delta$  180.77, 142.81, 140.50, 138.09, 133.05, 132.25, 131.14, 130.52, 130.14, 129.63, 128.47, 128.38, 127.92, 127.51, 120.15, 93.93, 88.90.

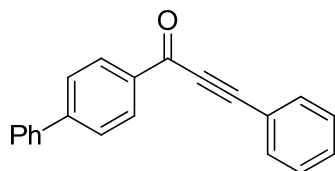

**1-([1,1'-Biphenyl]-4-yl)-3-phenylprop-2-yn-1-one (3la)**<sup>5</sup>: The general procedure was followed, and flash chromatography (petroleum ether/ethyl acetate = 40/1) afforded 0.158 mmol (79%). Light yellow solid. mp: 107-109 °C. TLC:  $R_f$  = 0.50 (petroleum ether/ethyl acetate = 20/1).  $^1\text{H}$  NMR (300 MHz, Chloroform-*d*)  $\delta$  8.30 (d,  $J$  = 8.6 Hz, 2H), 7.78-7.69 (m, 4H), 7.69-7.62 (m, 2H), 7.53-7.40 (m, 6H).  $^{13}\text{C}$  NMR (75 MHz, Chloroform-*d*)  $\delta$  177.67, 146.94, 139.87, 135.91, 133.20, 130.90, 130.29, 129.13, 128.82, 128.56, 127.46, 127.40, 120.32, 93.22, 87.16.

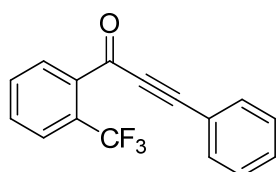

**3-Phenyl-1-[2-(trifluoromethyl)phenyl]-2-propyn-1-one (3ma):** The general procedure was followed, and flash chromatography (petroleum ether/ethyl acetate = 40/1) afforded 0.070 mmol (35%). Light yellow oil. TLC:  $R_f$  = 0.60 (petroleum ether/ethyl acetate = 20/1).  $^1\text{H}$  NMR (300 MHz, Chloroform-*d*)  $\delta$  8.11 (d,  $J$  = 7.0 Hz, 1H), 7.80 (d,  $J$  = 8.1 Hz, 1H), 7.74-7.64 (m, 2H), 7.64-7.60 (m, 2H), 7.52-7.45 (m, 1H), 7.44-7.35 (m, 2H).  $^{13}\text{C}$  NMR (75 MHz, Chloroform-*d*)  $\delta$  177.86, 137.65, 133.23, 132.02 (d,  $J$  = 9.7 Hz), 131.24, 128.82, 127.36 (q,  $J$  = 5.6 Hz), 125.28, 121.65, 119.82, 94.45, 88.17.  $^{19}\text{F}$  NMR (376 MHz, Chloroform-*d*)  $\delta$  -58.27. IR ( $\text{cm}^{-1}$ ) 2196, 1656. HRMS (MALDI)  $m/z$   $[\text{M}+\text{H}]^+$  calcd for  $\text{C}_{16}\text{H}_9\text{F}_3\text{O}$ : 275.0684, found: 275.0678.

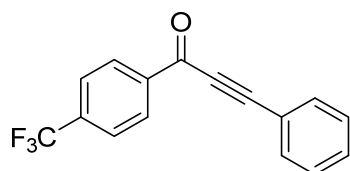

**3-Phenyl-1-(4-(trifluoromethyl)phenyl)prop-2-yn-1-one (3na)<sup>5</sup>:** The general procedure was followed, and flash chromatography (petroleum ether/ethyl acetate = 40/1) afforded 0.100 mmol (50%). Light yellow oil. TLC:  $R_f$  = 0.60 (petroleum ether/ethyl acetate = 20/1).  $^1\text{H}$  NMR (300 MHz, Chloroform-*d*)  $\delta$  8.32 (d,  $J$  = 8.1 Hz, 2H), 7.77 (d,  $J$  = 8.6 Hz, 2H), 7.72-7.63 (m, 2H), 7.55-7.47 (m, 1H), 7.47-7.37 (m, 2H).  $^{13}\text{C}$  NMR (75 MHz, Chloroform-*d*)  $\delta$  176.75, 139.57, 135.29 (q,  $J$  = 32.7 Hz), 133.30, 131.29, 129.90, 128.91, 125.81 (q,  $J$  = 3.7 Hz), 121.88, 119.83, 94.56, 86.72.

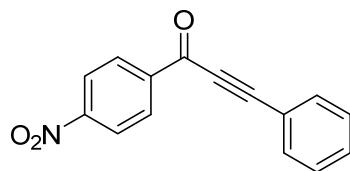

**1-(4-Nitrophenyl)-3-phenylprop-2-yn-1-one (3oa)<sup>7</sup>:** The general procedure was followed, and flash chromatography (petroleum ether/ethyl acetate = 35/1) afforded 0.074 mmol (37%). Light yellow solid. mp: 154-156 °C. TLC:  $R_f$  = 0.50 (petroleum ether/ethyl acetate = 20/1).  $^1\text{H}$  NMR (300 MHz, Chloroform-*d*)  $\delta$  8.37 (s, 4H), 7.71 (dd,  $J$  = 8.2, 1.4 Hz, 2H), 7.57-7.51 (m, 1H), 7.50-7.41 (m, 2H).  $^{13}\text{C}$  NMR (75 MHz,

Chloroform-*d*)  $\delta$  176.01, 151.03, 141.18, 133.42, 131.59, 130.57, 129.01, 124.00, 119.55, 95.55, 86.68.

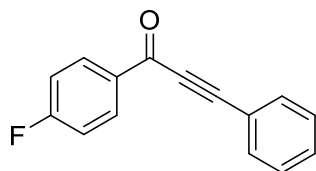

**1-(4-Fluorophenyl)-3-phenylprop-2-yn-1-one (3pa)<sup>5</sup>:** The general procedure was followed, and flash chromatography (petroleum ether/ethyl acetate = 40/1) afforded 0.142 mmol (71%). Light yellow solid. mp: 60-62 °C. TLC:  $R_f$  = 0.60 (petroleum ether/ethyl acetate = 20/1). <sup>1</sup>H NMR (300 MHz, Chloroform-*d*)  $\delta$  8.29-8.16 (m, 2H), 7.72-7.60 (m, 2H), 7.49-7.43 (m, 1H), 7.43-7.34 (m, 2H), 7.20-7.10 (m, 2H). <sup>13</sup>C NMR (75 MHz, Chloroform-*d*)  $\delta$  176.30, 168.16, 164.76, 133.45 (d,  $J$  = 2.8 Hz), 133.07, 132.23 (d,  $J$  = 9.7 Hz), 130.93, 128.74, 119.97, 115.86 (d,  $J$  = 22.2 Hz), 93.37, 86.65.

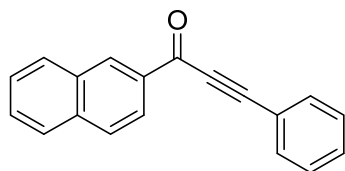

**1-(Naphthalen-2-yl)-3-phenylprop-2-yn-1-one (3qa)<sup>5</sup>:** The general procedure was followed, and flash chromatography (petroleum ether/ethyl acetate = 40/1) afforded 0.150 mmol (75%). Light yellow solid. mp: 93-95 °C. TLC:  $R_f$  = 0.55 (petroleum ether/ethyl acetate = 20/1). <sup>1</sup>H NMR (300 MHz, Chloroform-*d*)  $\delta$  8.75 (s, 1H), 8.20 (dd,  $J$  = 8.6, 1.7 Hz, 1H), 7.99 (d,  $J$  = 7.6 Hz, 1H), 7.93-7.81 (m, 2H), 7.72 (dd,  $J$  = 7.8, 1.4 Hz, 2H), 7.64-7.52 (m, 2H), 7.51-7.39 (m, 3H). <sup>13</sup>C NMR (75 MHz, Chloroform-*d*)  $\delta$  177.83, 136.11, 134.38, 133.05, 132.60, 132.37, 130.79, 129.86, 129.01, 128.70, 128.52, 127.90, 126.94, 123.90, 120.18, 93.06, 87.12.

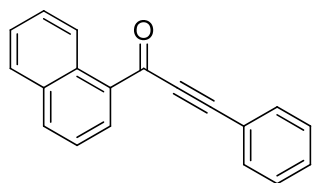

**1-(Naphthalen-1-yl)-3-phenylprop-2-yn-1-one (3ra)**<sup>9</sup>: The general procedure was followed, and flash chromatography (petroleum ether/ethyl acetate = 40/1) afforded 0.134 mmol (67%). Light yellow solid. mp: 92-94 °C. TLC:  $R_f$  = 0.55 (petroleum ether/ethyl acetate = 20/1). <sup>1</sup>H NMR (300 MHz, Chloroform-*d*)  $\delta$  9.30 (d,  $J$  = 8.6 Hz, 1H), 8.65 (dd,  $J$  = 7.3, 1.3 Hz, 1H), 8.06 (d,  $J$  = 8.2 Hz, 1H), 7.89 (d,  $J$  = 8.1 Hz, 1H), 7.74-7.64 (m, 3H), 7.63-7.52 (m, 2H), 7.51-7.35 (m, 3H). <sup>13</sup>C NMR (75 MHz, Chloroform-*d*)  $\delta$  179.67, 135.13, 134.56, 133.86, 132.92, 130.72, 130.62, 128.94, 128.66, 128.61, 126.75, 125.97, 124.48, 120.31, 91.73, 88.55.

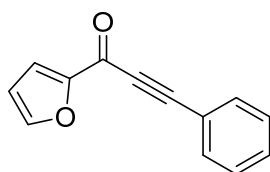

**1-(Furan-2-yl)-3-phenylprop-2-yn-1-one (3sa)**<sup>10</sup>: The general procedure was followed, and flash chromatography (petroleum ether/ethyl acetate = 30/1) afforded 0.154 mmol (77%). Light yellow solid. mp: 53-55 °C. TLC:  $R_f$  = 0.40 (petroleum ether/ethyl acetate = 20/1). <sup>1</sup>H NMR (300 MHz, Chloroform-*d*)  $\delta$  7.71-7.56 (m, 3H), 7.49-7.32 (m, 4H), 6.62-6.54 (m, 1H). <sup>13</sup>C NMR (75 MHz, Chloroform-*d*)  $\delta$  164.73, 153.21, 148.10, 133.04, 130.91, 128.71, 121.02, 119.85, 112.73, 91.91, 86.26.

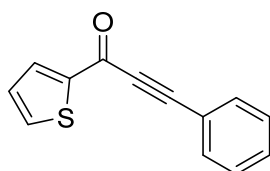

**3-Phenyl-1-(thiophen-2-yl)prop-2-yn-1-one (3ta)**<sup>11</sup>: The general procedure was followed, and flash chromatography (petroleum ether/ethyl acetate = 30/1) afforded 0.162 mmol (81%). Light yellow solid. mp: 55-57 °C. TLC:  $R_f$  = 0.40 (petroleum ether/ethyl acetate = 20/1). <sup>1</sup>H NMR (300 MHz, Chloroform-*d*)  $\delta$  8.01 (dd,  $J$  = 3.8, 1.2

Hz, 1H), 7.73 (dd,  $J = 4.9, 1.2$  Hz, 1H), 7.66 (dt,  $J = 6.7, 1.5$  Hz, 2H), 7.52-7.46 (m, 1H), 7.45-7.37 (m, 2H), 7.19 (dd,  $J = 4.9, 3.8$  Hz, 1H).  $^{13}\text{C}$  NMR (75 MHz, Chloroform-*d*)  $\delta$  169.90, 145.11, 135.33, 135.16, 133.17, 130.97, 128.83, 128.46, 120.11, 91.86, 86.64.

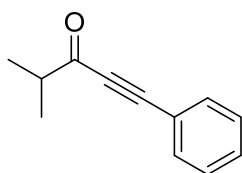

**4-Methyl-1-phenylpent-1-yn-3-one (3ua)**<sup>12</sup>: The general procedure was followed, and flash chromatography (petroleum ether/ethyl acetate = 40/1) afforded 0.034 mmol (17%). Light yellow oil. TLC:  $R_f = 0.65$  (petroleum ether/ethyl acetate = 20/1).  $^1\text{H}$  NMR (300 MHz, Chloroform-*d*)  $\delta$  7.63-7.53 (m, 2H), 7.50-7.42 (m, 1H), 7.42-7.33 (m, 2H), 2.76 (p,  $J = 7.0$  Hz, 1H), 1.28 (s, 3H), 1.26 (s, 3H).  $^{13}\text{C}$  NMR (75 MHz, Chloroform-*d*)  $\delta$  192.26, 133.16, 130.73, 128.76, 120.38, 91.72, 87.04, 43.26, 18.19.

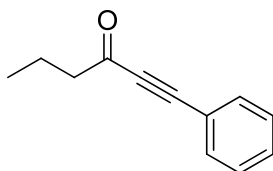

**1-Phenylhex-1-yn-3-one (3va)**<sup>13</sup>: The general procedure was followed, and flash chromatography (petroleum ether/ethyl acetate = 40/1) afforded 0.124 mmol (62%). Light yellow oil. TLC:  $R_f = 0.65$  (petroleum ether/ethyl acetate = 20/1).  $^1\text{H}$  NMR (300 MHz, Chloroform-*d*)  $\delta$  7.61-7.53 (m, 2H), 7.50-7.42 (m, 1H), 7.42-7.33 (m, 2H), 2.65 (t,  $J = 7.3$  Hz, 2H), 1.78 (h,  $J = 7.4$  Hz, 2H), 1.00 (t,  $J = 7.4$  Hz, 3H).  $^{13}\text{C}$  NMR (75 MHz, Chloroform-*d*)  $\delta$  188.31, 133.17, 130.77, 128.75, 120.23, 90.68, 87.99, 47.55, 17.85, 13.71.

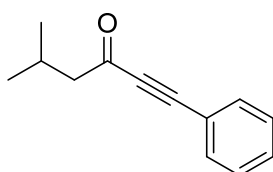

**5-Methyl-1-phenylhex-1-yn-3-one (3wa)**<sup>14</sup>: The general procedure was followed, and flash chromatography (petroleum ether/ethyl acetate = 40/1) afforded 0.068 mmol (34%). Light yellow oil. TLC:  $R_f = 0.65$  (petroleum ether/ethyl acetate = 20/1). <sup>1</sup>H NMR (300 MHz, Chloroform-*d*)  $\delta$  7.62-7.51 (m, 2H), 7.47-7.41 (m, 1H), 7.41-7.32 (m, 2H), 2.54 (d,  $J = 7.0$  Hz, 2H), 2.40-2.26 (m, 1H), 1.01 (d,  $J = 6.6$  Hz, 6H). <sup>13</sup>C NMR (75 MHz, Chloroform-*d*)  $\delta$  187.92, 133.12, 130.73, 128.72, 120.23, 90.52, 88.26, 54.59, 25.39, 22.56.

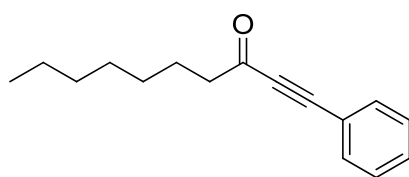

**1-Phenyldec-1-yn-3-one (3xa)**<sup>15</sup>: The general procedure was followed, and flash chromatography (petroleum ether/ethyl acetate = 40/1) afforded 0.100 mmol (50%). Light yellow oil. TLC:  $R_f = 0.65$  (petroleum ether/ethyl acetate = 20/1). <sup>1</sup>H NMR (300 MHz, Chloroform-*d*)  $\delta$  7.60-7.54 (m, 2H), 7.48-7.42 (m, 1H), 7.42-7.35 (m, 2H), 2.66 (t,  $J = 7.0$  Hz, 2H), 1.80-1.69 (m, 2H), 1.40-1.24 (m, 8H), 0.88 (t,  $J = 6.9$  Hz, 3H). <sup>13</sup>C NMR (75 MHz, Chloroform-*d*)  $\delta$  188.47, 133.13, 130.75, 128.72, 120.16, 90.66, 87.96, 45.66, 31.76, 29.13, 29.08, 24.29, 22.71, 14.18.

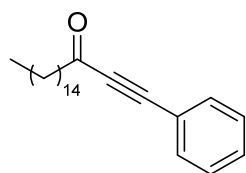

**1-Phenyloctadec-1-yn-3-one (3ya)**<sup>16</sup>: The general procedure was followed, and flash chromatography (petroleum ether/ethyl acetate = 40/1) afforded 0.102 mmol (51%). Light yellow solid. mp: 50-52 °C. TLC:  $R_f = 0.65$  (petroleum ether/ethyl acetate = 20/1). <sup>1</sup>H NMR (300 MHz, Chloroform-*d*)  $\delta$  7.62-7.53 (m, 2H), 7.51-7.39 (m, 2H), 7.42-7.34 (m, 2H), 2.66 (t,  $J = 7.3$  Hz, 2H), 1.74 (p,  $J = 7.2$  Hz, 2H), 1.26 (s, 24H), 0.88 (t,  $J = 6.5$  Hz, 3H). <sup>13</sup>C NMR (75 MHz, Chloroform-*d*)  $\delta$  188.38, 133.16, 130.74, 128.75, 120.31, 90.66, 88.05, 45.71, 32.07, 29.83, 29.80, 29.74, 29.59, 29.50, 29.18,

24.37, 22.83, 14.23.

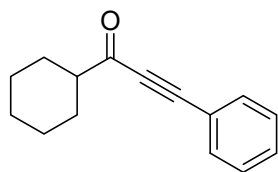

**1-Cyclohexyl-3-phenylprop-2-yn-1-one (3za)<sup>11</sup>:** The general procedure was followed, and flash chromatography (petroleum ether/ethyl acetate = 40/1) afforded 0.094 mmol (47%). Light yellow oil. TLC:  $R_f$  = 0.65 (petroleum ether/ethyl acetate = 20/1). <sup>1</sup>H NMR (300 MHz, Chloroform-*d*)  $\delta$  7.65-7.52 (m, 2H), 7.49-7.41 (m, 1H), 7.41-7.31 (m, 2H), 2.49 (tt,  $J$  = 11.0, 3.6 Hz, 1H), 2.12-1.98 (m, 2H), 1.89-1.76 (m, 2H), 1.72-1.63 (m, 1H), 1.60-1.44 (m, 2H), 1.40-1.20 (m, 3H). <sup>13</sup>C NMR (75 MHz, Chloroform-*d*)  $\delta$  191.47, 133.06, 130.63, 128.66, 120.28, 91.40, 87.31, 52.38, 28.40, 25.89, 25.49.

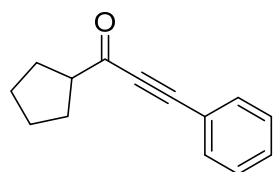

**1-Cyclopentyl-3-phenylprop-2-yn-1-one (3a'a)<sup>14</sup>:** The general procedure was followed, and flash chromatography (petroleum ether/ethyl acetate = 40/1) afforded 0.046 mmol (23%). Light yellow oil. TLC:  $R_f$  = 0.65 (petroleum ether/ethyl acetate = 20/1). <sup>1</sup>H NMR (300 MHz, Chloroform-*d*)  $\delta$  7.56 (dd,  $J$  = 8.1, 1.5 Hz, 2H), 7.48-7.41 (m, 1H), 7.41-7.32 (m, 2H), 3.03 (tt,  $J$  = 8.6, 7.2 Hz, 1H), 2.11-1.85 (m, 4H), 1.77-1.59 (m, 4H). <sup>13</sup>C NMR (75 MHz, Chloroform-*d*)  $\delta$  191.18, 133.10, 130.67, 128.72, 120.34, 91.26, 87.43, 53.91, 29.27, 26.13.

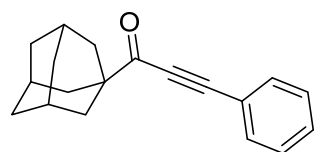

**1-((3r,5r,7r)-Adamantan-1-yl)-3-phenylprop-2-yn-1-one (3b'a)<sup>11</sup>:** The general

procedure was followed, and flash chromatography (petroleum ether/ethyl acetate = 40/1) afforded 0.074 mmol (37%). Light yellow oil. TLC:  $R_f$  = 0.65 (petroleum ether/ethyl acetate = 20/1).  $^1\text{H}$  NMR (300 MHz, Chloroform-*d*)  $\delta$  7.63-7.54 (m, 2H), 7.47-7.40 (m, 1H), 7.40-7.32 (m, 2H), 2.09 (s, 3H), 1.98-1.90 (m, 6H), 1.80-1.68 (m, 6H).  $^{13}\text{C}$  NMR (75 MHz, Chloroform-*d*)  $\delta$  193.99, 133.04, 130.56, 128.65, 120.42, 92.28, 86.12, 47.01, 38.20, 36.59, 27.98.

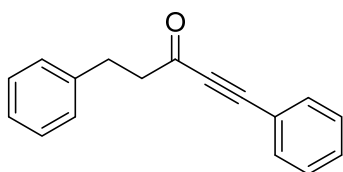

**1,5-Diphenylpent-1-yn-3-one (3c'a)<sup>11</sup>**: The general procedure was followed, and flash chromatography (petroleum ether/ethyl acetate = 40/1) afforded 0.060 mmol (30%). Light yellow oil. TLC:  $R_f$  = 0.60 (petroleum ether/ethyl acetate = 20/1).  $^1\text{H}$  NMR (300 MHz, Chloroform-*d*)  $\delta$  7.58-7.52 (m, 2H), 7.46-7.42 (m, 1H), 7.37 (t,  $J$  = 7.5 Hz, 2H), 7.29 (t,  $J$  = 7.5 Hz, 2H), 7.23-7.18 (m, 3H), 3.07-3.03 (m, 2H), 3.01-2.98 (m, 2H).  $^{13}\text{C}$  NMR (75 MHz, Chloroform-*d*)  $\delta$  186.99, 140.37, 133.18, 130.88, 128.76, 128.69, 128.48, 126.43, 120.02, 91.29, 87.88, 47.10, 30.10.

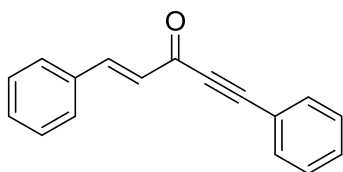

**(E)-1,5-diphenylpent-1-en-4-yn-3-one (3d'a)<sup>17</sup>**: The general procedure was followed, and flash chromatography (petroleum ether/ethyl acetate = 40/1) afforded 0.140 mmol (70%). Light yellow solid. mp: 69-71 °C. TLC:  $R_f$  = 0.60 (petroleum ether/ethyl acetate = 20/1).  $^1\text{H}$  NMR (300 MHz, Chloroform-*d*)  $\delta$  7.92 (d,  $J$  = 16.1 Hz, 1H), 7.71-7.64 (m, 2H), 7.64-7.55 (m, 2H), 7.50-7.37 (m, 6H), 6.88 (d,  $J$  = 16.1 Hz, 1H).  $^{13}\text{C}$  NMR (75 MHz, Chloroform-*d*)  $\delta$  178.28, 148.37, 134.17, 133.03, 131.26, 130.72, 129.18, 128.79, 128.77, 128.64, 120.31, 91.64, 86.74.



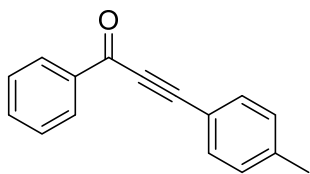

**1-Phenyl-3-(p-tolyl)prop-2-yn-1-one (3ab)<sup>2</sup>:** The general procedure was followed, and flash chromatography (petroleum ether/ethyl acetate = 40/1) afforded 0.170 mmol (85%). Light yellow solid. mp: 65-67 °C. TLC:  $R_f$  = 0.60 (petroleum ether/ethyl acetate = 20/1). <sup>1</sup>H NMR (300 MHz, Chloroform-*d*)  $\delta$  8.32-8.13 (m, 2H), 7.65-7.56 (m, 3H), 7.55-7.47 (m, 2H), 7.21 (d,  $J$  = 7.8 Hz, 2H), 2.39 (s, 3H). <sup>13</sup>C NMR (75 MHz, Chloroform-*d*)  $\delta$  178.13, 141.66, 136.93, 134.11, 133.19, 129.58, 129.55, 128.65, 116.95, 93.94, 86.81, 21.83.

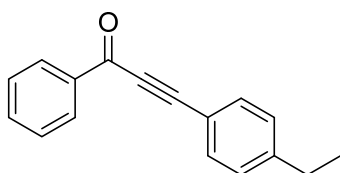

**3-(4-Ethylphenyl)-1-phenylprop-2-yn-1-one (3ac)<sup>18</sup>:** The general procedure was followed, and flash chromatography (petroleum ether/ethyl acetate = 40/1) afforded 0.158 mmol (79%). Light yellow solid. mp: 75-77 °C. TLC:  $R_f$  = 0.60 (petroleum ether/ethyl acetate = 20/1). <sup>1</sup>H NMR (300 MHz, Chloroform-*d*)  $\delta$  8.33-8.15 (m, 2H), 7.66-7.57 (m, 3H), 7.51 (dd,  $J$  = 8.3, 7.0 Hz, 2H), 7.24 (d,  $J$  = 8.0 Hz, 2H), 2.68 (q,  $J$  = 7.6 Hz, 2H), 1.25 (t,  $J$  = 7.6 Hz, 3H). <sup>13</sup>C NMR (75 MHz, Chloroform-*d*)  $\delta$  178.13, 147.83, 134.10, 133.30, 129.58, 128.65, 128.37, 117.19, 93.96, 86.80, 29.08, 15.25.

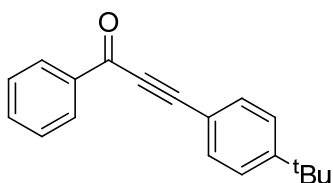

**3-(4-(Tert-butyl)phenyl)-1-phenylprop-2-yn-1-one (3ad)<sup>19</sup>:** The general procedure was followed, and flash chromatography (petroleum ether/ethyl acetate = 40/1) afforded 0.150 mmol (75%). Light yellow oil. TLC:  $R_f$  = 0.60 (petroleum ether/ethyl acetate = 20/1). <sup>1</sup>H NMR (300 MHz, Chloroform-*d*)  $\delta$  8.31-8.12 (m, 2H), 7.70-7.56

(m, 3H), 7.55-7.49 (m, 2H), 7.47-7.40 (m, 2H), 1.34 (s, 9H).  $^{13}\text{C}$  NMR (75 MHz, Chloroform-*d*)  $\delta$  178.19, 154.66, 137.01, 134.12, 133.09, 129.63, 128.68, 125.85, 117.05, 93.93, 86.80, 35.17, 31.12.

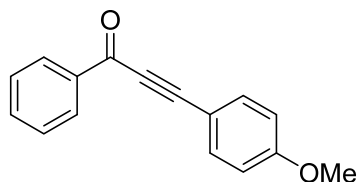

**3-(4-Methoxyphenyl)-1-phenylprop-2-yn-1-one (3ae)<sup>2</sup>:** The general procedure was followed, and flash chromatography (petroleum ether/ethyl acetate = 35/1) afforded 0.156 mmol (78%). Light yellow solid. mp: 82-84 °C. TLC:  $R_f$  = 0.45 (petroleum ether/ethyl acetate = 20/1).  $^1\text{H}$  NMR (300 MHz, Chloroform-*d*)  $\delta$  8.26-8.15 (m, 2H), 7.69-7.55 (m, 3H), 7.54-7.45 (m, 2H), 6.99-6.84 (m, 2H), 3.82 (s, 3H).  $^{13}\text{C}$  NMR (75 MHz, Chloroform-*d*)  $\delta$  178.05, 161.81, 137.10, 135.18, 133.95, 129.50, 128.62, 114.50, 111.89, 95.41, 86.95, 55.46.

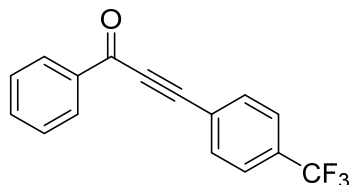

**1-Phenyl-3-(4-(trifluoromethyl)phenyl)prop-2-yn-1-one (3af)<sup>2</sup>:** The general procedure was followed, and flash chromatography (petroleum ether/ethyl acetate = 40/1) afforded 0.080 mmol (40%). Light yellow oil. TLC:  $R_f$  = 0.60 (petroleum ether/ethyl acetate = 20/1).  $^1\text{H}$  NMR (300 MHz, Chloroform-*d*)  $\delta$  8.25-8.16 (m, 2H), 7.82-7.73 (m, 2H), 7.71-7.60 (m, 3H), 7.56-7.47 (m, 2H).  $^{13}\text{C}$  NMR (75 MHz, Chloroform-*d*)  $\delta$  177.71, 136.69, 134.54, 133.26, 132.32 (d,  $J$  = 32.9 Hz), 129.70, 128.84, 125.71 (q,  $J$  = 3.8 Hz), 122.96 (d,  $J$  = 166.0 Hz), 90.53, 88.20.

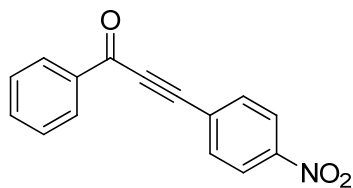

**3-(4-Nitrophenyl)-1-phenylprop-2-yn-1-one (3ag)<sup>20</sup>:** The general procedure was followed, and flash chromatography (petroleum ether/ethyl acetate = 35/1) afforded 0.068 mmol (34%). Light yellow solid. mp: 145-147 °C. TLC:  $R_f$  = 0.50 (petroleum ether/ethyl acetate = 20/1). <sup>1</sup>H NMR (300 MHz, Chloroform-*d*)  $\delta$  8.29 (d,  $J$  = 9.0 Hz, 2H), 8.22-8.17 (m, 2H), 7.83 (d,  $J$  = 9.0 Hz, 2H), 7.70-7.63 (m, 1H), 7.57-7.51 (m, 2H). <sup>13</sup>C NMR (75 MHz, Chloroform-*d*)  $\delta$  177.50, 148.66, 136.52, 134.80, 133.79, 129.77, 128.95, 126.91, 123.96, 89.98, 89.32.

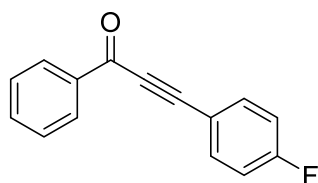

**3-(4-Fluorophenyl)-1-phenylprop-2-yn-1-one (3ah)<sup>2</sup>:** The general procedure was followed, and flash chromatography (petroleum ether/ethyl acetate = 40/1) afforded 0.132 mmol (66%). Light yellow solid. mp: 80-82 °C. TLC:  $R_f$  = 0.60 (petroleum ether/ethyl acetate = 20/1). <sup>1</sup>H NMR (300 MHz, Chloroform-*d*)  $\delta$  8.26-8.17 (m, 2H), 7.74-7.67 (m, 2H), 7.66-7.58 (m, 1H), 7.58-7.45 (m, 2H), 7.20-7.05 (m, 2H). <sup>13</sup>C NMR (75 MHz, Chloroform-*d*)  $\delta$  178.04, 164.13 (d,  $J$  = 253.9 Hz), 136.86, 135.50 (d,  $J$  = 8.9 Hz), 134.34, 129.67, 128.78, 116.53, 116.23, 92.14, 86.91.

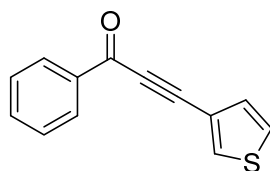

**1-Phenyl-3-(thiophen-3-yl)prop-2-yn-1-one (3ai)<sup>21</sup>:** The general procedure was followed, and flash chromatography (petroleum ether/ethyl acetate = 30/1) afforded 0.136 mmol (68%). Brown oil. TLC:  $R_f$  = 0.40 (petroleum ether/ethyl acetate = 20/1). <sup>1</sup>H NMR (300 MHz, Chloroform-*d*)  $\delta$  8.32-8.12 (m, 2H), 7.84 (dd,  $J$  = 2.9, 1.3 Hz,

1H), 7.68-7.56 (m, 1H), 7.56-7.44 (m, 2H), 7.37 (dd,  $J = 5.0, 2.9$  Hz, 1H), 7.31 (dd,  $J = 5.0, 1.2$  Hz, 1H).  $^{13}\text{C}$  NMR (75 MHz, Chloroform-*d*)  $\delta$  178.07, 136.95, 134.18, 134.00, 130.37, 129.62, 128.71, 126.38, 119.49, 88.61, 87.28.

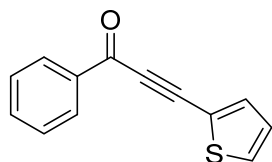

**1-Phenyl-3-(thiophen-2-yl)prop-2-yn-1-one (3aj)**<sup>22</sup>: The general procedure was followed, and flash chromatography (petroleum ether/ethyl acetate = 30/1) afforded 0.150 mmol (75%). Brown oil. TLC:  $R_f = 0.40$  (petroleum ether/ethyl acetate = 20/1).  $^1\text{H}$  NMR (300 MHz, Chloroform-*d*)  $\delta$  8.27-8.07 (m, 2H), 7.67-7.59 (m, 1H), 7.58 (dd,  $J = 3.7, 1.2$  Hz, 1H), 7.55-7.46 (m, 3H), 7.10 (dd,  $J = 5.1, 3.7$  Hz, 1H).  $^{13}\text{C}$  NMR (75 MHz, Chloroform-*d*)  $\delta$  177.63, 136.83, 134.21, 131.78, 129.55, 128.74, 127.89, 119.97, 91.75, 87.14.

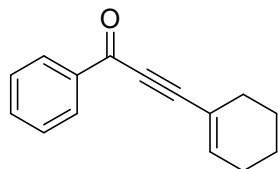

**3-cyclohexenyl-1-phenylprop-2-yn-1-one (3ak)**<sup>23</sup>: The general procedure was followed, and flash chromatography (petroleum ether/ethyl acetate = 40/1) afforded 0.110 mmol (55%). Light yellow oil. TLC:  $R_f = 0.55$  (petroleum ether/ethyl acetate = 20/1).  $^1\text{H}$  NMR (300 MHz, Chloroform-*d*)  $\delta$  8.13 (d,  $J = 7.6$  Hz, 2H), 7.58 (t,  $J = 7.3$  Hz, 1H), 7.46 (t,  $J = 7.5$  Hz, 2H), 6.63-6.53 (m, 1H), 2.30-2.16 (m, 4H), 1.73-1.56 (m, 4H).  $^{13}\text{C}$  NMR (75 MHz, Chloroform-*d*)  $\delta$  178.28, 142.83, 137.08, 133.91, 129.52, 128.57, 119.19, 95.86, 85.26, 28.45, 26.25, 22.01, 21.16.

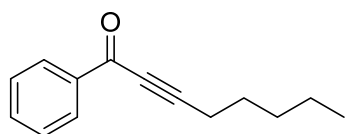

**1-Phenyl-oct-2-yn-1-one (3al)**<sup>24</sup>: The general procedure was followed, and flash

chromatography (petroleum ether/ethyl acetate = 40/1) afforded 0.124 mmol (62%). Light yellow oil. TLC:  $R_f$  = 0.65 (petroleum ether/ethyl acetate = 20/1).  $^1\text{H}$  NMR (300 MHz, Chloroform-*d*)  $\delta$  8.13 (d,  $J$  = 7.1 Hz, 2H), 7.58 (t,  $J$  = 7.4 Hz, 1H), 7.46 (t,  $J$  = 7.5 Hz, 2H), 2.48 (t,  $J$  = 7.1 Hz, 2H), 1.72-1.61 (m, 2H), 1.49-1.32 (m, 4H), 0.92 (t,  $J$  = 7.1 Hz, 3H).  $^{13}\text{C}$  NMR (75 MHz, Chloroform-*d*)  $\delta$  178.33, 137.00, 133.95, 129.62, 128.56, 97.00, 79.75, 31.19, 27.59, 22.21, 19.26, 14.00.

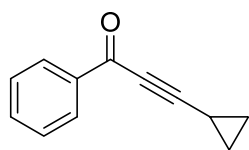

**3-Cyclopropyl-1-phenylprop-2-yn-1-one (3am)<sup>2</sup>:** The general procedure was followed, and flash chromatography (petroleum ether/ethyl acetate = 40/1) afforded 0.100 mmol (50%). Light yellow oil. TLC:  $R_f$  = 0.60 (petroleum ether/ethyl acetate = 20/1).  $^1\text{H}$  NMR (300 MHz, Chloroform-*d*)  $\delta$  8.09 (d,  $J$  = 7.1 Hz, 2H), 7.57 (t,  $J$  = 7.4 Hz, 1H), 7.45 (t,  $J$  = 7.5 Hz, 2H), 1.60-1.44 (m, 1H), 1.10-0.95 (m, 4H).  $^{13}\text{C}$  NMR (75 MHz, Chloroform-*d*)  $\delta$  178.04, 136.91, 133.88, 129.49, 128.52, 101.27, 75.57, 10.01, 0.08.

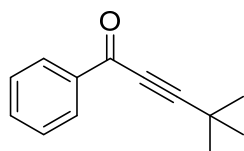

**4,4-Dimethyl-1-phenylpent-2-yn-1-one (3an)<sup>25</sup>:** The general procedure was followed, and flash chromatography (petroleum ether/ethyl acetate = 40/1) afforded 0.086 mmol (43%). Light yellow oil. TLC:  $R_f$  = 0.60 (petroleum ether/ethyl acetate = 20/1).  $^1\text{H}$  NMR (300 MHz, Chloroform-*d*)  $\delta$  8.12 (d,  $J$  = 8.2 Hz, 2H), 7.59 (t,  $J$  = 7.4 Hz, 1H), 7.47 (t,  $J$  = 7.7 Hz, 2H), 1.38 (s, 9H).  $^{13}\text{C}$  NMR (75 MHz, Chloroform-*d*)  $\delta$  178.49, 137.05, 133.94, 129.60, 128.57, 104.09, 78.16, 30.25, 28.13.

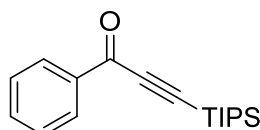

**1-Phenyl-3-(triisopropylsilyl)prop-2-yn-1-one (3a'o)**<sup>11</sup>: The general procedure was followed, and flash chromatography (petroleum ether/ethyl acetate = 40/1) afforded 0.120 mmol (60%). Light yellow oil. TLC:  $R_f$  = 0.60 (petroleum ether/ethyl acetate = 20/1). <sup>1</sup>H NMR (300 MHz, Chloroform-*d*)  $\delta$  8.18 (d,  $J$  = 7.6 Hz, 2H), 7.61 (t,  $J$  = 7.4 Hz, 1H), 7.48 (t,  $J$  = 7.6 Hz, 2H), 1.22-1.08 (m, 21H). <sup>13</sup>C NMR (75 MHz, Chloroform-*d*)  $\delta$  177.60, 136.77, 134.18, 129.62, 128.67, 103.09, 98.07, 18.65, 11.17.

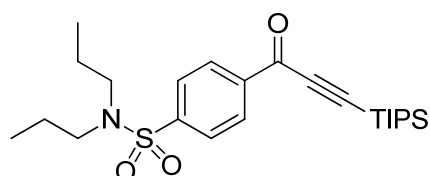

**N,N-Dipropyl-4-(3-(triisopropylsilyl)propioloyl)benzenesulfonamide (3e'o)**: The general procedure was followed, and flash chromatography (petroleum ether/ethyl acetate = 30/1) afforded 0.098 mmol (49%). Colorless oil. TLC:  $R_f$  = 0.35 (petroleum ether/ethyl acetate = 20/1). <sup>1</sup>H NMR (300 MHz, Chloroform-*d*)  $\delta$  8.27 (d,  $J$  = 8.4 Hz, 2H), 7.92 (d,  $J$  = 8.3 Hz, 2H), 3.22-3.01 (m, 4H), 1.65-1.47 (m, 6H), 1.24-1.13 (m, 19H), 0.88 (t,  $J$  = 7.4 Hz, 6H). <sup>13</sup>C NMR (75 MHz, Chloroform-*d*)  $\delta$  176.17, 145.24, 139.35, 130.13, 127.39, 102.74, 100.35, 50.17, 22.16, 18.71, 11.26. IR (cm<sup>-1</sup>) 2943, 2148, 1649. HRMS (MALDI)  $m/z$  [M+H]<sup>+</sup> calcd for C<sub>24</sub>H<sub>39</sub>NO<sub>3</sub>SSi: 450.2498, found: 450.2488.

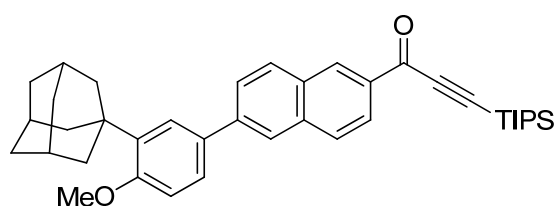

**1-(6-(3-((3r,5r,7r)-Adamantan-1-yl)-4-methoxyphenyl)naphthalen-2-yl)-3-(triisopropylsilyl)prop-2-yn-1-one (3f'o)**: The general procedure was followed, and flash chromatography (petroleum ether/ethyl acetate = 40/1) afforded 0.142 mmol (71%). Light yellow oil. TLC:  $R_f$  = 0.50 (petroleum ether/ethyl acetate = 20/1). <sup>1</sup>H NMR (300 MHz, Chloroform-*d*)  $\delta$  8.80 (s, 1H), 8.18 (dd,  $J$  = 8.6, 1.6 Hz, 1H), 8.09-7.97 (m, 2H), 7.94 (d,  $J$  = 8.6 Hz, 1H), 7.83 (dd,  $J$  = 8.5, 1.6 Hz, 1H), 7.62 (d,  $J$  = 2.2 Hz, 1H), 7.56

(dd,  $J = 8.4, 2.3$  Hz, 1H), 7.01 (d,  $J = 8.5$  Hz, 1H), 3.91 (s, 3H), 2.25-2.17 (m, 6H), 2.12 (s, 3H), 1.82 (s, 6H), 1.27-1.20 (m, 21H).  $^{13}\text{C}$  NMR (75 MHz, Chloroform- $d$ )  $\delta$  177.50, 159.25, 142.37, 139.25, 136.76, 134.22, 132.96, 132.53, 131.29, 130.37, 128.66, 126.86, 126.14, 125.91, 124.98, 124.35, 112.32, 103.51, 97.92, 55.32, 40.78, 37.39, 37.29, 29.28, 18.78, 11.36. IR ( $\text{cm}^{-1}$ ) 2903, 2141, 1623. HRMS (MALDI)  $m/z$   $[\text{M}+\text{H}]^+$  calcd for  $\text{C}_{39}\text{H}_{48}\text{O}_2\text{Si}$ : 577.3502, found: 577.3502.

## 6. Reference

1. W.-X. Zheng, J. Zhong, Y.-T. Yang, M. Luobu, Y. Zhang, Y.-H. Wang and Q.-W. Wang, Palladium-Catalyzed Synthesis of Aryl Ketones from Carboxylic Acids and Arylboronic Acids Using 2-Chloroimidazolium Chloride as a Coupling Reagent, *Synthesis* 2022, **54**, 4371-4380.
2. S. Tang, L. Zeng, Y.-C. Liu and A.-W. Lei, Zinc-Catalyzed Dehydrogenative Cross-Coupling of Terminal Alkynes with Aldehydes: Access to Ynones, *Angew. Chem. Int. Ed.*, 2015, **54**, 15850-15853.
3. L. Li, S. Guo, Q. Wang and J. Zhu, Acyl Radicals from Benzothiazolines: Synthons for Alkylation, Alkenylation, and Alkynylation Reactions, *Org. Lett.*, 2019, **21**, 5462-5466.
4. C.-Y. Zhang, J.-H. Liu and C.-G. Xia, Aryl-palladium-NHC complex: efficient phosphine-free catalyst precursors for the carbonylation of aryl iodides with amines or alkynes, *Org. Biomol. Chem.*, 2014, **12**, 9702-9706.
5. T. Tang, X.-D. Fei, Z.-Y. Ge, Z. Chen, Y.-M. Zhu and S.-J. Ji, Palladium-Catalyzed Carbonylative Sonogashira Coupling of Aryl Bromides via tert-Butyl Isocyanide Insertion, *J. Org. Chem.*, 2013, **78**, 3170-3175.
6. H. Tan, H.-J. Li, W.-Q. Ji and L. Wang, Sunlight-Driven Decarboxylative Alkynylation of  $\alpha$ -Keto Acids with Bromoacetylenes by Hypervalent Iodine Reagent Catalysis: A Facile Approach to Ynones, *Angew. Chem. Int. Ed.*, 2015, **54**, 8374 -8377.

7. D. A. Alonso, C. Na'jera and M. C. Pacheco, Synthesis of Yrones by Palladium-Catalyzed Acylation of Terminal Alkynes with Acid Chlorides, *J. Org. Chem.*, 2004, **69**, 1615-1619.
8. Y. Chen, C.-L. Huang, X.-C. Liu, E. Perl, Z.-W. Chen, J. Namgung, G. Subramaniam, G. Zhang and W. H. Hersh, Synthesis of Dibenzocyclohepten-5-ones by Electrophilic Iodocyclization of 1-([1,1'-Biphenyl]-2-yl)alkynones, *J. Org. Chem.*, 2014, **79**, 3452-3464.
9. M.-T. Meng, G.-F. Wang, L.-F. Yang, K. Chen and C.-Z. Qi, Silver-catalyzed Double Decarboxylative Radical Alkynylation/Annulation of Arylpropionic Acids with  $\alpha$ -keto Acids: Access to Yrones and Flavones under Mild Conditions, *Adv. Synth. Catal.*, 2018, **360**, 1218-1231.
10. C.-Y. Han, M. Yu, W.-J. Sun and X.-Q. Yao, Ligand-Promoted, Copper Nanoparticles Catalyzed Oxidation of Propargylic Alcohols with TBHP or Air as Oxidant, *Synlett.*, 2011, **16**, 2363-2368.
11. S. Mukherjee, R. A. Garza-Sanchez, A. Tlahuext-Aca and F. Glorius, Alkynylation of  $C_{sp^2}$  (O)-H Bonds Enabled by Photoredox-Mediated Hydrogen-Atom Transfer, *Angew. Chem. Int. Ed.*, 2017, **56**, 14723-14726.
12. Y.-G. Zhu, B.-G. Zhao and Y.-A. Shi, Highly Efficient Cu(I)-Catalyzed Oxidation of Alcohols to Ketones and Aldehydes with Diaziridinone, *Org. Lett.*, 2013, **15**, 992-995.
13. W. Dai, Y. Lv, L.-Y. Wang, S.-S. Shang, B. Chen, G.-S. Li and S. Gao, Highly efficient oxidation of alcohols catalyzed by a porphyrin-inspired manganese complex, *Chem. Commun.*, 2015, **51**, 11268-11271.
14. Y. Yu, W.-B. Yang, D. Pflästerer and A. S. K. Hashmi, Dehydrogenative Meyer-Schuster-Like Rearrangement: A Gold-Catalyzed Reaction Generating an Alkyne, *Angew. Chem. Int. Ed.*, 2014, **53**, 1144-1147.
15. Y. Sadamitsu, K. Komatsuki, K. Saito and T. Yamada, Access to Tetrionic Acids via Silver-Catalyzed  $CO_2$  Incorporation into Conjugated Yrones, *Org. Lett.*, 2017, **19**, 3191-3194.
16. A. S. Levashov and D. S. Buryi, Lewis acid promoted reaction of



- tetraalkynylstannanes with acyl chlorides: An effective approach towards alkynyl ketones, *Tetrahedron Lett.*, 2017, **58**, 4476-4478.
17. F. Gao and Y. Huang, A Sulfur Ylides-Mediated Domino Benzannulation Strategy to Construct Biaryls, Alkenylated and Alkynylated Benzene Derivatives, *Adv. Synth. Catal.*, 2014, **356**, 2422-2428.
  18. G.-L. Sun, M. Lei and L.-H. Hu, A facile and efficient method for the synthesis of alkynone by carbonylative Sonogashira coupling using  $\text{CHCl}_3$  as the CO source, *RSC Adv.*, 2016, **6**, 28442-28446.
  19. O. Obulesu, V. Murugesu, B. Harish and S. Suresh, Tandem Aza Michael Addition-Vinylogous Nitroaldol Condensation: Construction of Highly Substituted *N*-Fused 3-Nitropyrizolopyridines, *J. Org. Chem.*, 2018, **83**, 6454-6465.
  20. Y. Ogiwara, M. Kubota, K. Kurogi, T. Konakahara and N. Sakai, Oxidative Coupling of Terminal Alkynes with Aldehydes Leading to Alkynyl Ketones by Using Indium(III) Bromide, *Chem. Eur. J.*, 2015, **21**, 18598-18600.
  21. M. Cui, H.-X. Wu, J.-S. Jian, H. Wang, C. Liu, S. Daniel and Z. Zeng, Palladium-catalyzed Sonogashira coupling of amides: access to ynones via C–N bond cleavage, *Chem. Commun.*, 2016, **52**, 12076-12079.
  22. Y. Nishihara, D. Saito, E. Inoue, Y. Okada, M. Miyazaki, Y. Inoue and K. Takagi, Palladium- and base-free synthesis of conjugated ynones by cross-coupling reactions of alkynylboronates with acid chlorides mediated by  $\text{CuCl}$ , *Tetrahedron Lett.*, 2010, **51**, 306-308.
  23. E. N. Marvell, T. Gosink, P. Churchley and T. H. Li, Semihydrogenation of 1-Phenyl-4-penten-2-yn-1-one and of 1-Phenyl-3-(cyclohexen-1-yl)-2-propynone, *J. Org. Chem.*, 1972, **37**, 2989-2992.
  24. B.-M. Wang, M. Bonin and L. Micouin, A Straightforward Synthesis of Ynones by Reaction of Dimethylalkynylaluminum Reagents with Acid Chlorides, *J. Org. Chem.*, 2005, **70**, 6126-6128.
  25. H.-C. Huang, G.-J. Zhang and Y.-Y. Chen, Dual Hypervalent Iodine(III) Reagents and Photoredox Catalysis Enable Decarboxylative Ynonylation under Mild

Conditions, *Angew. Chem. Int. Ed.*, 2015, **54**, 7872-7876.

## 7. Copies of $^1\text{H}$ NMR, $^{19}\text{F}$ NMR and $^{13}\text{C}$ NMR of compounds

### 1,3-Diphenylprop-2-yn-1-one (3aa) $^1\text{H}$ NMR (300 MHz, $\text{CDCl}_3$ )

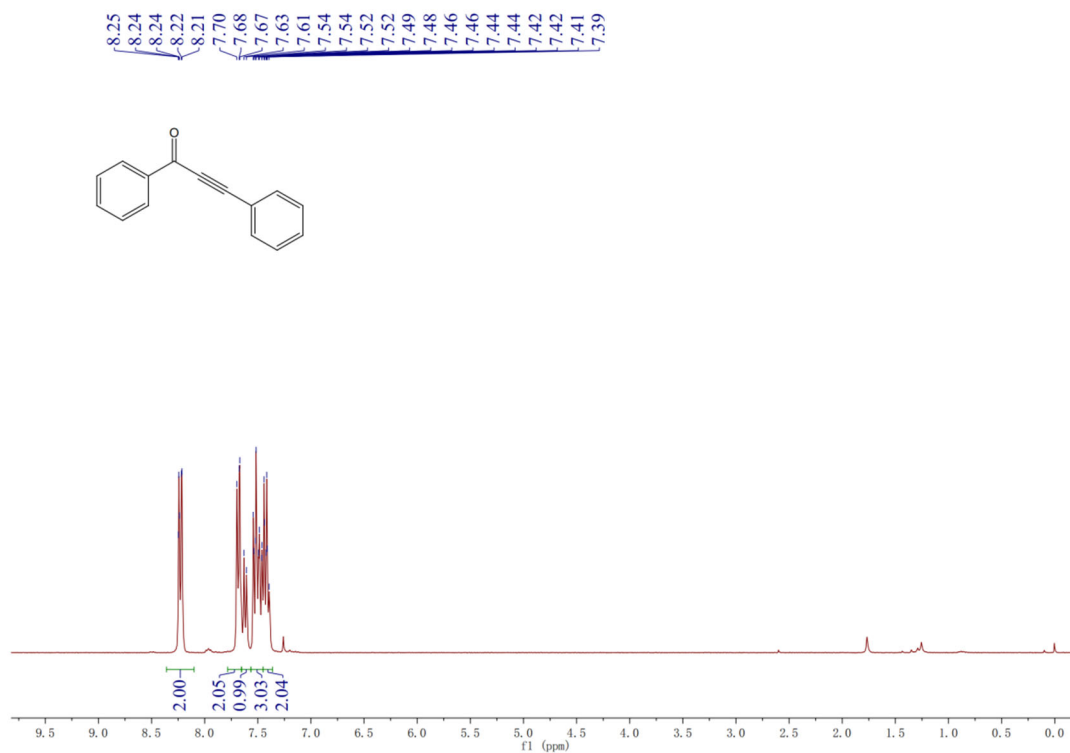

### 1,3-Diphenylprop-2-yn-1-one (3aa) $^{13}\text{C}$ NMR (75 MHz, $\text{CDCl}_3$ )

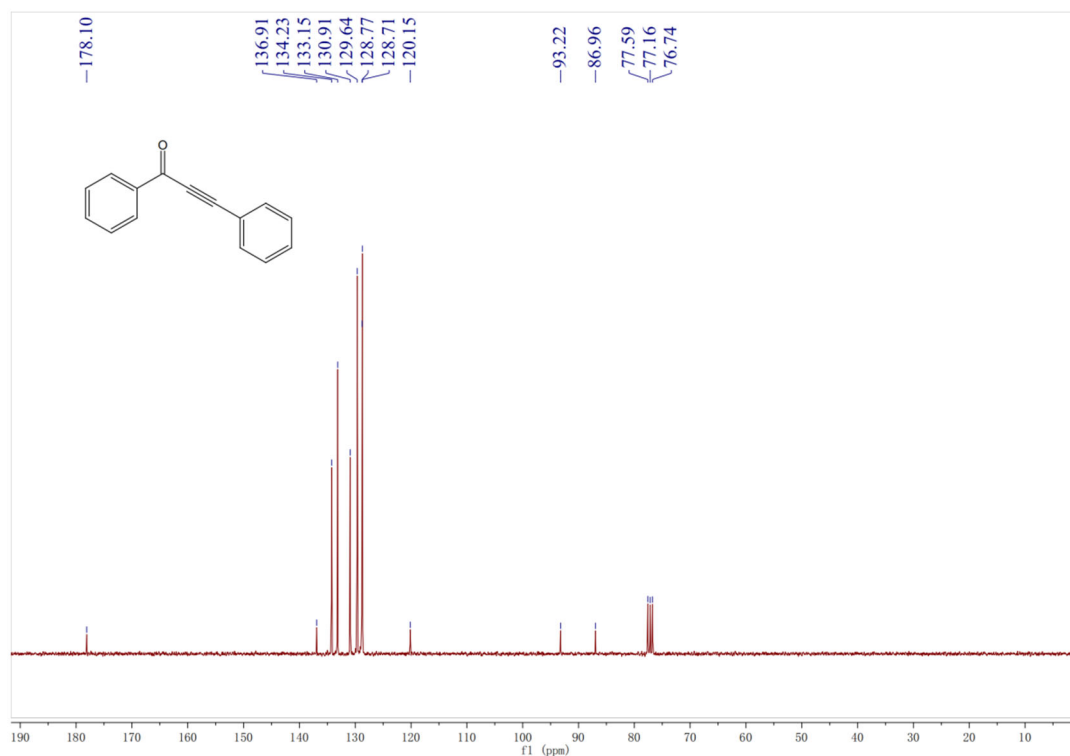

**3-Phenyl-1-(p-tolyl)prop-2-yn-1-one (3ba) <sup>1</sup>H NMR (300 MHz, CDCl<sub>3</sub>)**

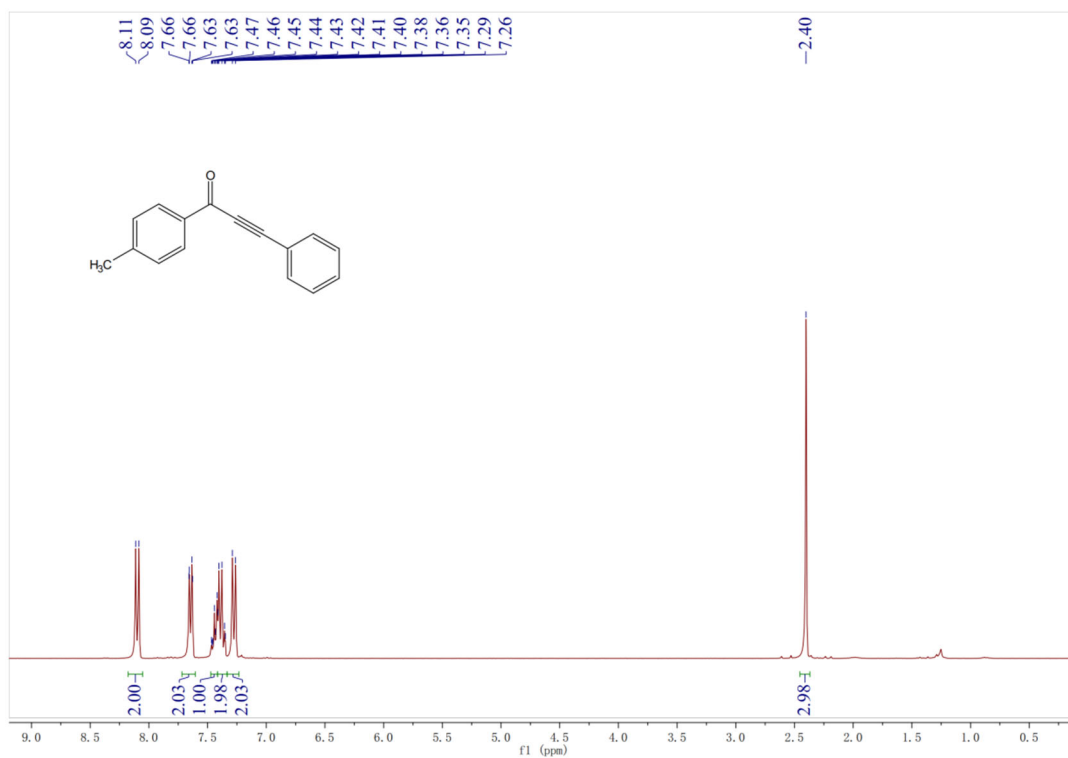

**3-Phenyl-1-(p-tolyl)prop-2-yn-1-one (3ba) <sup>13</sup>C NMR (75 MHz, CDCl<sub>3</sub>)**

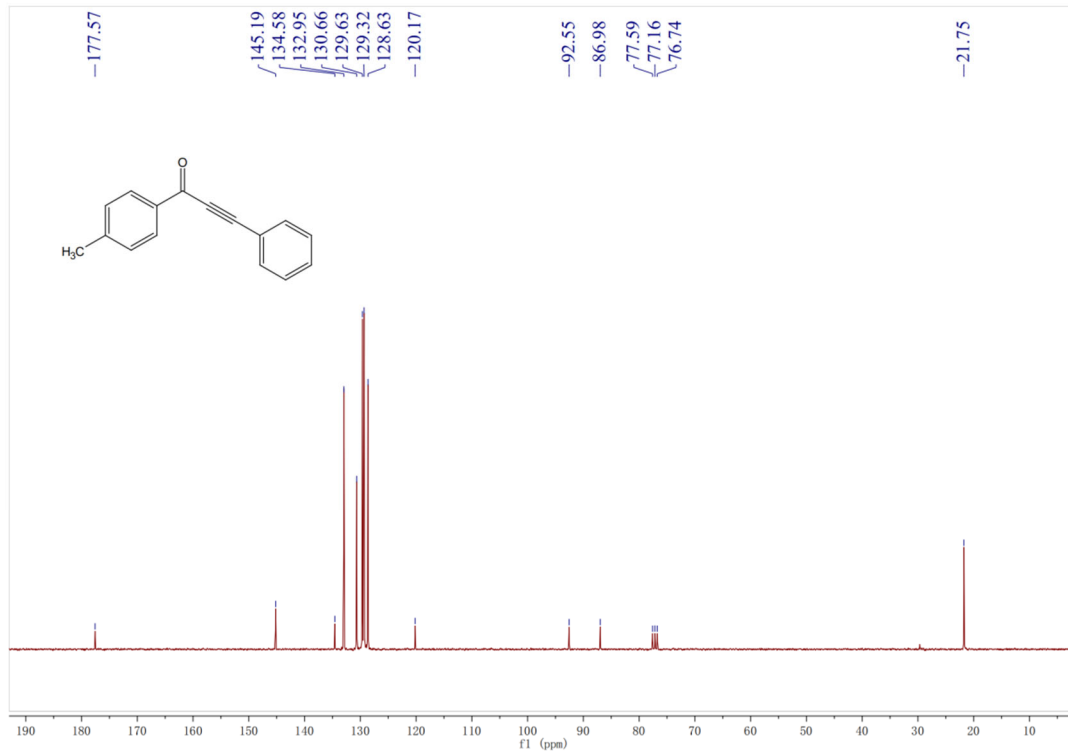

**3-Phenyl-1-(m-tolyl)prop-2-yn-1-one (3ca) <sup>1</sup>H NMR (300 MHz, CDCl<sub>3</sub>)**

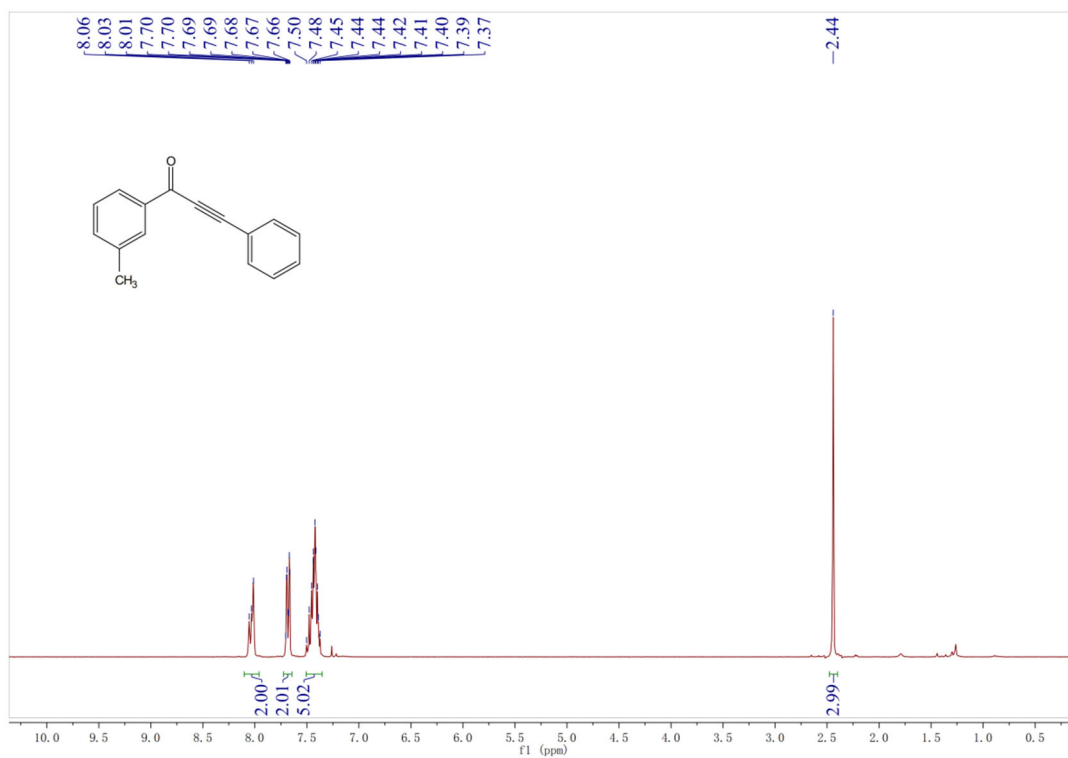

**3-Phenyl-1-(m-tolyl)prop-2-yn-1-one (3ca) <sup>13</sup>C NMR (75 MHz, CDCl<sub>3</sub>)**

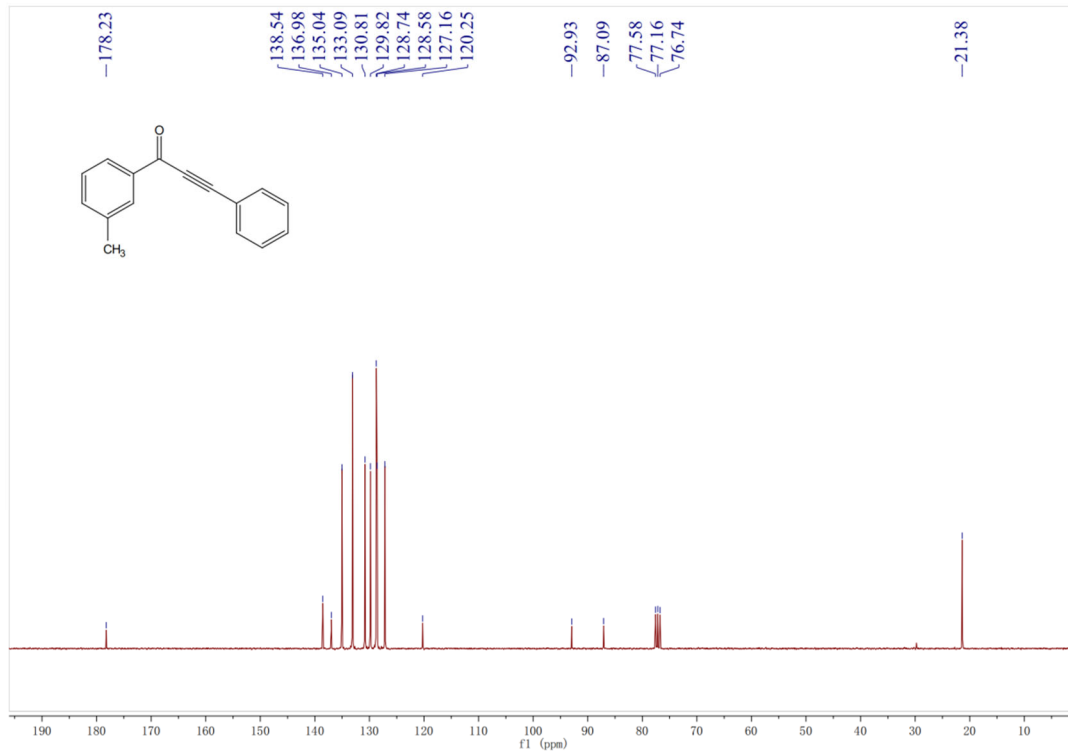

**3-Phenyl-1-(o-tolyl)prop-2-yn-1-one (3da) <sup>1</sup>H NMR (300 MHz, CDCl<sub>3</sub>)**

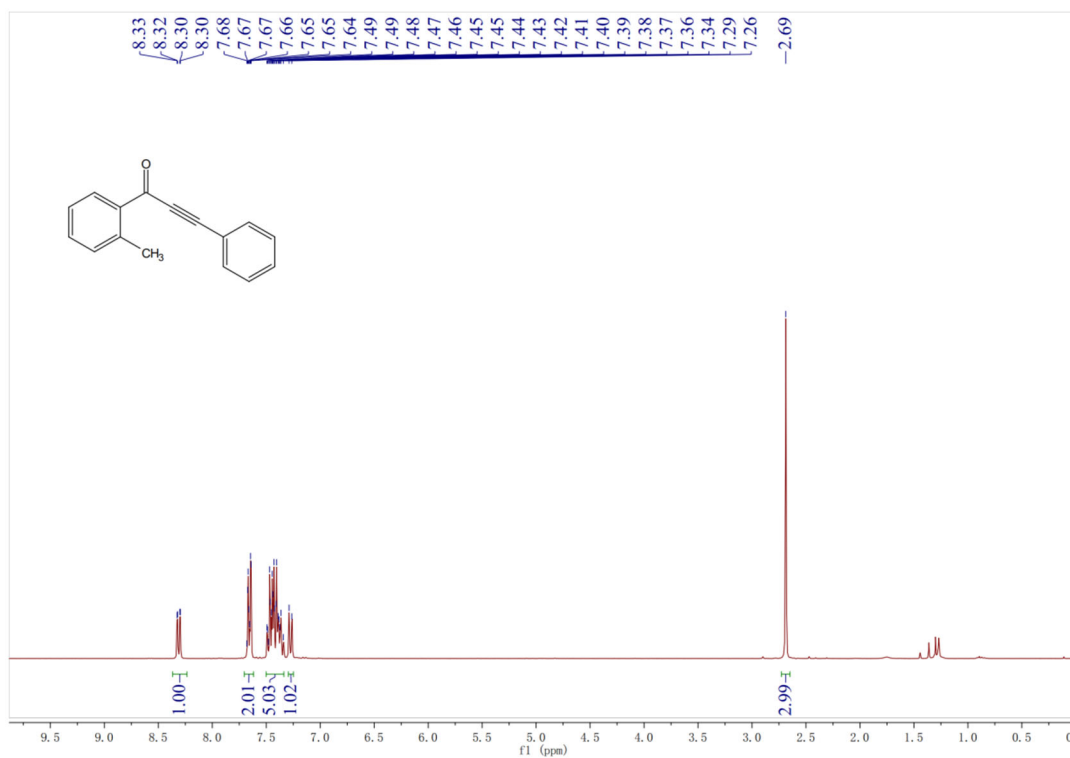

**3-Phenyl-1-(o-tolyl)prop-2-yn-1-one (3da) <sup>13</sup>C NMR (75 MHz, CDCl<sub>3</sub>)**

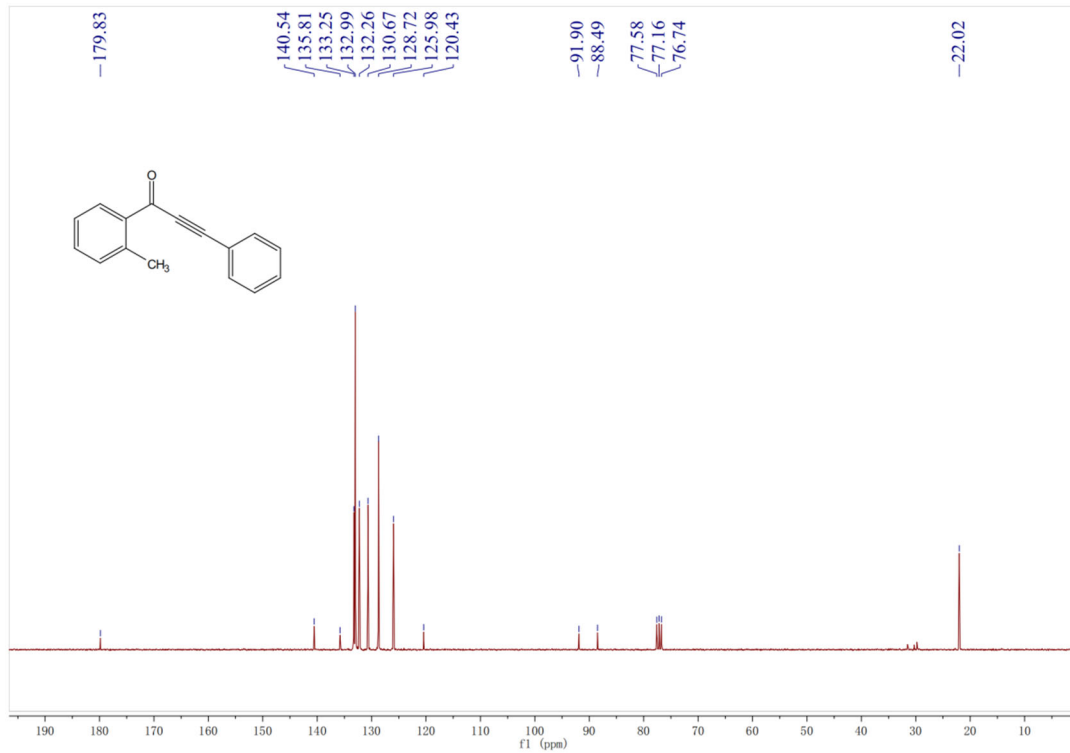

**1-(2,4-Dimethylphenyl)-3-phenylprop-2-yn-1-one (3ea) <sup>1</sup>H NMR (300 MHz, CDCl<sub>3</sub>)**

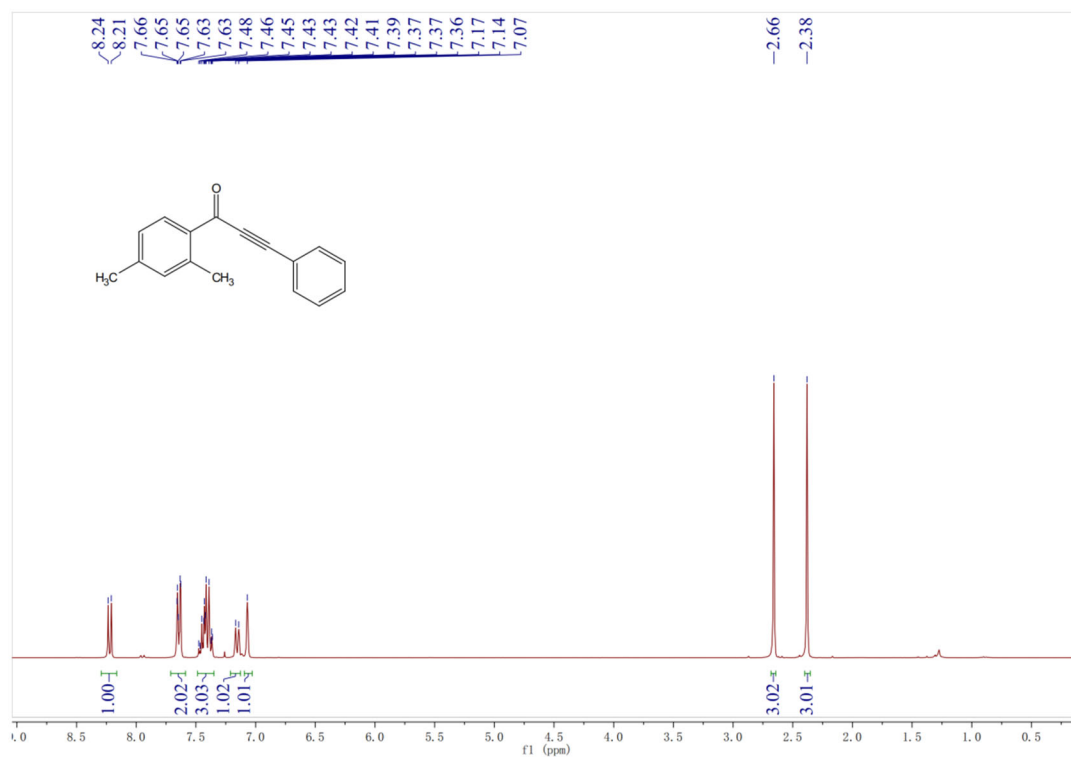

**1-(2,4-Dimethylphenyl)-3-phenylprop-2-yn-1-one (3ea) <sup>13</sup>C NMR (75 MHz, CDCl<sub>3</sub>)**

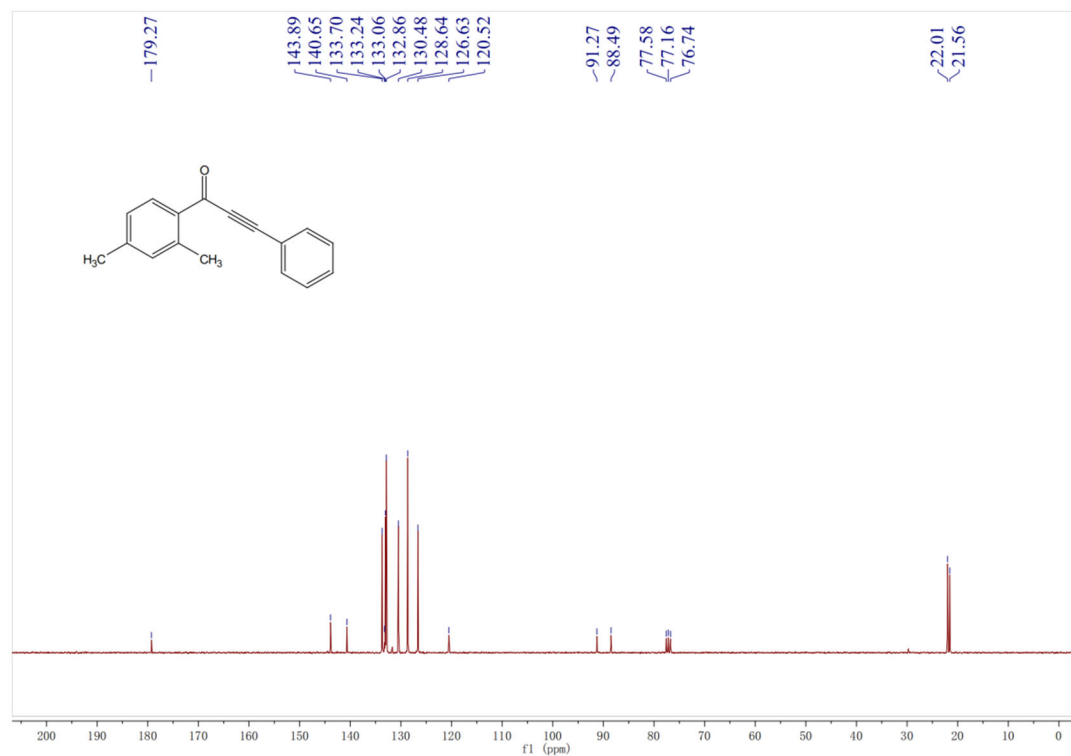

**1-(3,5-Dimethylphenyl)-3-phenylprop-2-yn-1-one (3fa) <sup>1</sup>H NMR (300 MHz, CDCl<sub>3</sub>)**

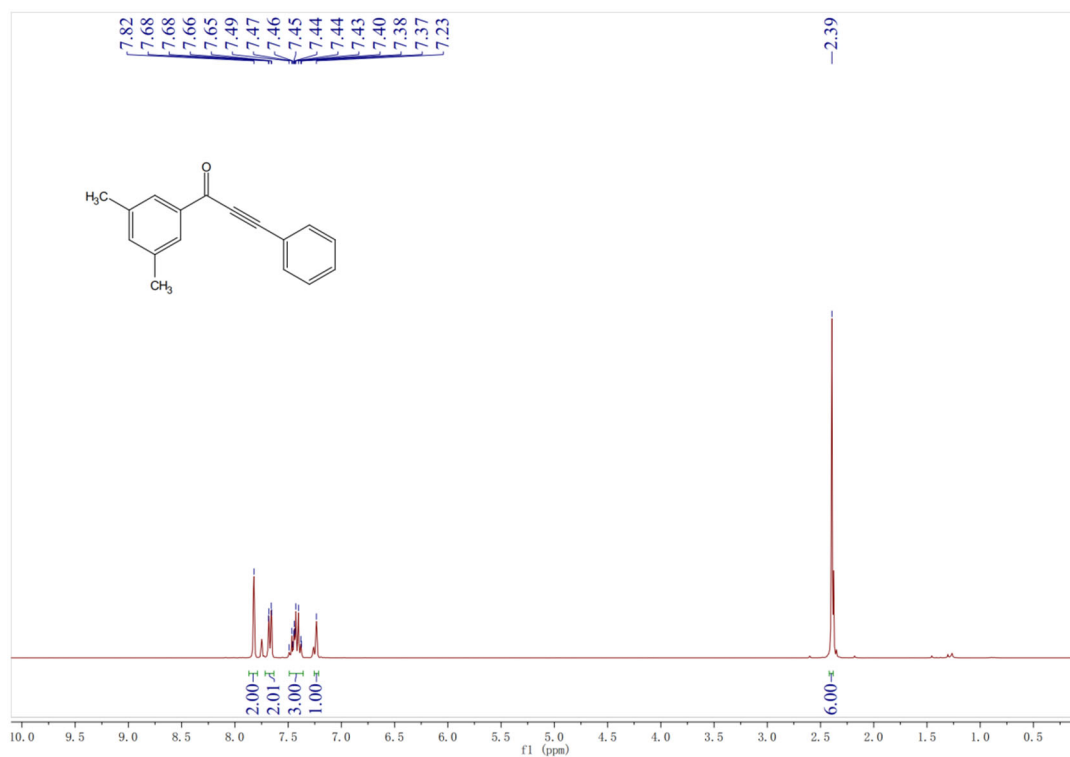

**1-(3,5-Dimethylphenyl)-3-phenylprop-2-yn-1-one (3fa) <sup>13</sup>C NMR (75 MHz, CDCl<sub>3</sub>)**

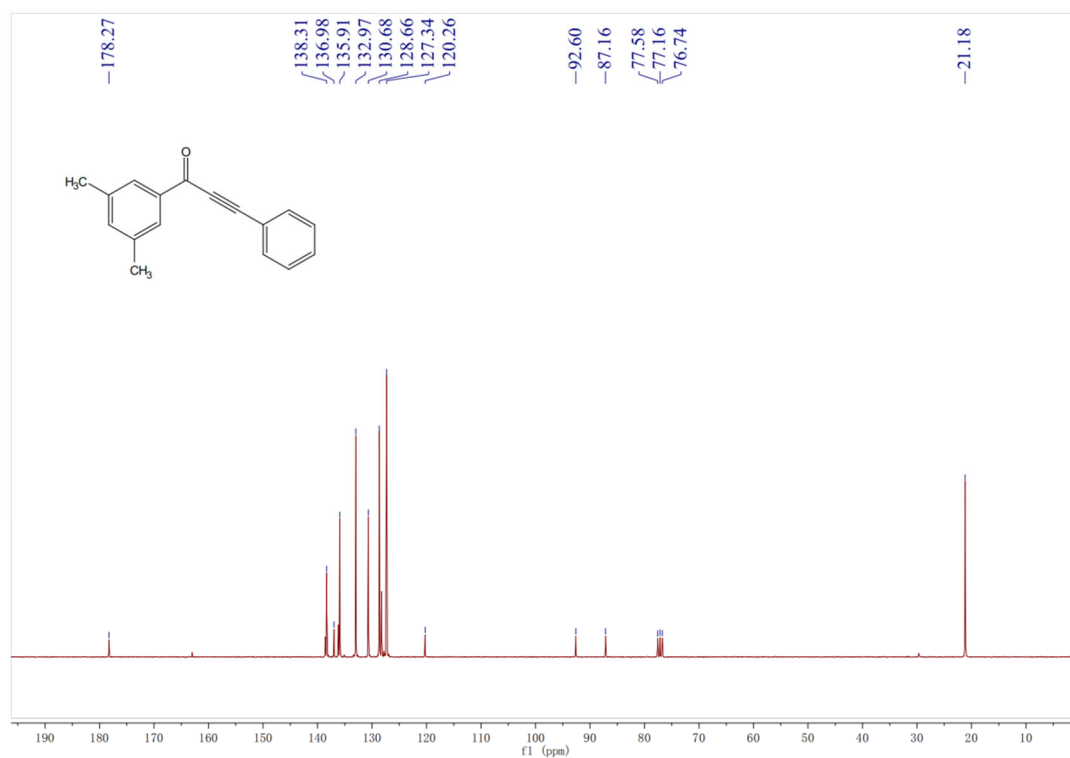



**1-(4-(Tert-butyl)phenyl)-3-phenylprop-2-yn-1-one (3ga) <sup>1</sup>H NMR (300 MHz, CDCl<sub>3</sub>)**

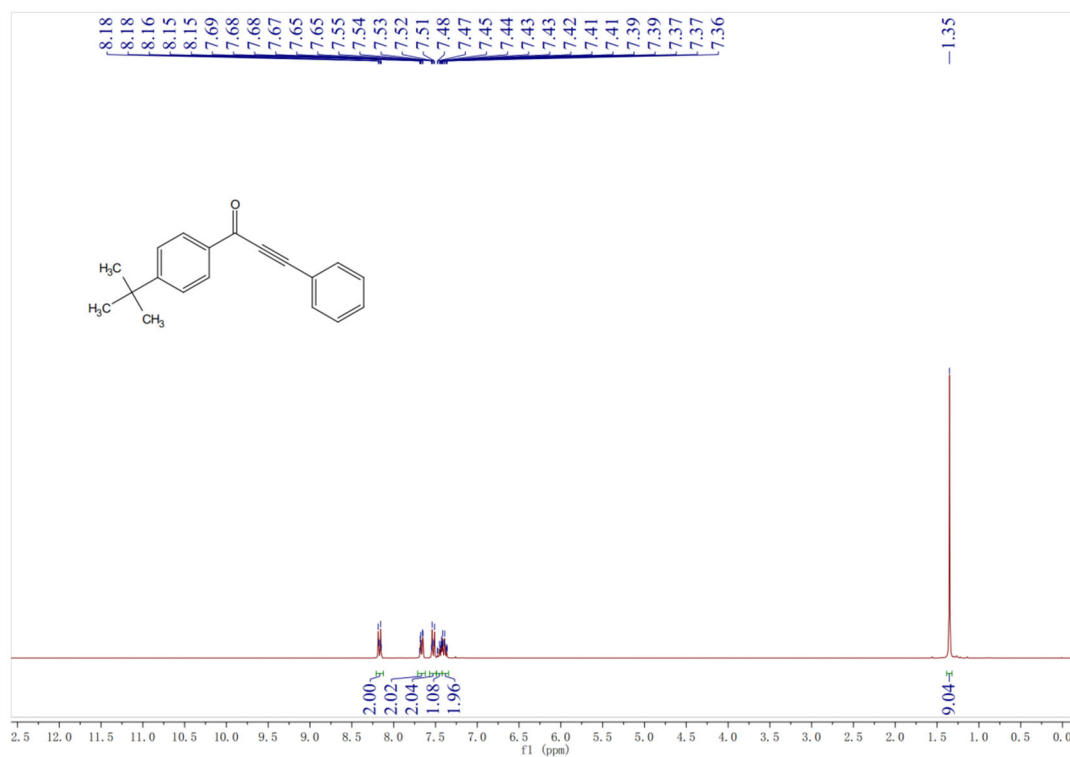

**1-(4-(Tert-butyl)phenyl)-3-phenylprop-2-yn-1-one (3ga) <sup>13</sup>C NMR (75 MHz, CDCl<sub>3</sub>)**

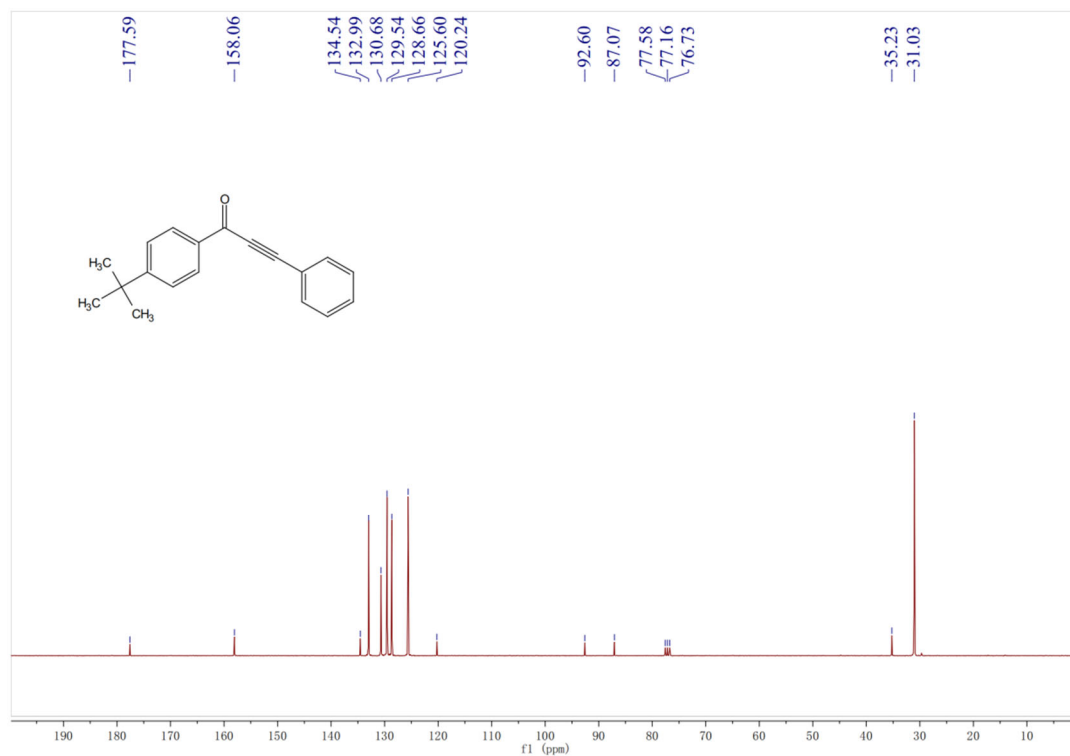

**1-(4-Ethylphenyl)-3-phenylprop-2-yn-1-one (3ha) <sup>1</sup>H NMR (300 MHz, CDCl<sub>3</sub>)**

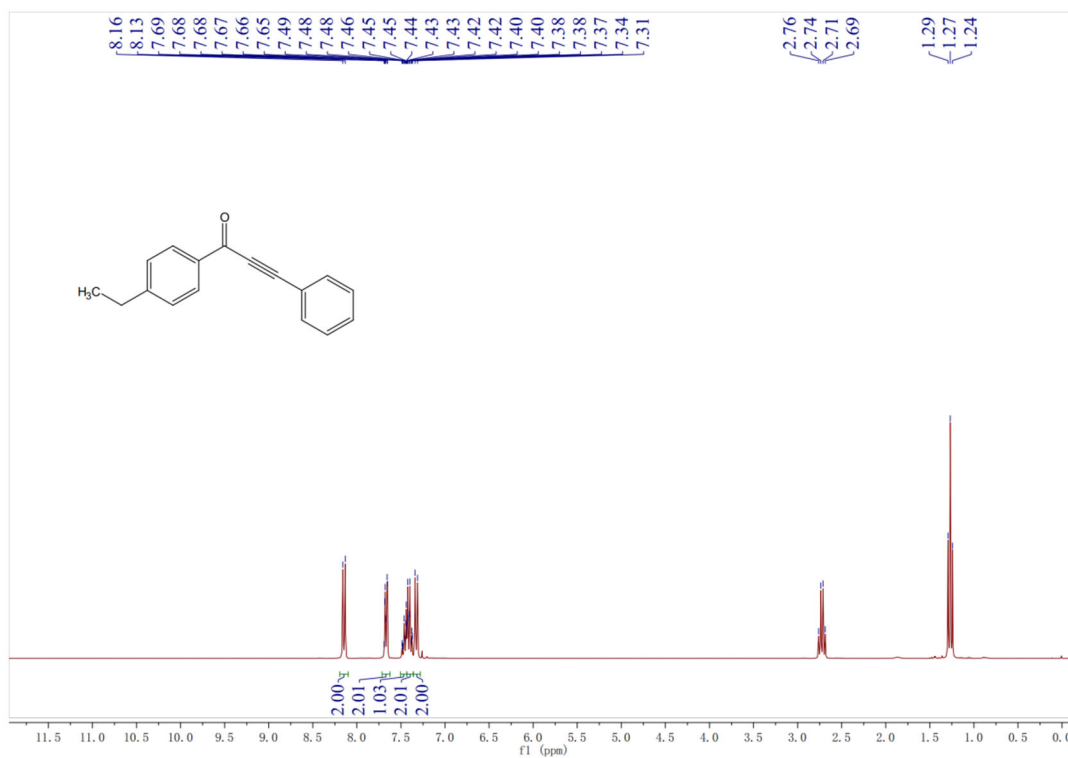

**1-(4-Ethylphenyl)-3-phenylprop-2-yn-1-one (3ha) <sup>13</sup>C NMR (75 MHz, CDCl<sub>3</sub>)**

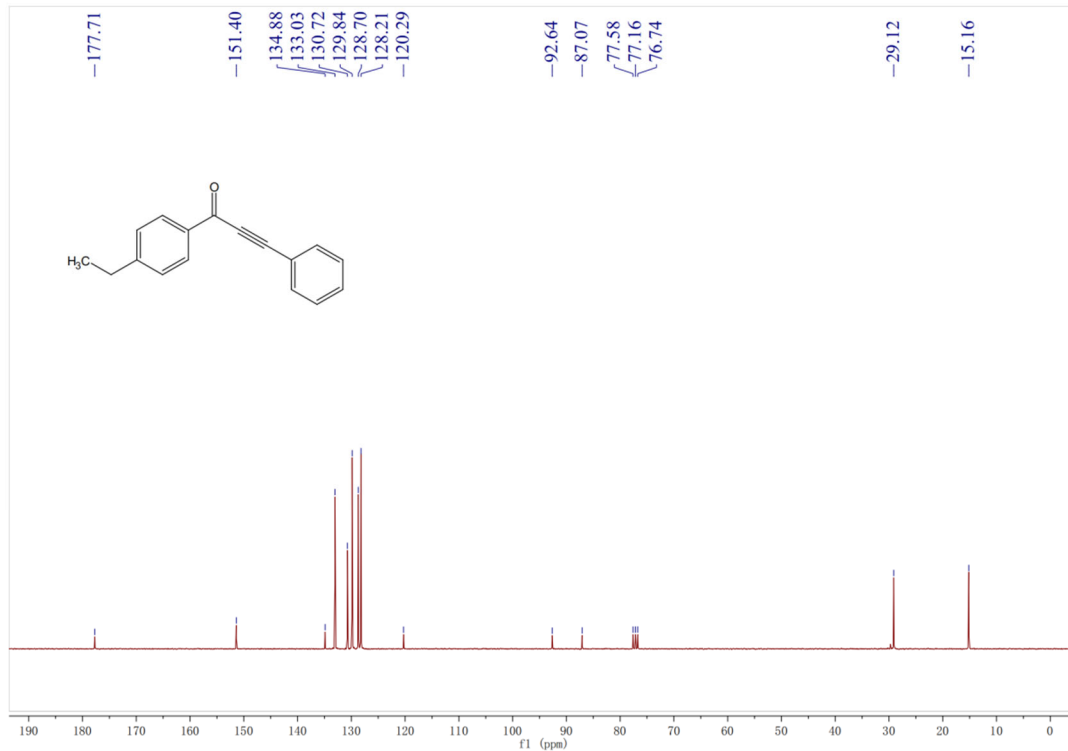

**1-(4-Methoxyphenyl)-3-phenylprop-2-yn-1-one (3ia) <sup>1</sup>H NMR (300 MHz, CDCl<sub>3</sub>)**

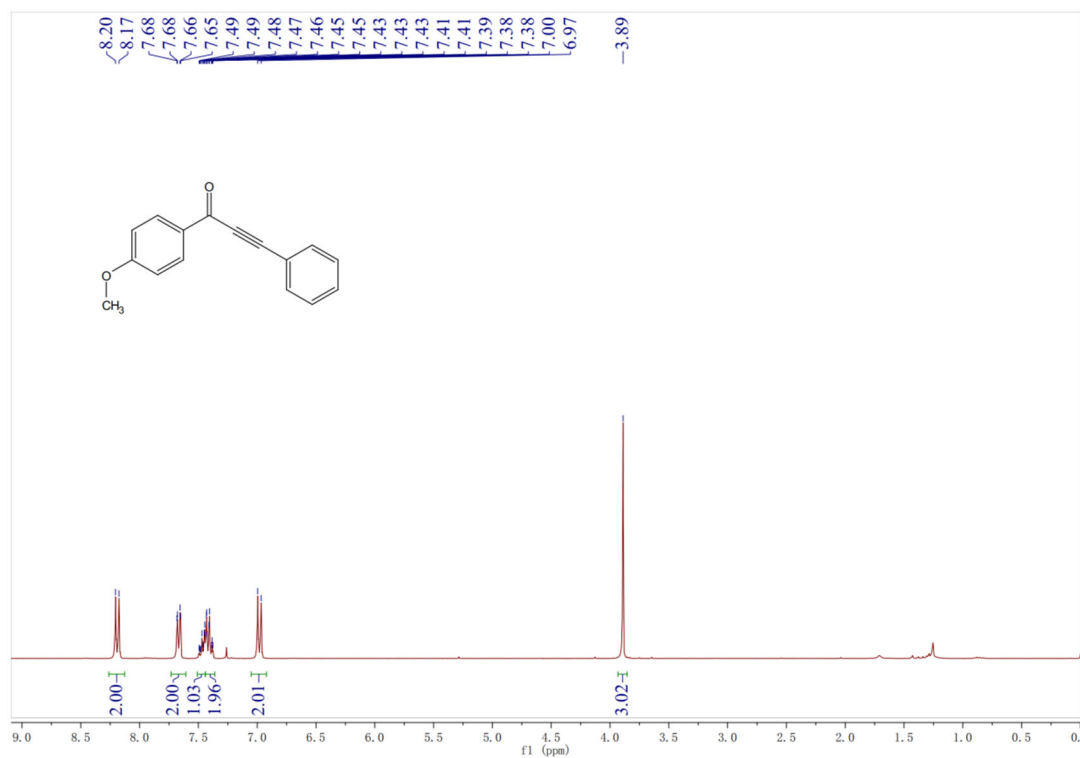

**1-(4-Methoxyphenyl)-3-phenylprop-2-yn-1-one (3ia) <sup>13</sup>C NMR (75 MHz, CDCl<sub>3</sub>)**

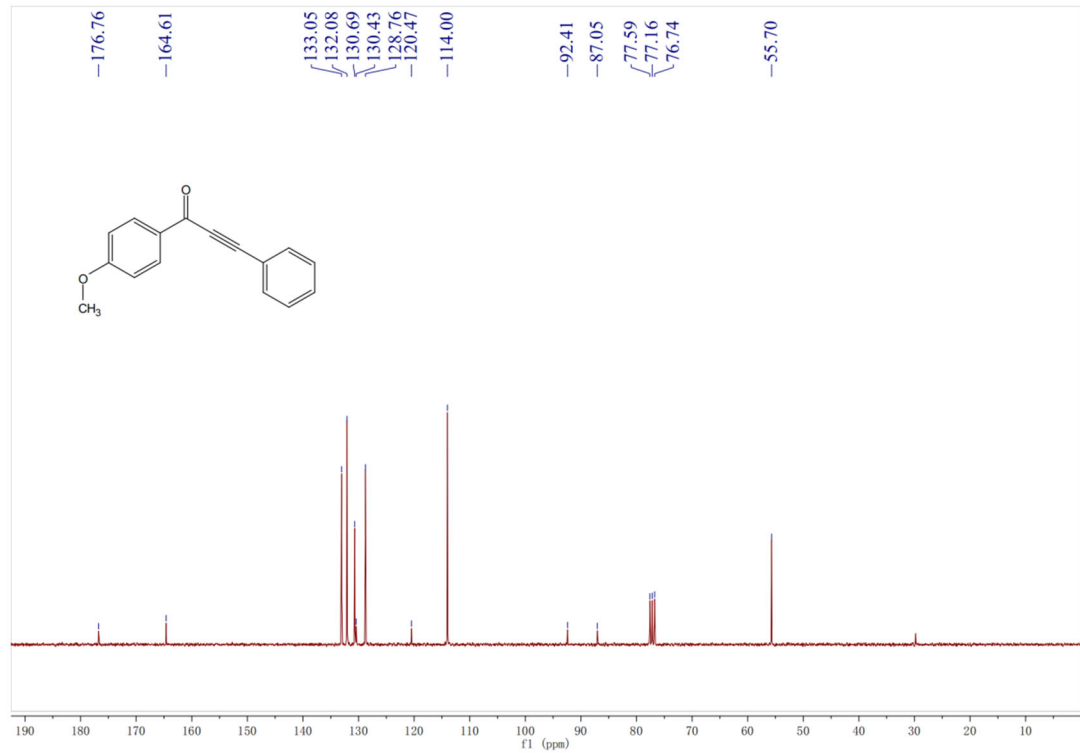

**3-Phenyl-1-[4-(trifluoromethoxy)phenyl]-2-propyn-1-one (3ja) <sup>1</sup>H NMR (300 MHz, CDCl<sub>3</sub>)**

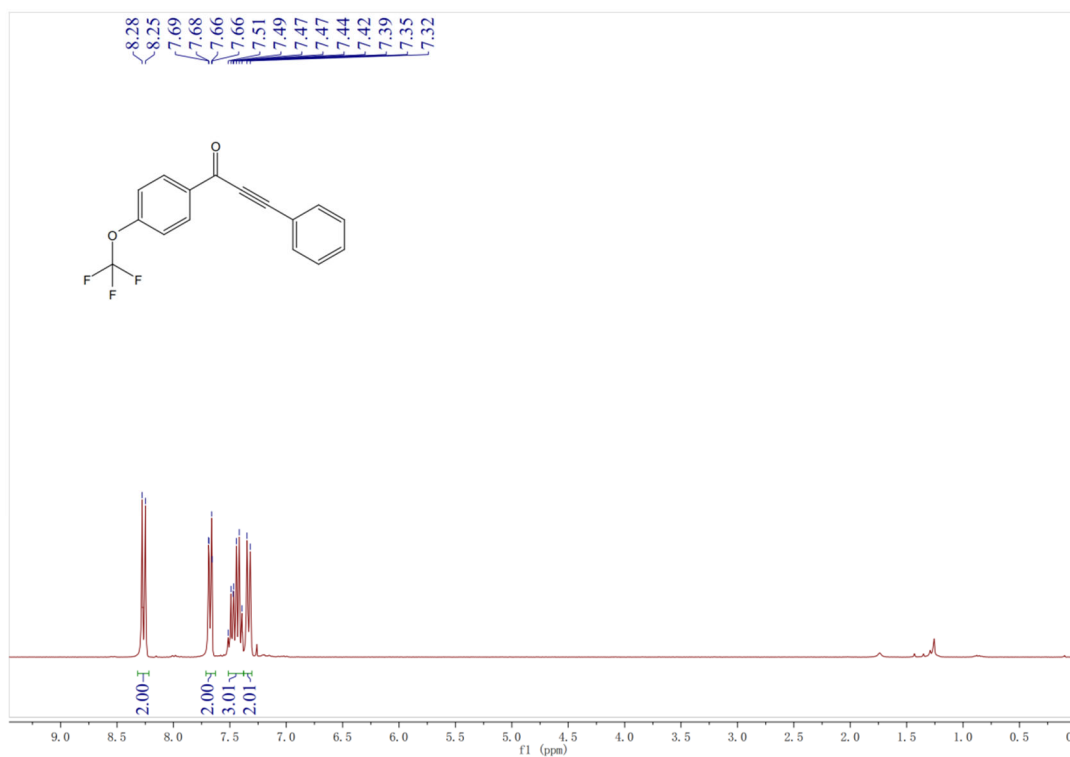

**3-Phenyl-1-[4-(trifluoromethoxy)phenyl]-2-propyn-1-one (3ja) <sup>13</sup>C NMR (75 MHz, CDCl<sub>3</sub>)**

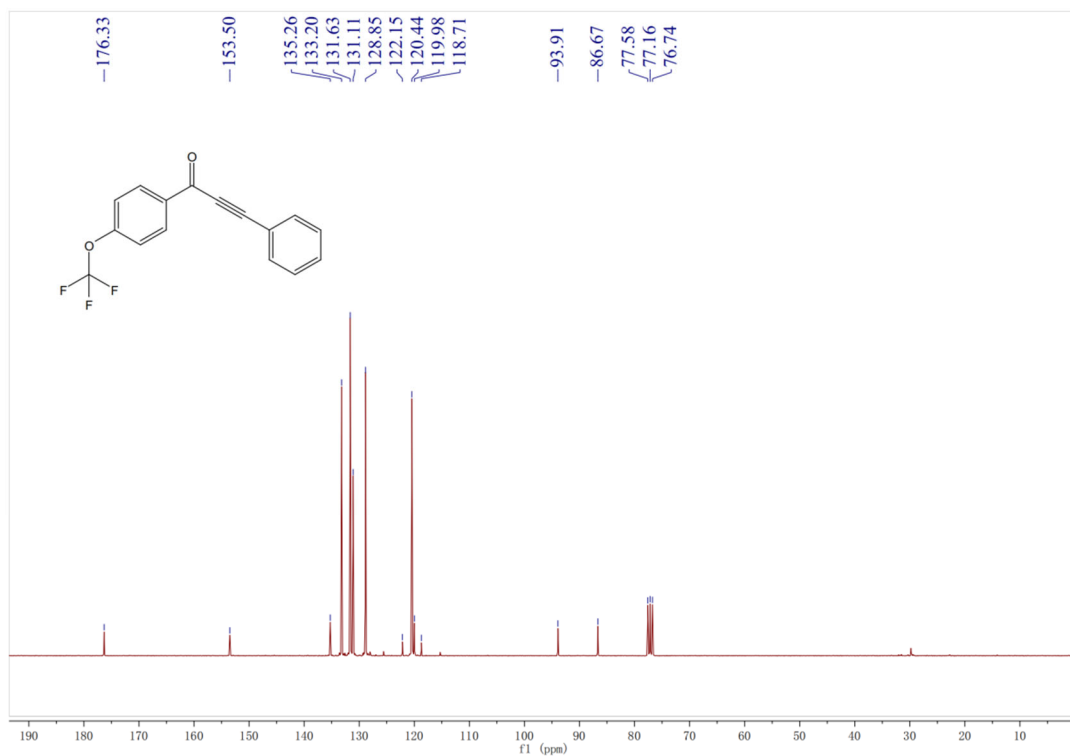

**3-Phenyl-1-[4-(trifluoromethoxy)phenyl]-2-propyn-1-one (3ja)  $^{19}\text{F}$  NMR (376 MHz,  $\text{CDCl}_3$ )**

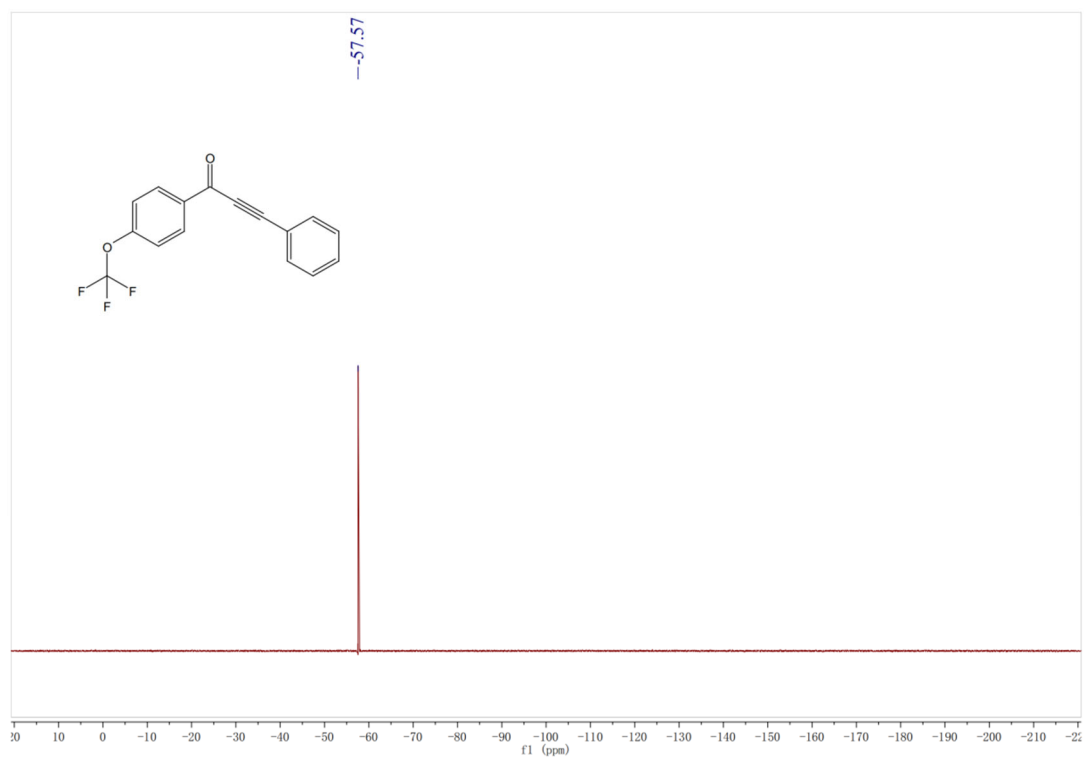

**1-([1,1'-Biphenyl]-2-yl)-3-phenylprop-2-yn-1-one (3ka) <sup>1</sup>H NMR (300 MHz, CDCl<sub>3</sub>)**

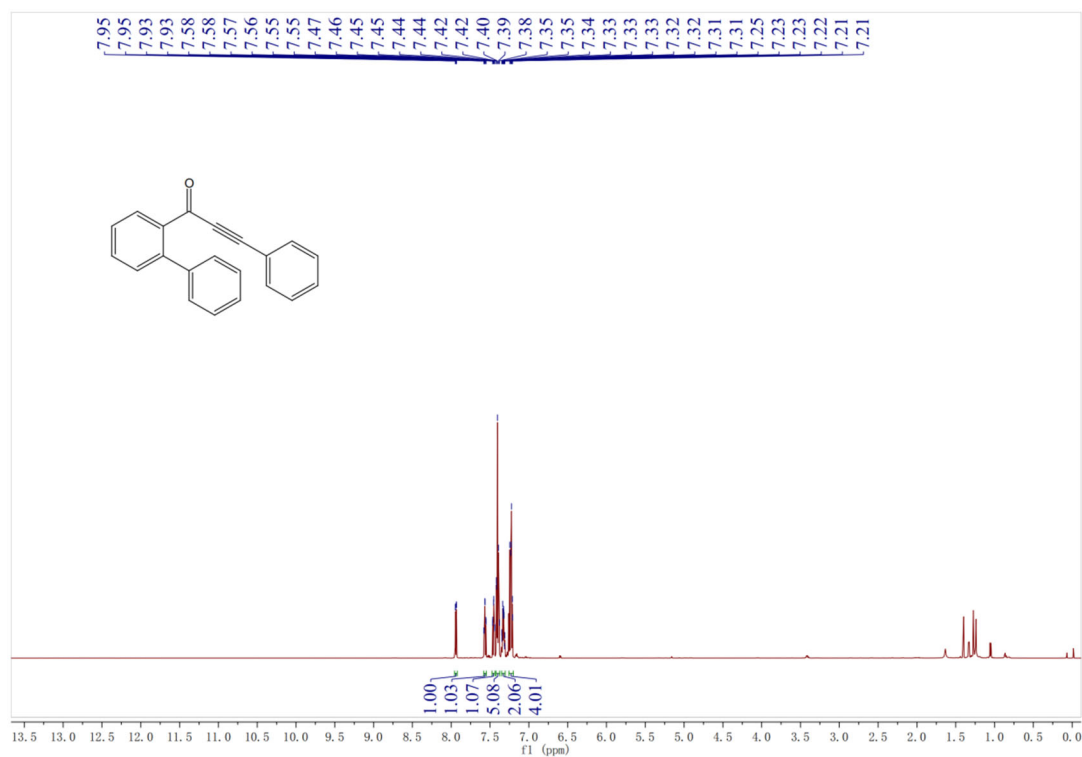

**1-([1,1'-Biphenyl]-2-yl)-3-phenylprop-2-yn-1-one (3ka) <sup>13</sup>C NMR (75 MHz, CDCl<sub>3</sub>)**

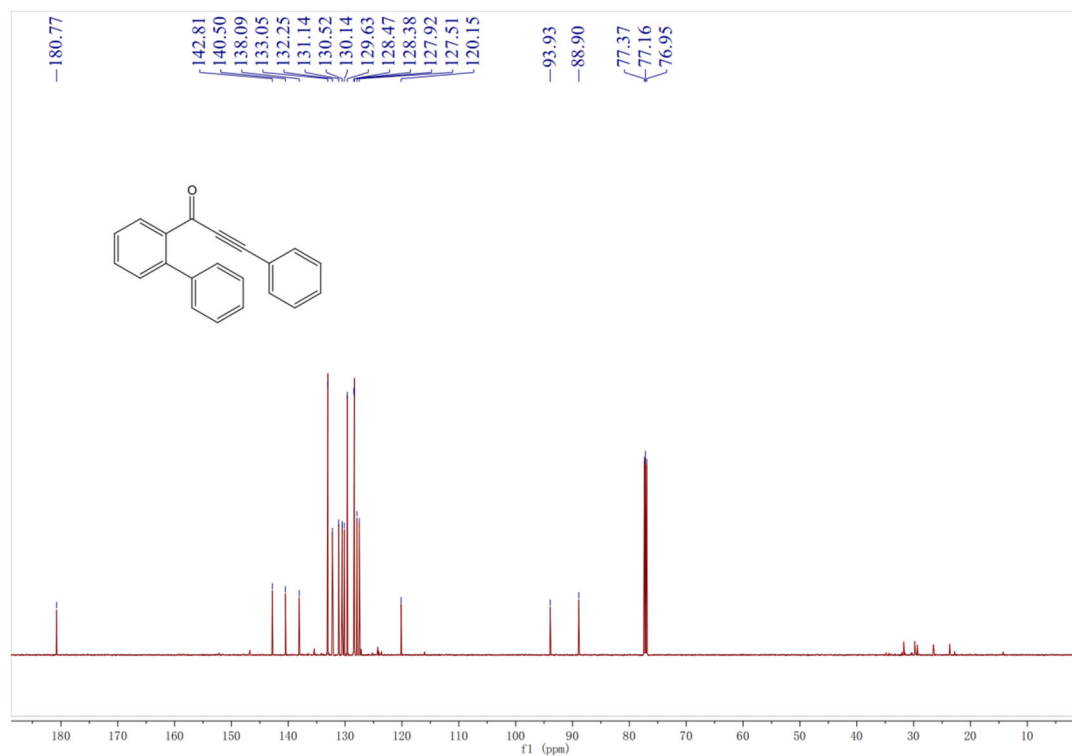

**1-([1,1'-Biphenyl]-4-yl)-3-phenylprop-2-yn-1-one (3la) <sup>1</sup>H NMR (300 MHz, CDCl<sub>3</sub>)**

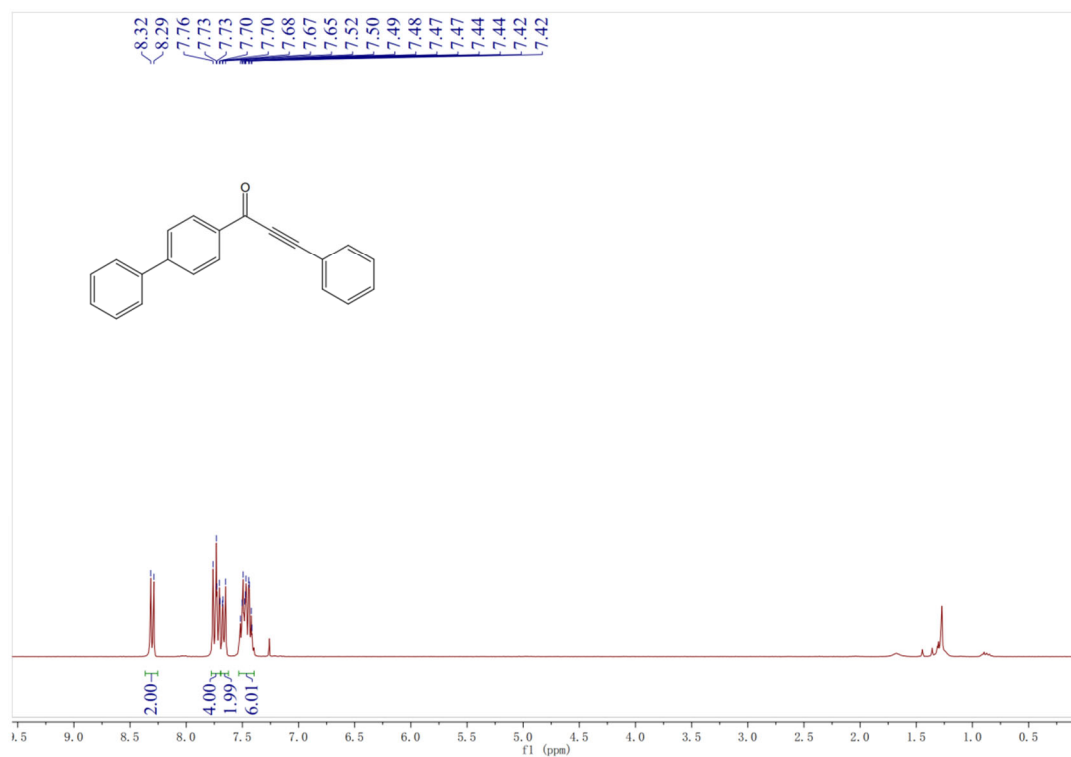

**1-([1,1'-Biphenyl]-4-yl)-3-phenylprop-2-yn-1-one (3la) <sup>13</sup>C NMR (75 MHz, CDCl<sub>3</sub>)**

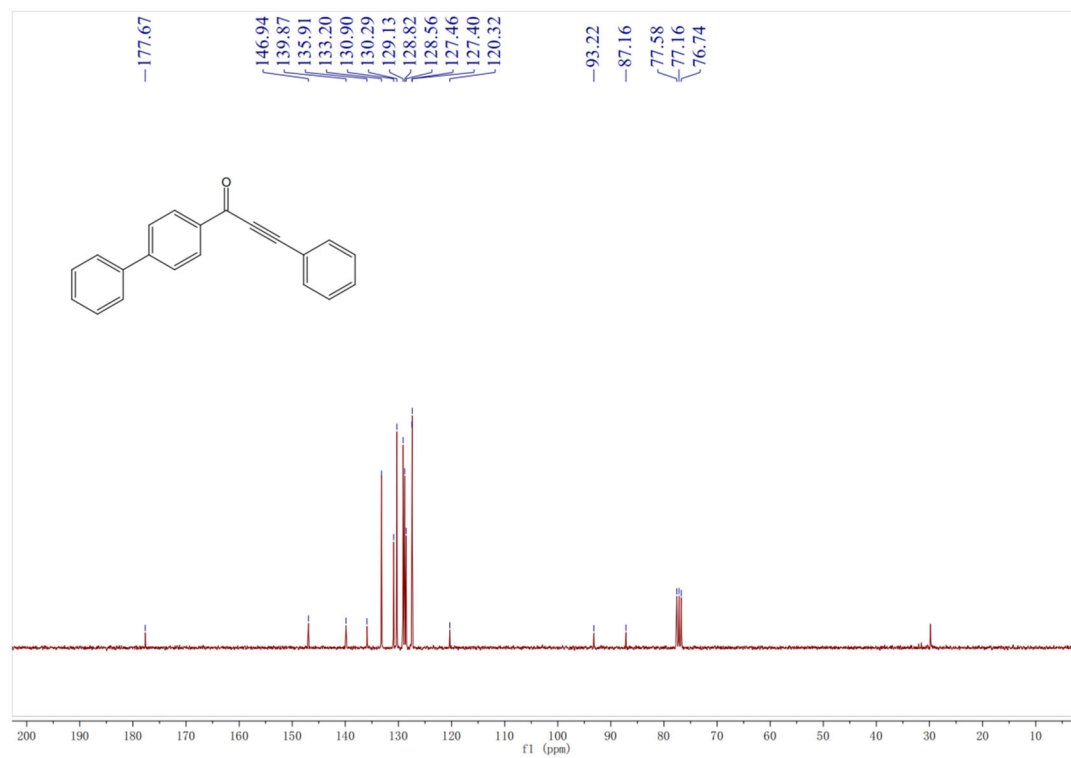

**3-Phenyl-1-[2-(trifluoromethyl)phenyl]-2-propyn-1-one (3ma) <sup>1</sup>H NMR (300 MHz, CDCl<sub>3</sub>)**

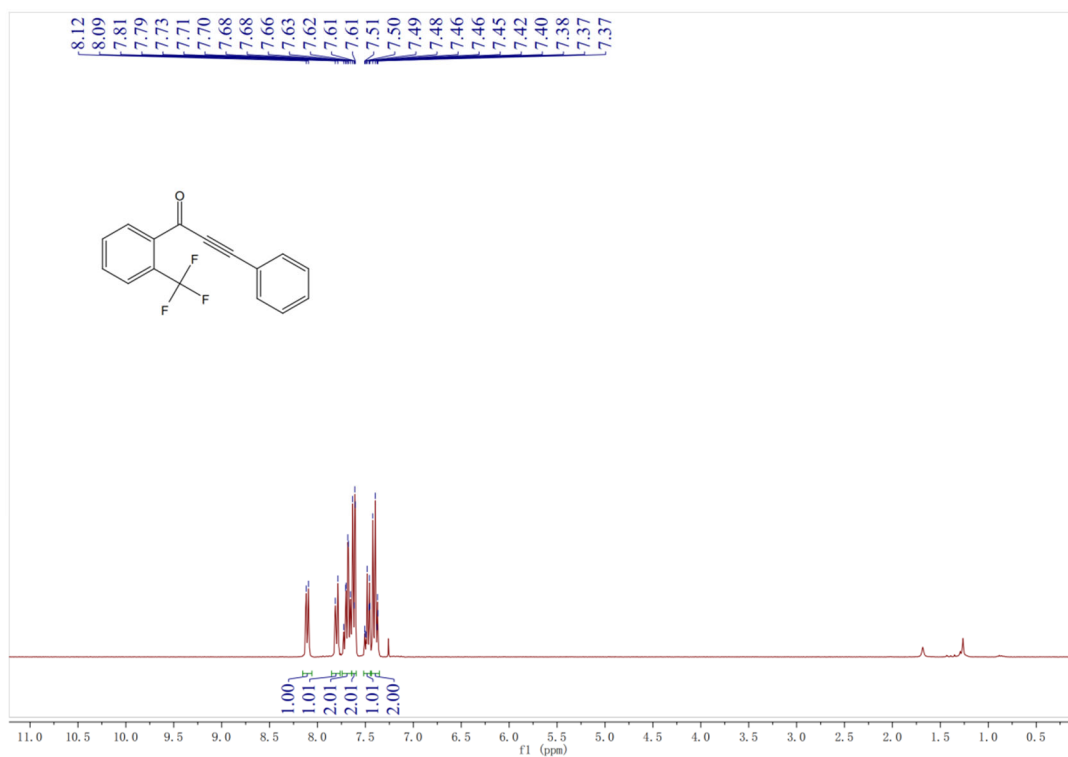

**3-Phenyl-1-[2-(trifluoromethyl)phenyl]-2-propyn-1-one (3ma) <sup>13</sup>C NMR (75 MHz, CDCl<sub>3</sub>)**

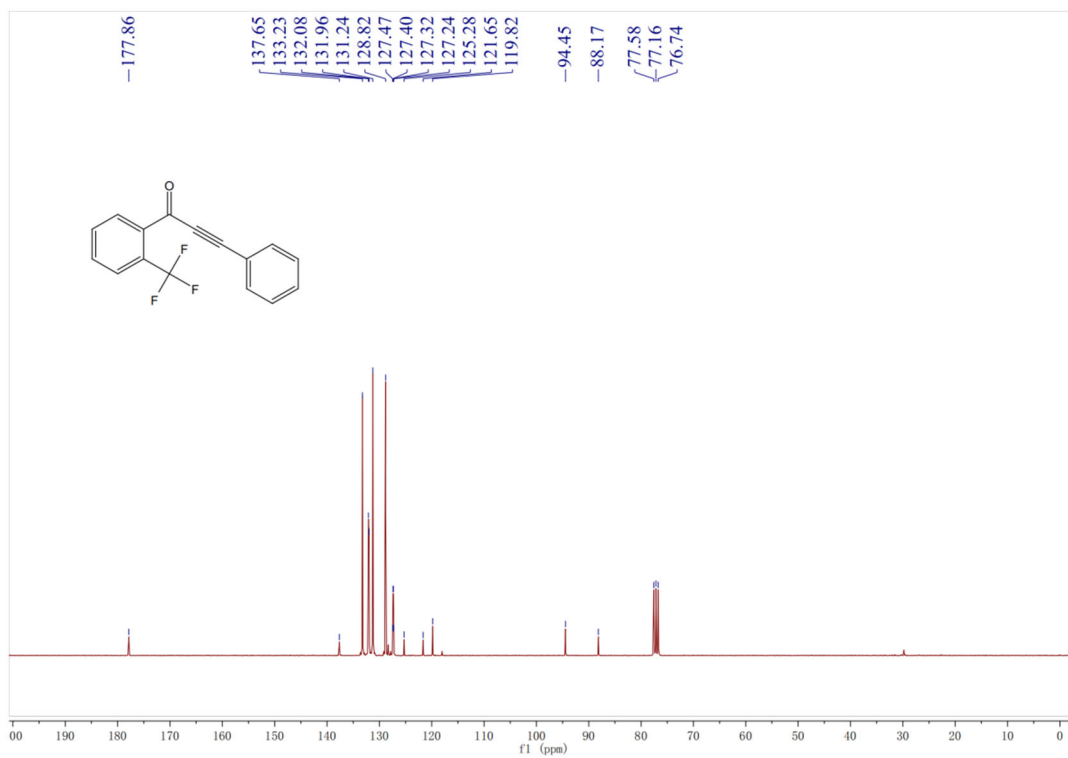



**3-Phenyl-1-[2-(trifluoromethyl)phenyl]-2-propyn-1-one (3ma) <sup>19</sup>F NMR (376 MHz, CDCl<sub>3</sub>)**

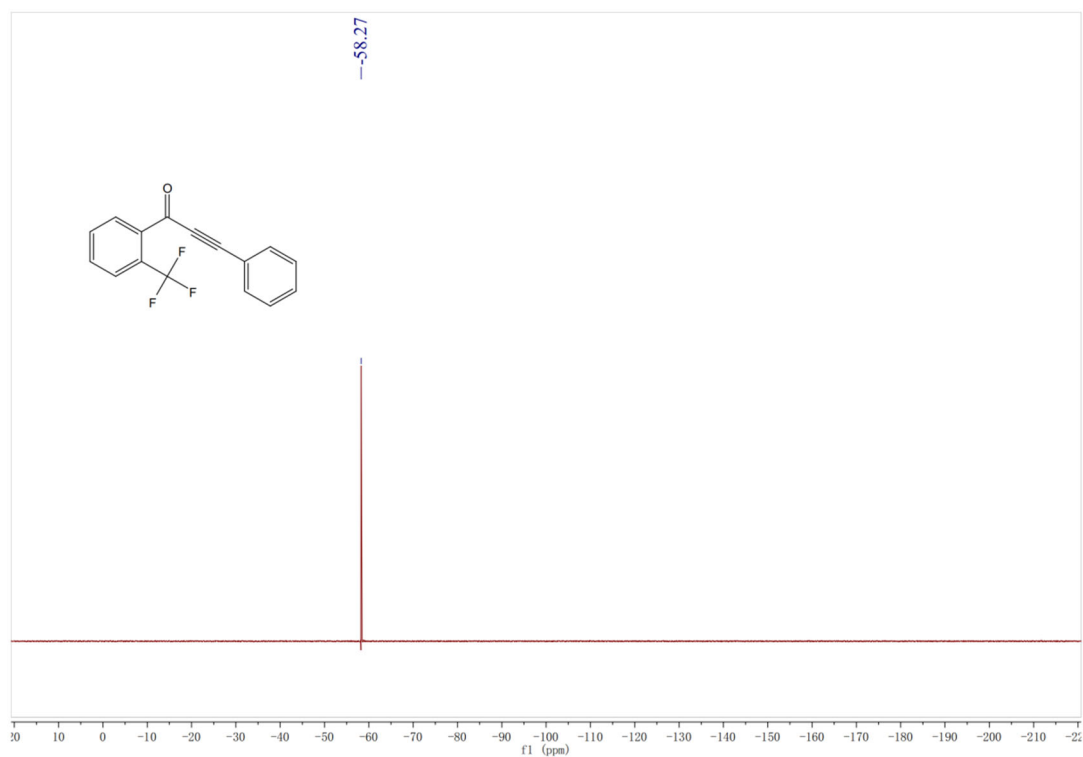

**3-Phenyl-1-(4-(trifluoromethyl)phenyl)prop-2-yn-1-one (3na) <sup>1</sup>H NMR (300 MHz, CDCl<sub>3</sub>)**

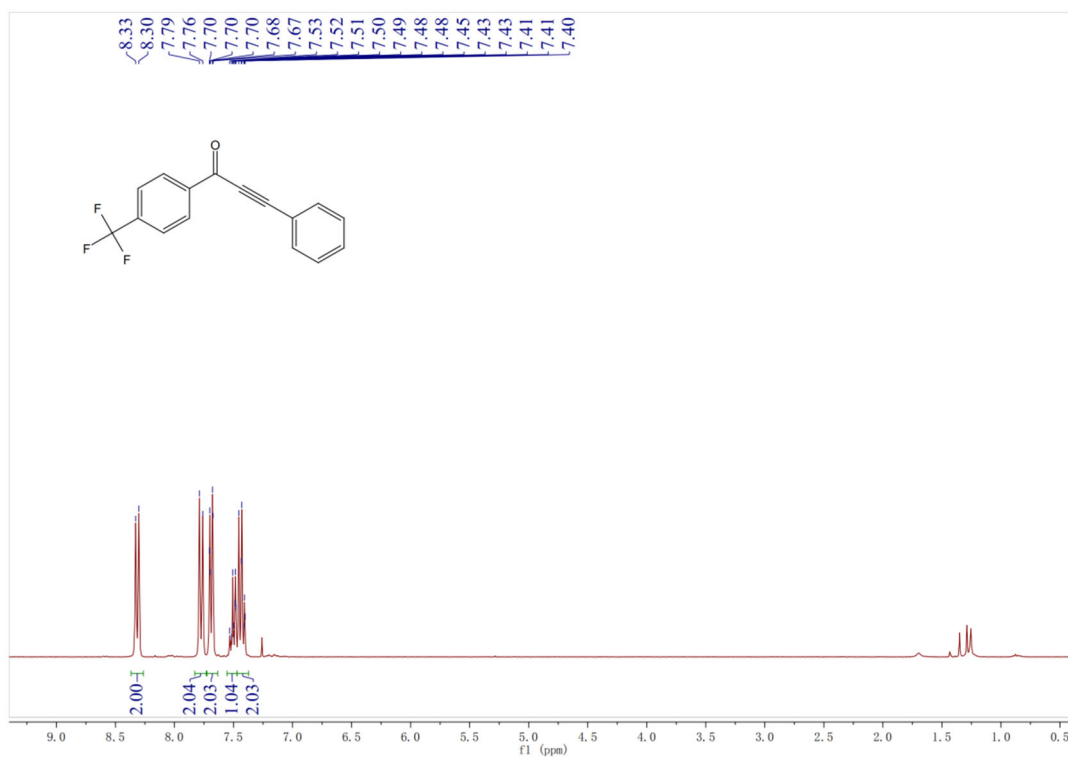

**3-Phenyl-1-(4-(trifluoromethyl)phenyl)prop-2-yn-1-one (3na) <sup>13</sup>C NMR (75 MHz, CDCl<sub>3</sub>)**

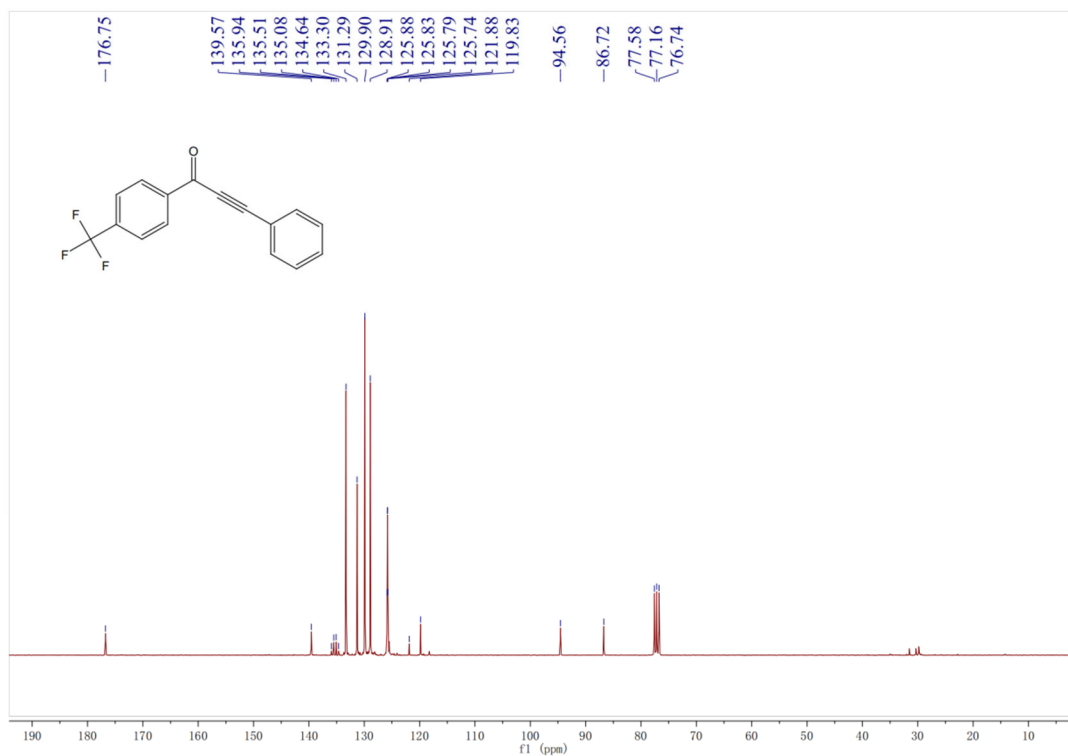

**1-(4-Nitrophenyl)-3-phenylprop-2-yn-1-one (30a) <sup>1</sup>H NMR (300 MHz, CDCl<sub>3</sub>)**

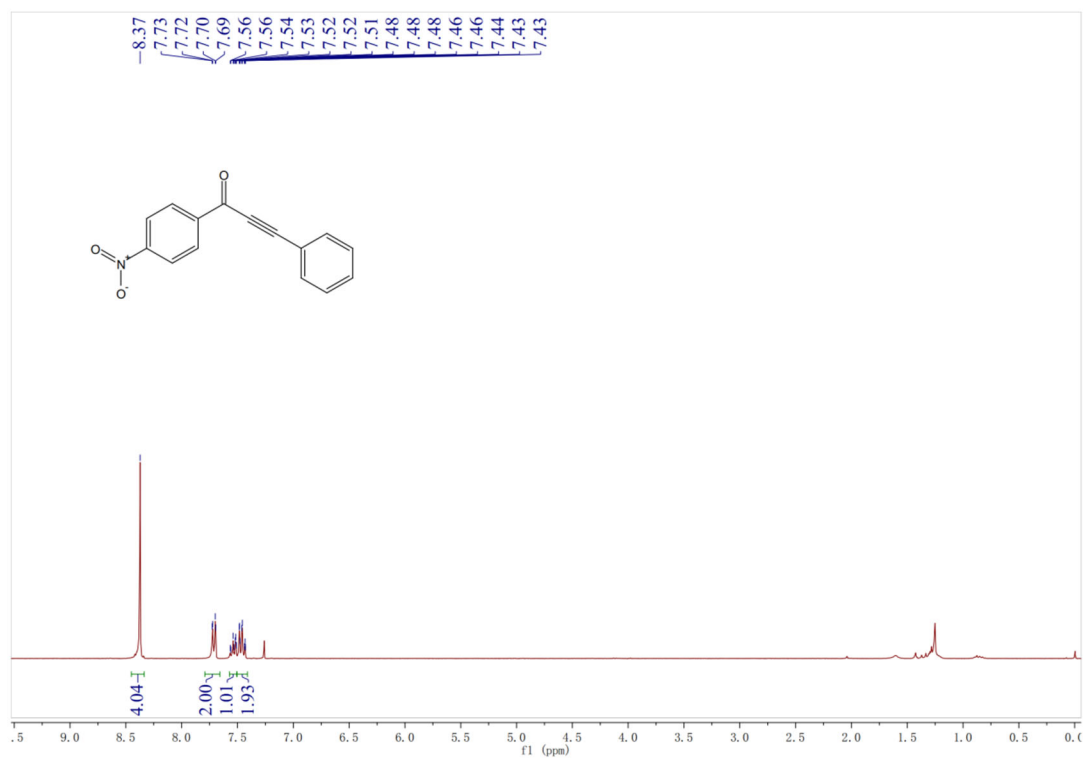

**1-(4-Nitrophenyl)-3-phenylprop-2-yn-1-one (30a) <sup>13</sup>C NMR (75 MHz, CDCl<sub>3</sub>)**

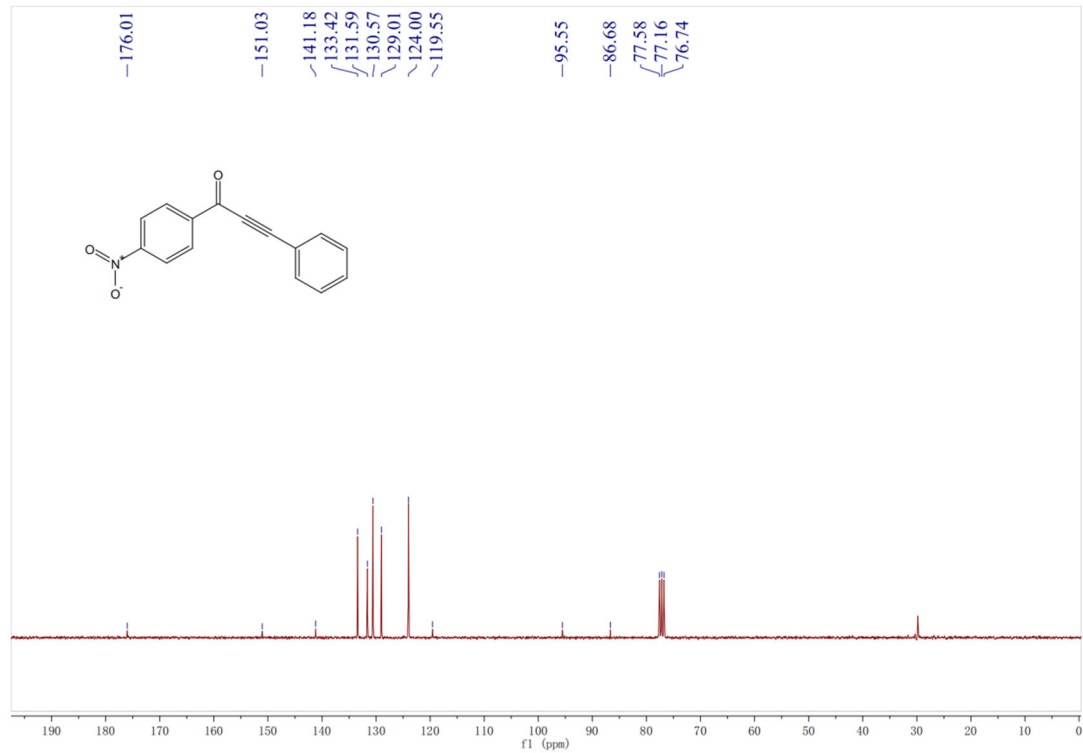

**1-(4-Fluorophenyl)-3-phenylprop-2-yn-1-one (3pa)  $^1\text{H}$  NMR (300 MHz,  $\text{CDCl}_3$ )**

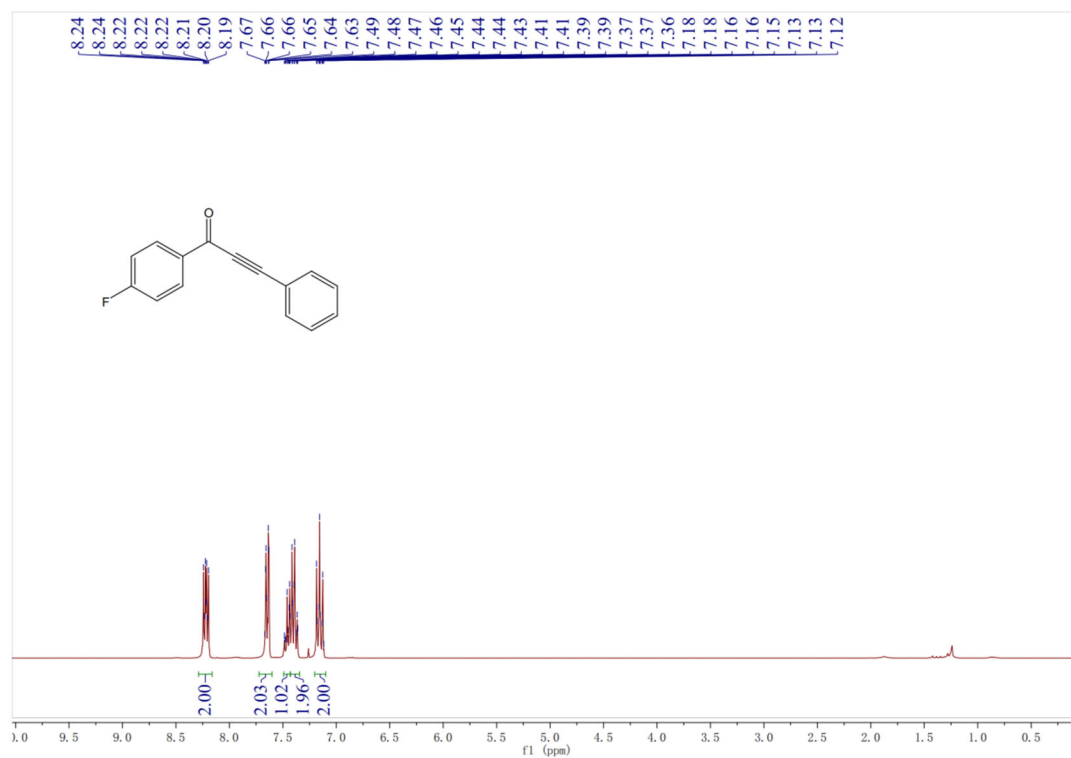

**1-(4-Fluorophenyl)-3-phenylprop-2-yn-1-one (3pa)  $^{13}\text{C}$  NMR (75 MHz,  $\text{CDCl}_3$ )**

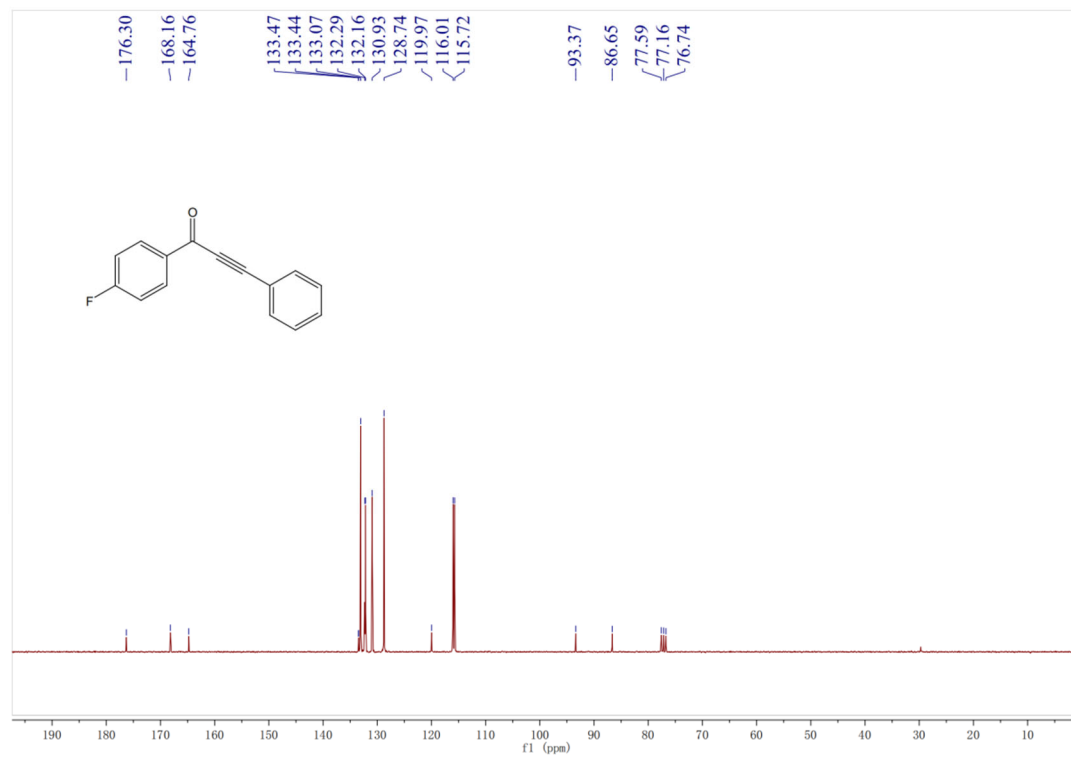

**1-(Naphthalen-2-yl)-3-phenylprop-2-yn-1-one (3qa) <sup>1</sup>H NMR (300 MHz, CDCl<sub>3</sub>)**

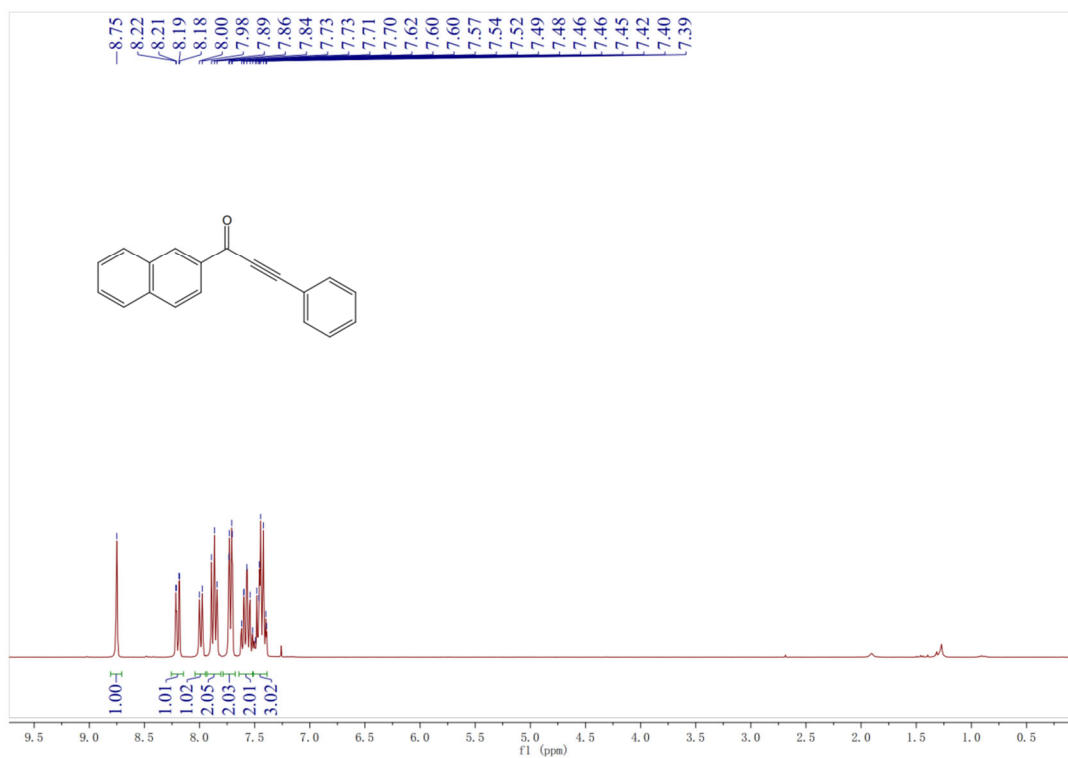

**1-(Naphthalen-2-yl)-3-phenylprop-2-yn-1-one (3qa) <sup>13</sup>C NMR (75 MHz, CDCl<sub>3</sub>)**

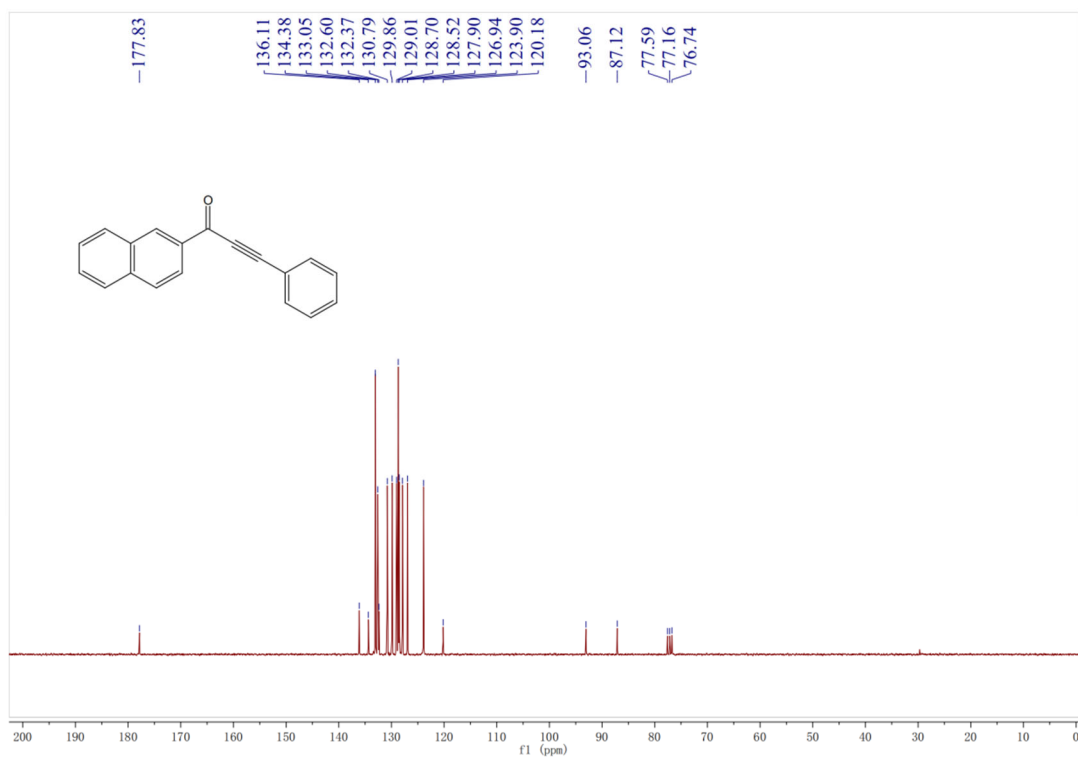

**1-(Naphthalen-1-yl)-3-phenylprop-2-yn-1-one (3ra) <sup>1</sup>H NMR (300 MHz, CDCl<sub>3</sub>)**

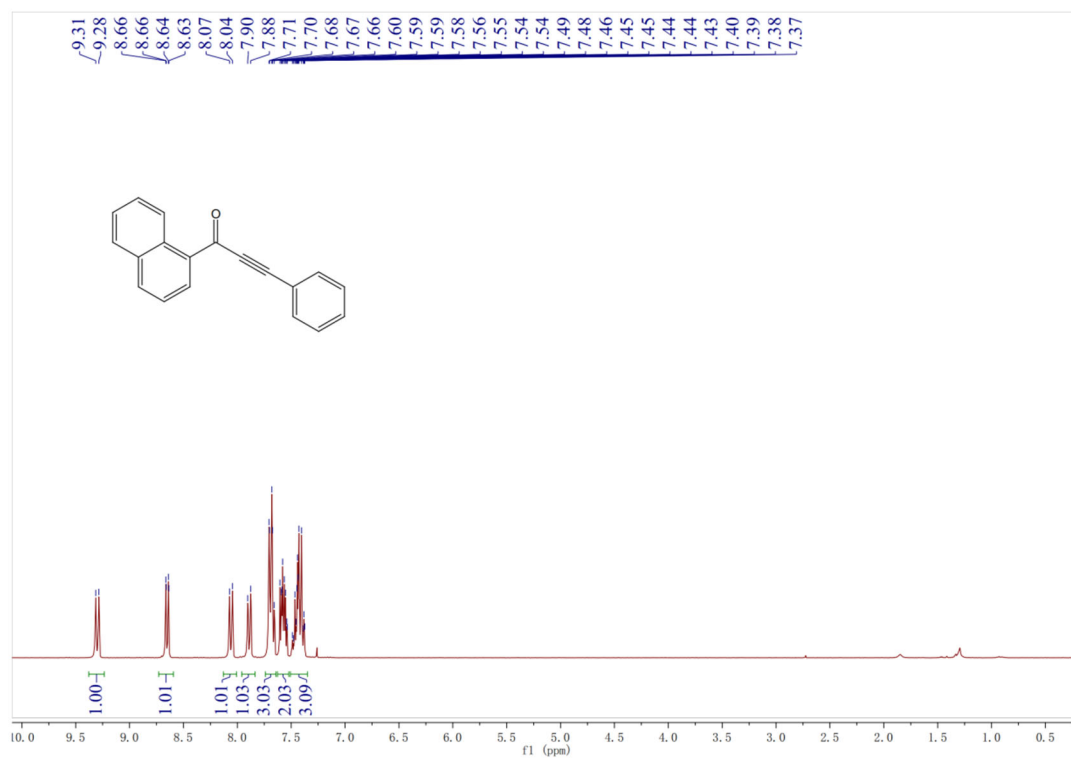

**1-(Naphthalen-1-yl)-3-phenylprop-2-yn-1-one (3ra) <sup>13</sup>C NMR (75 MHz, CDCl<sub>3</sub>)**

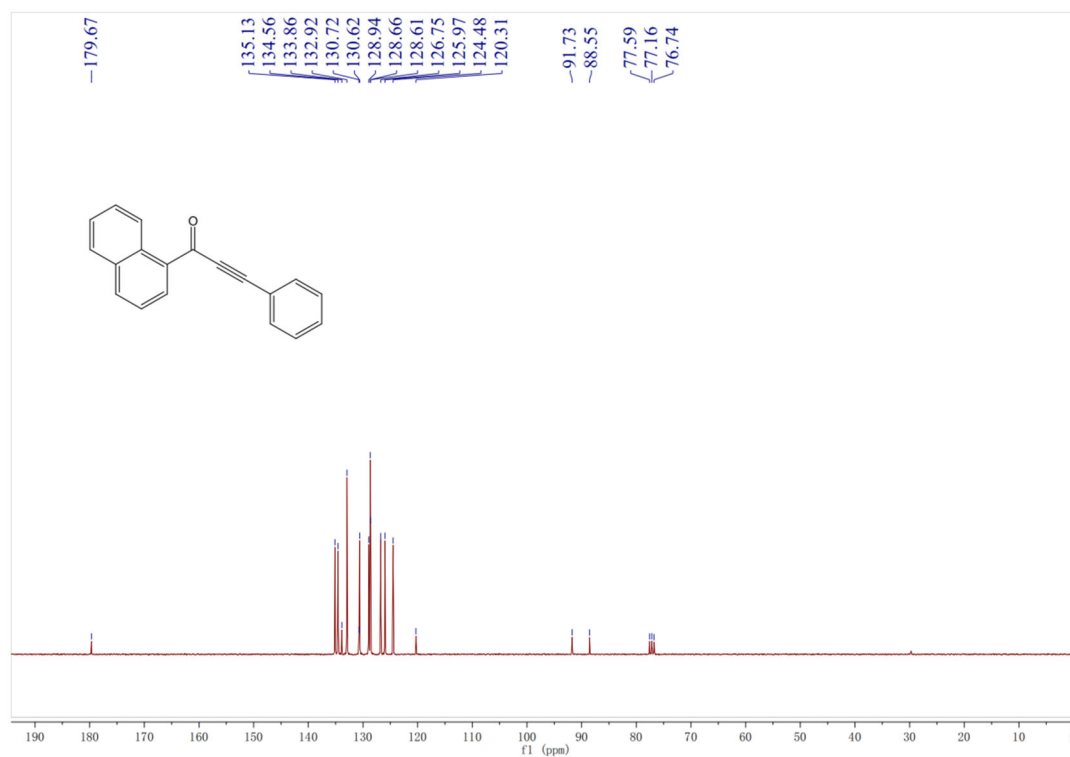

**1-(Furan-2-yl)-3-phenylprop-2-yn-1-one (3sa) <sup>1</sup>H NMR (300 MHz, CDCl<sub>3</sub>)**

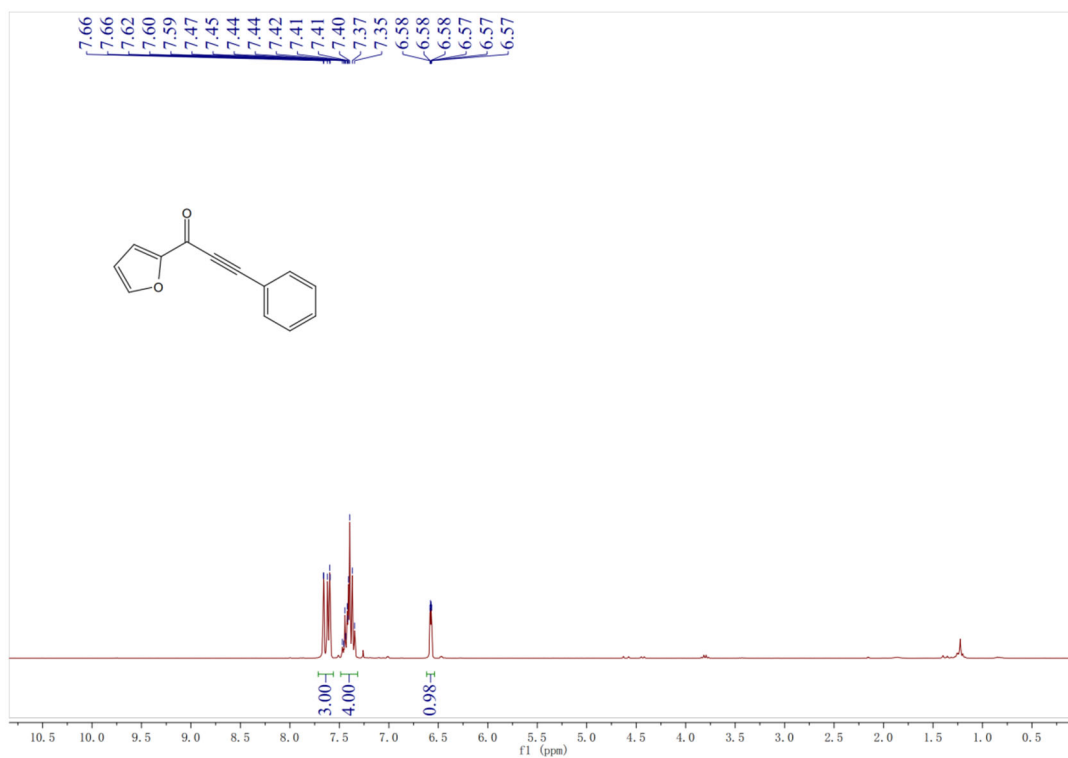

**1-(Furan-2-yl)-3-phenylprop-2-yn-1-one (3sa) <sup>13</sup>C NMR (75 MHz, CDCl<sub>3</sub>)**

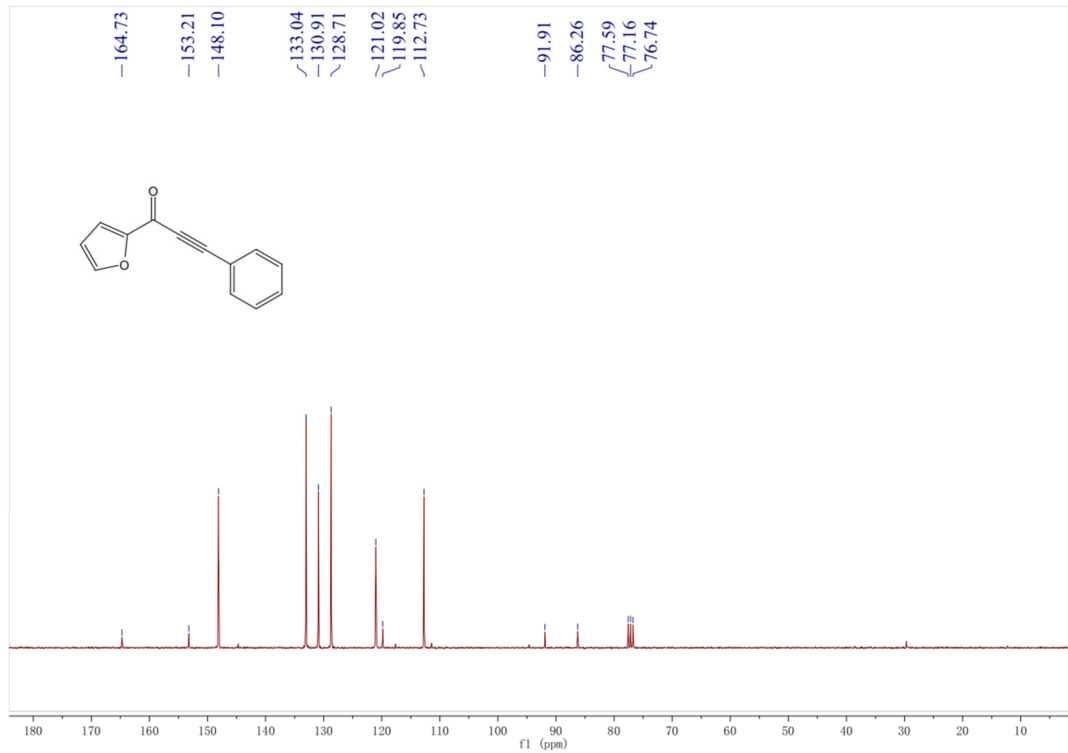

**3-Phenyl-1-(thiophen-2-yl)prop-2-yn-1-one (3ta)  $^1\text{H}$  NMR (300 MHz,  $\text{CDCl}_3$ )**

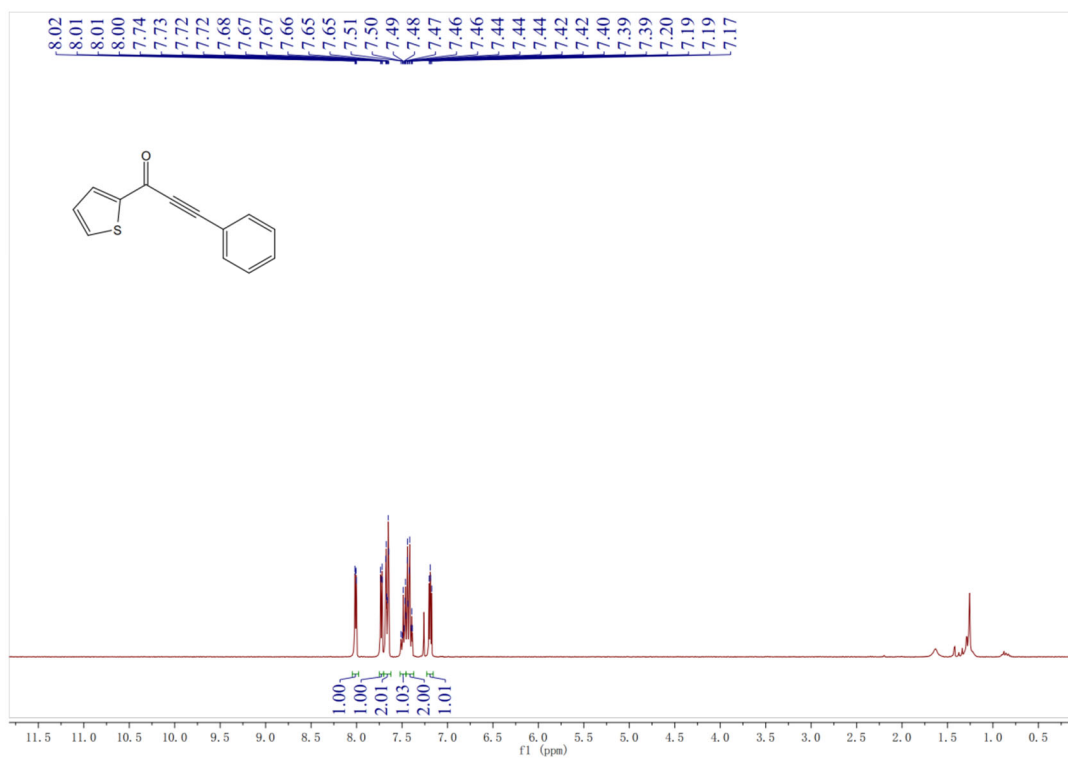

**3-Phenyl-1-(thiophen-2-yl)prop-2-yn-1-one (3ta)  $^{13}\text{C}$  NMR (75 MHz,  $\text{CDCl}_3$ )**

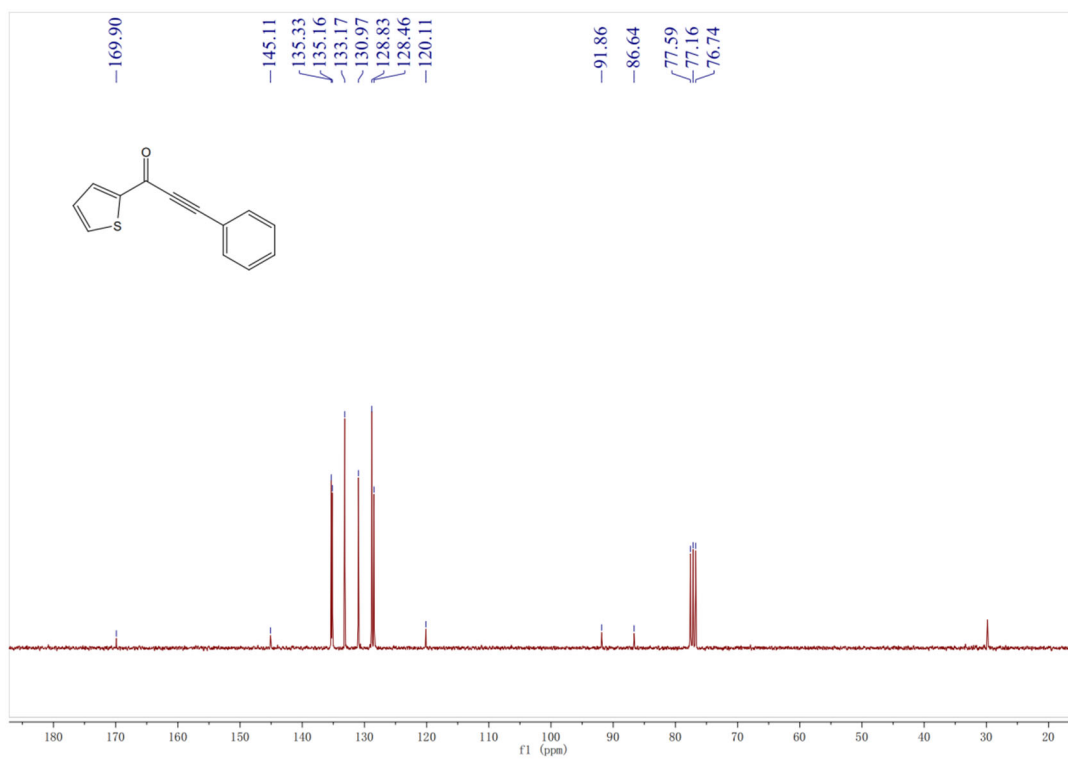



**4-Methyl-1-phenylpent-1-yn-3-one (3ua)  $^1\text{H}$  NMR (300 MHz,  $\text{CDCl}_3$ )**

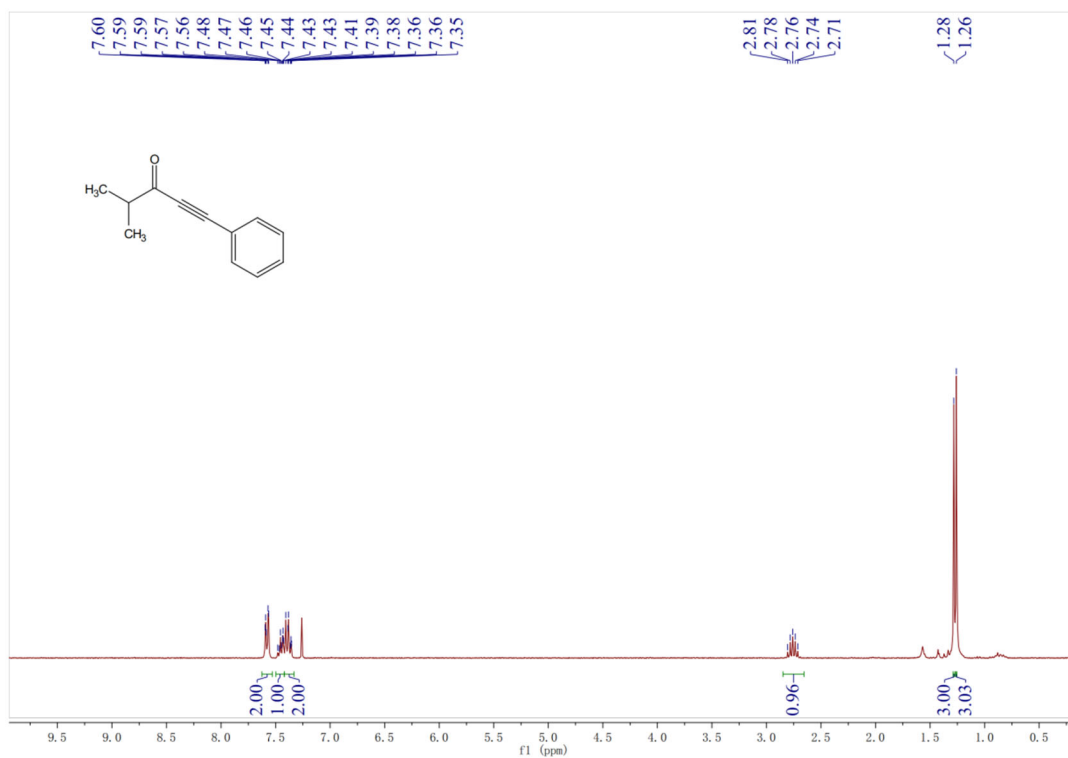

**4-Methyl-1-phenylpent-1-yn-3-one (3ua)  $^{13}\text{C}$  NMR (75 MHz,  $\text{CDCl}_3$ )**

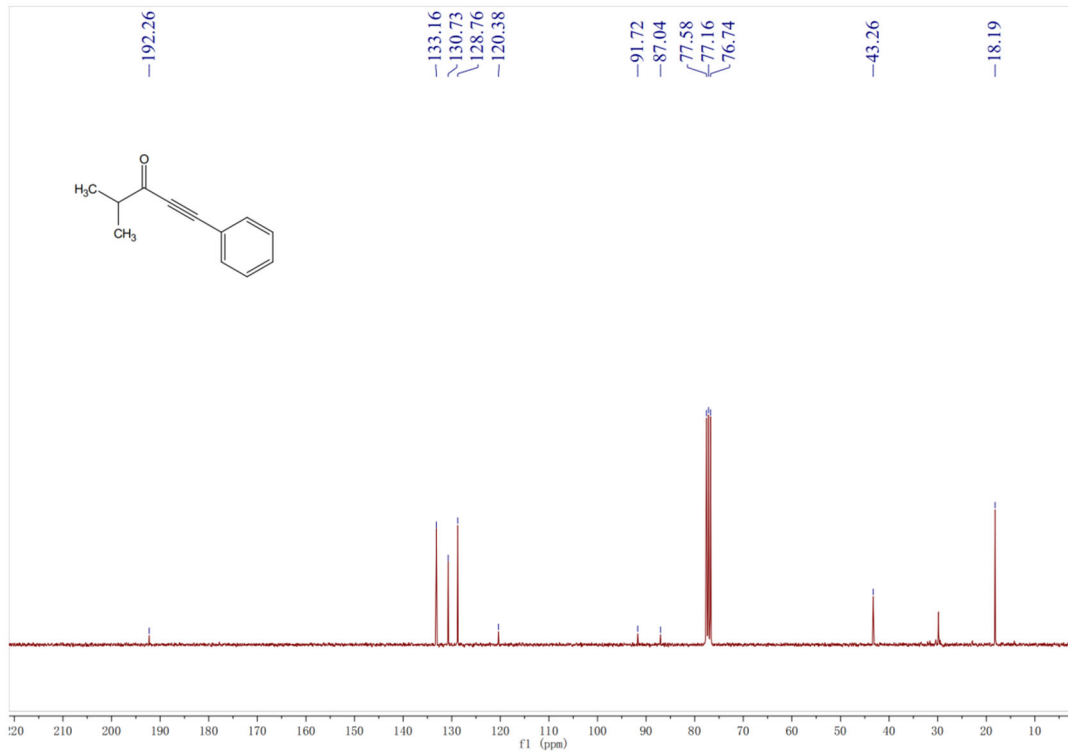

### 1-Phenylhex-1-yn-3-one (3va) <sup>1</sup>H NMR (300 MHz, CDCl<sub>3</sub>)

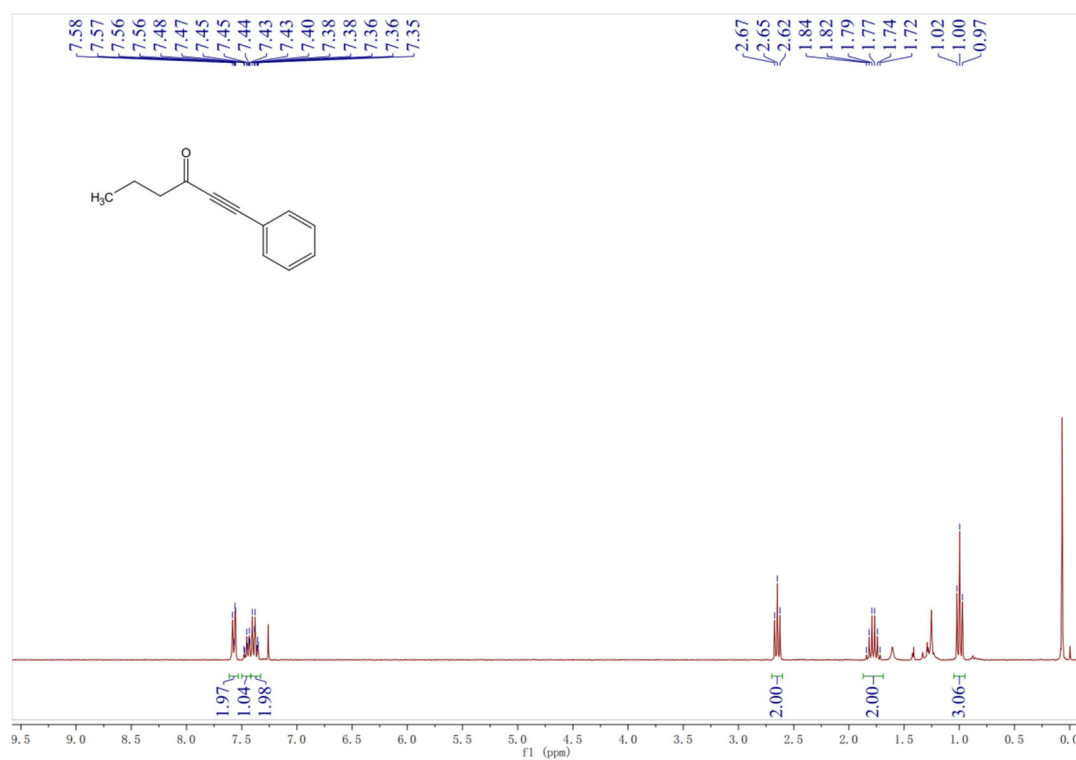

### 1-Phenylhex-1-yn-3-one (3va) <sup>13</sup>C NMR (75 MHz, CDCl<sub>3</sub>)

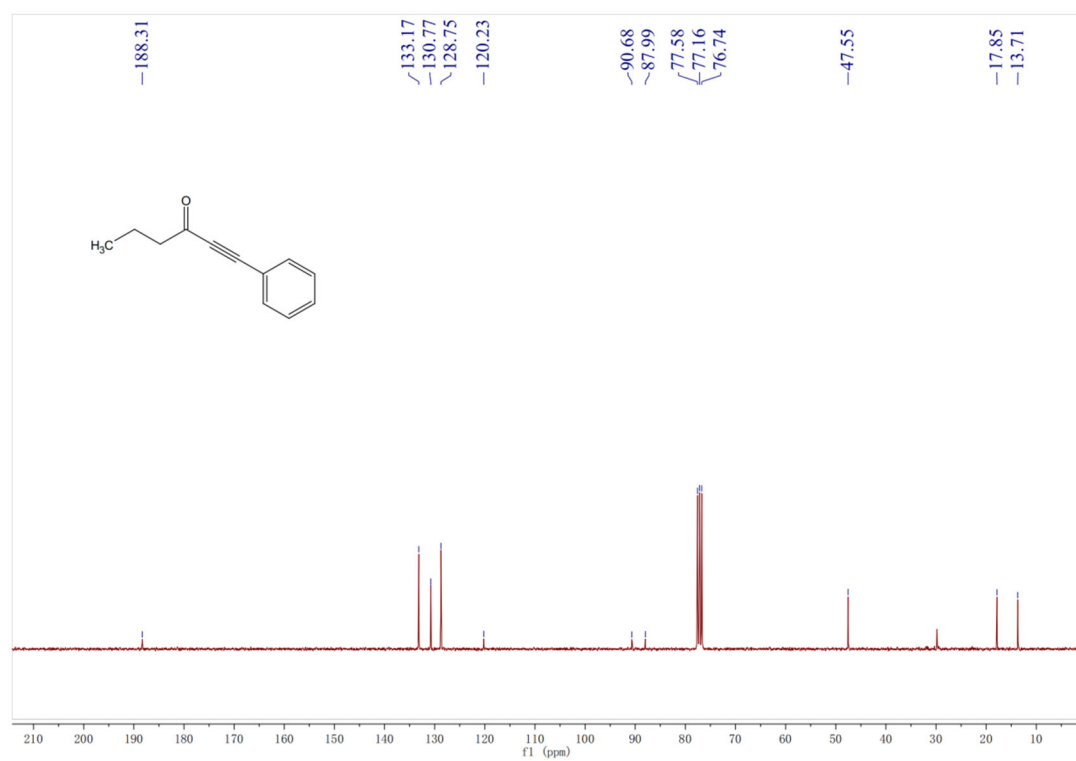

**5-Methyl-1-phenylhex-1-yn-3-one (3wa) <sup>1</sup>H NMR (300 MHz, CDCl<sub>3</sub>)**

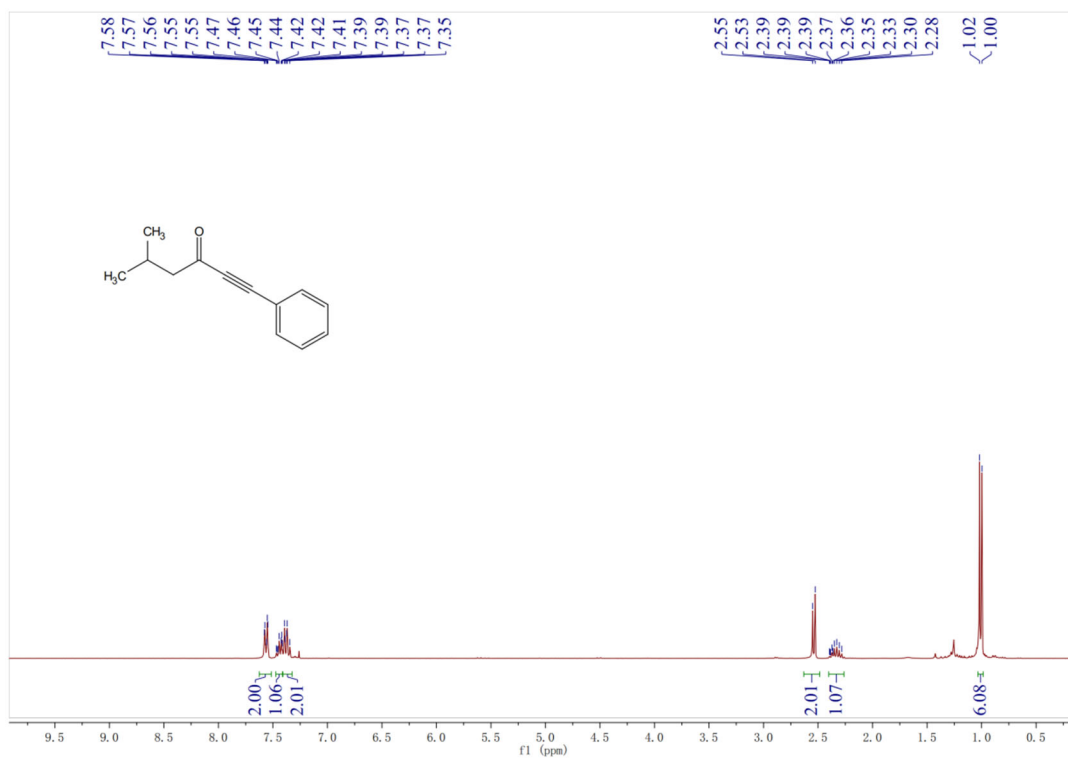

**5-Methyl-1-phenylhex-1-yn-3-one (3wa) <sup>13</sup>C NMR (75 MHz, CDCl<sub>3</sub>)**

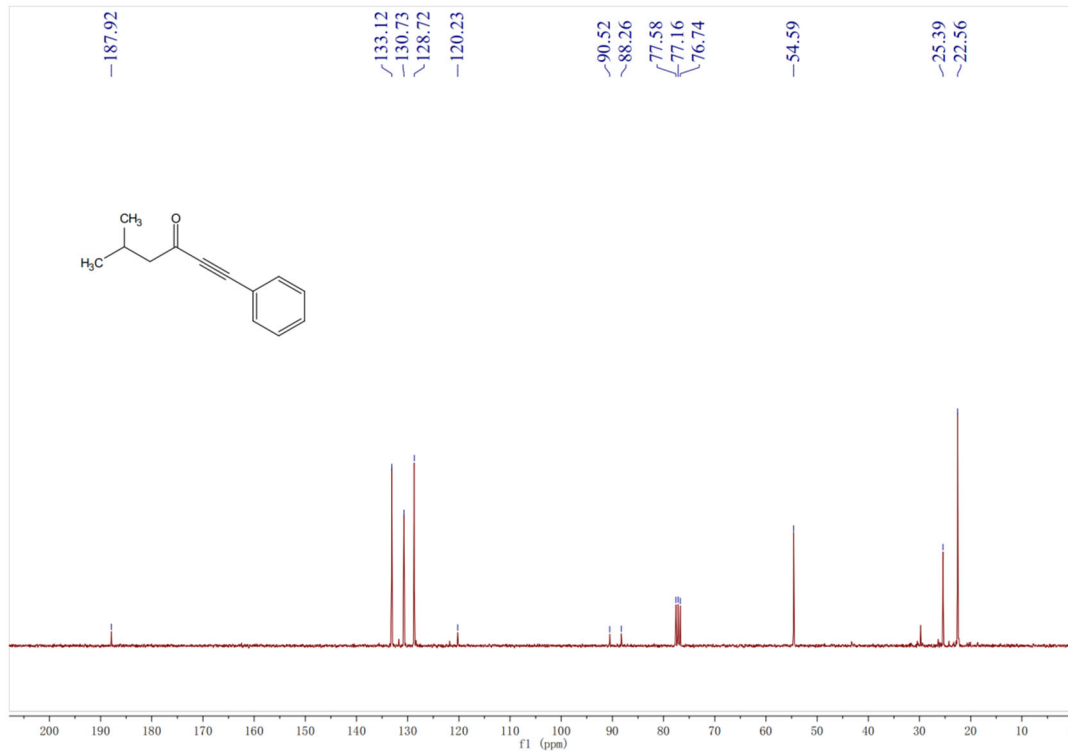

### 1-Phenyldec-1-yn-3-one (3xa) <sup>1</sup>H NMR (300 MHz, CDCl<sub>3</sub>)

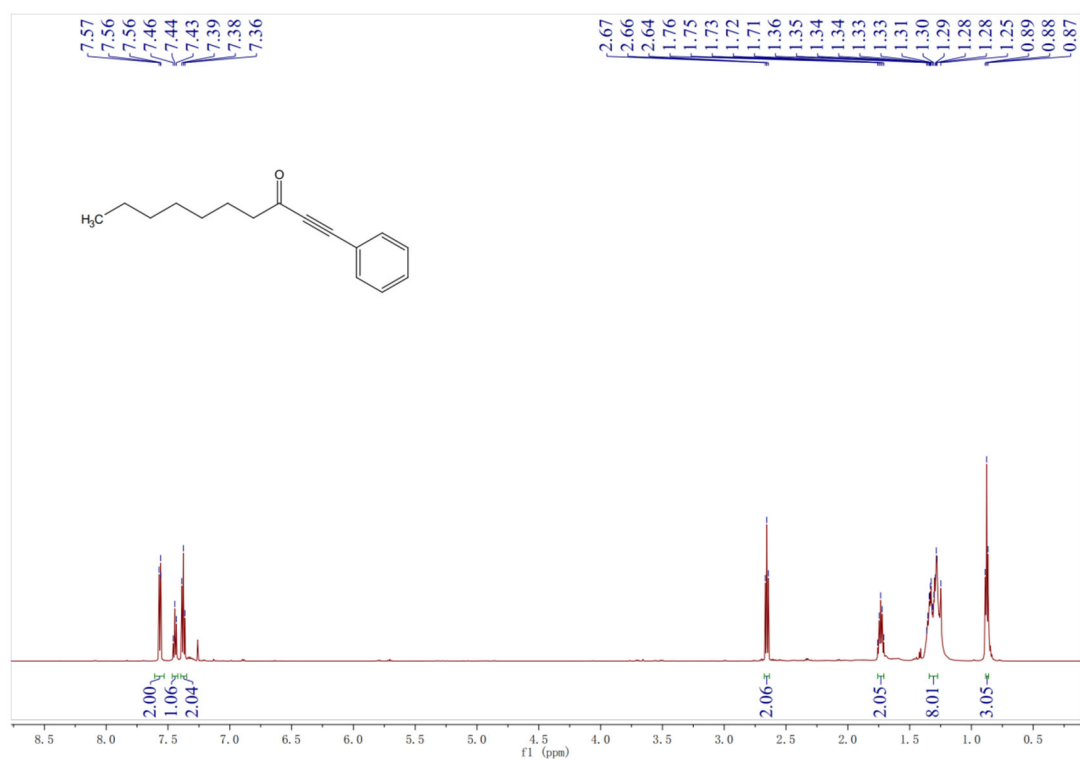

### 1-Phenyldec-1-yn-3-one (3xa) <sup>13</sup>C NMR (75 MHz, CDCl<sub>3</sub>)

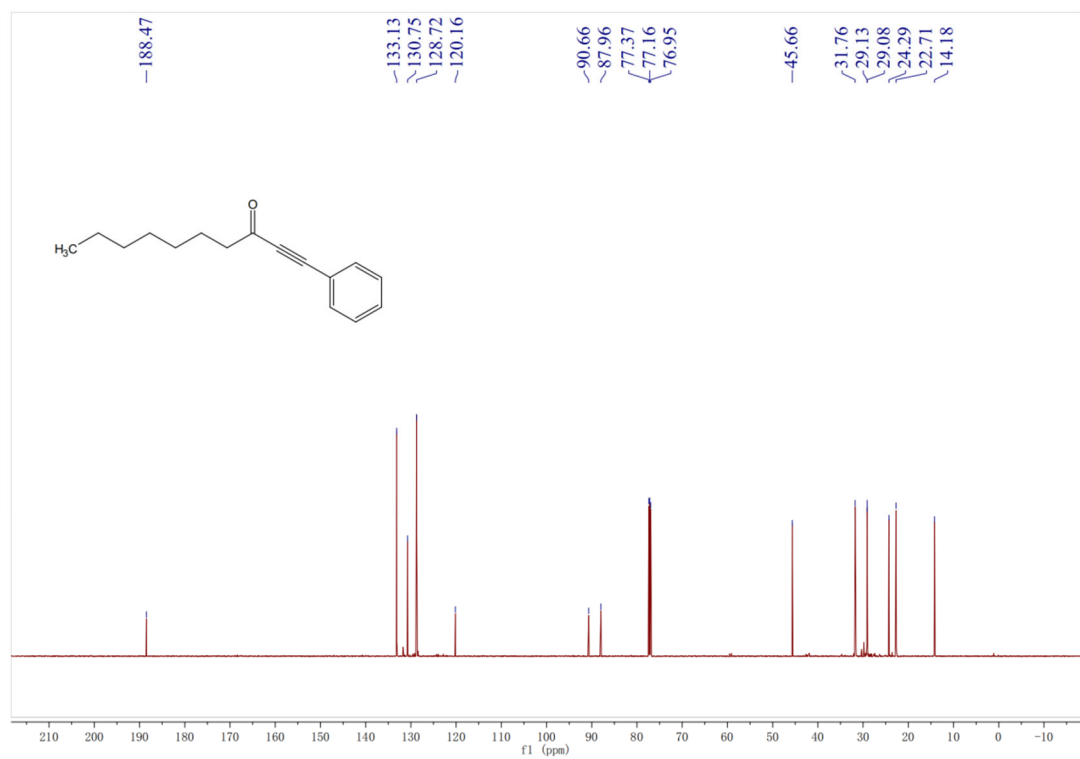

**1-Phenyloctadec-1-yn-3-one (3ya) <sup>1</sup>H NMR (300 MHz, CDCl<sub>3</sub>)**

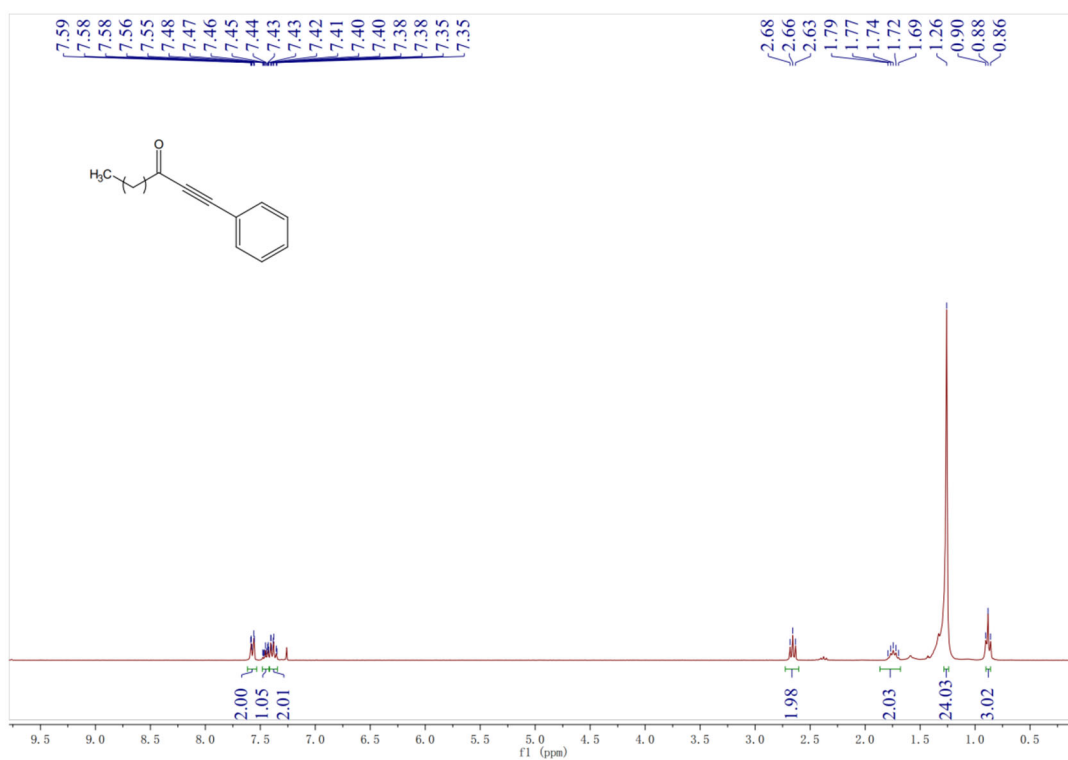

**1-Phenyloctadec-1-yn-3-one (3ya) <sup>13</sup>C NMR (75 MHz, CDCl<sub>3</sub>)**

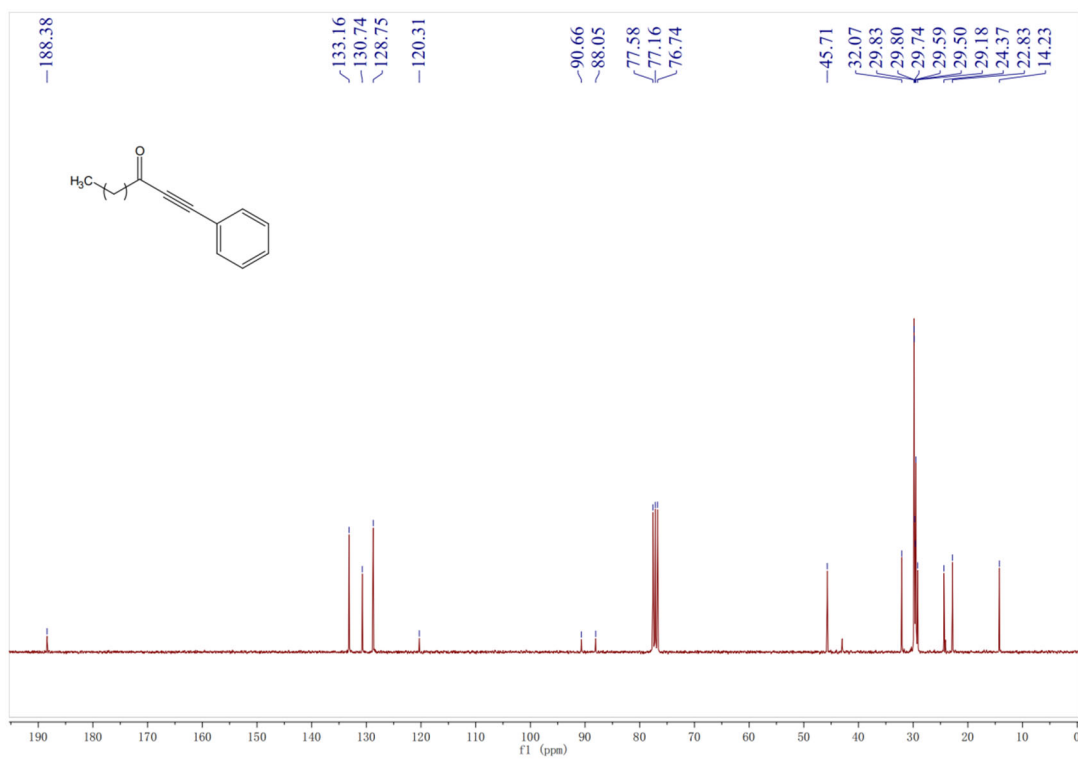

**1-Cyclohexyl-3-phenylprop-2-yn-1-one (3za) <sup>1</sup>H NMR (300 MHz, CDCl<sub>3</sub>)**

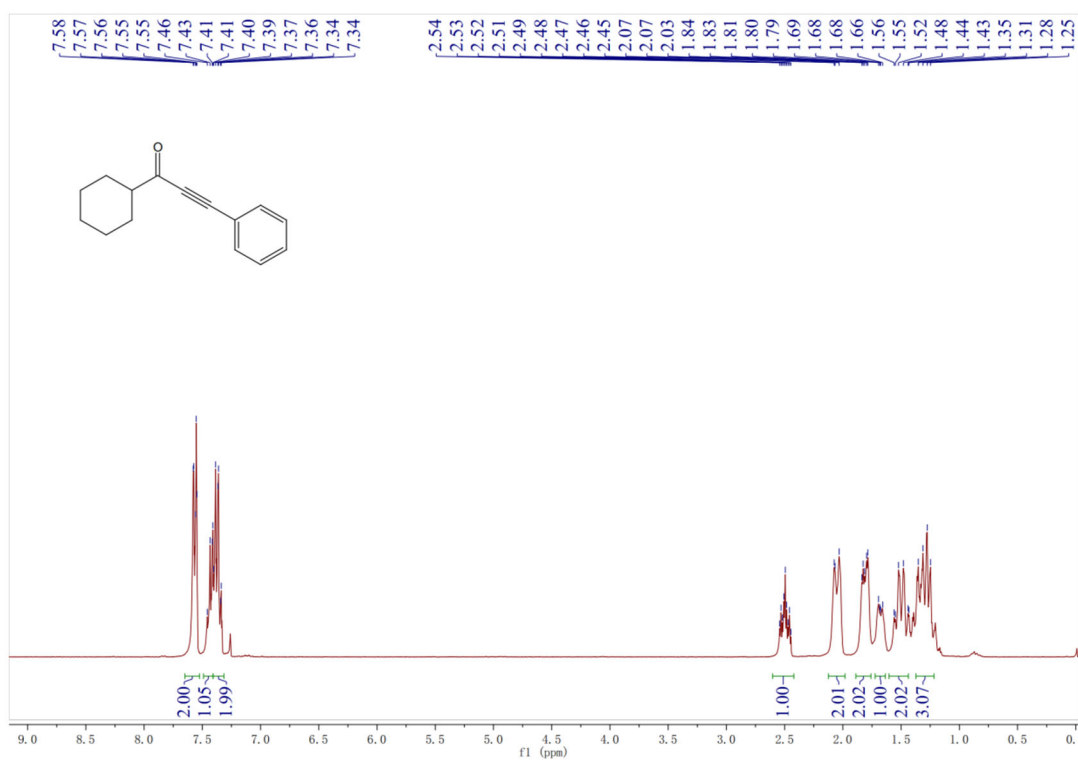

**1-Cyclohexyl-3-phenylprop-2-yn-1-one (3za) <sup>13</sup>C NMR (75 MHz, CDCl<sub>3</sub>)**

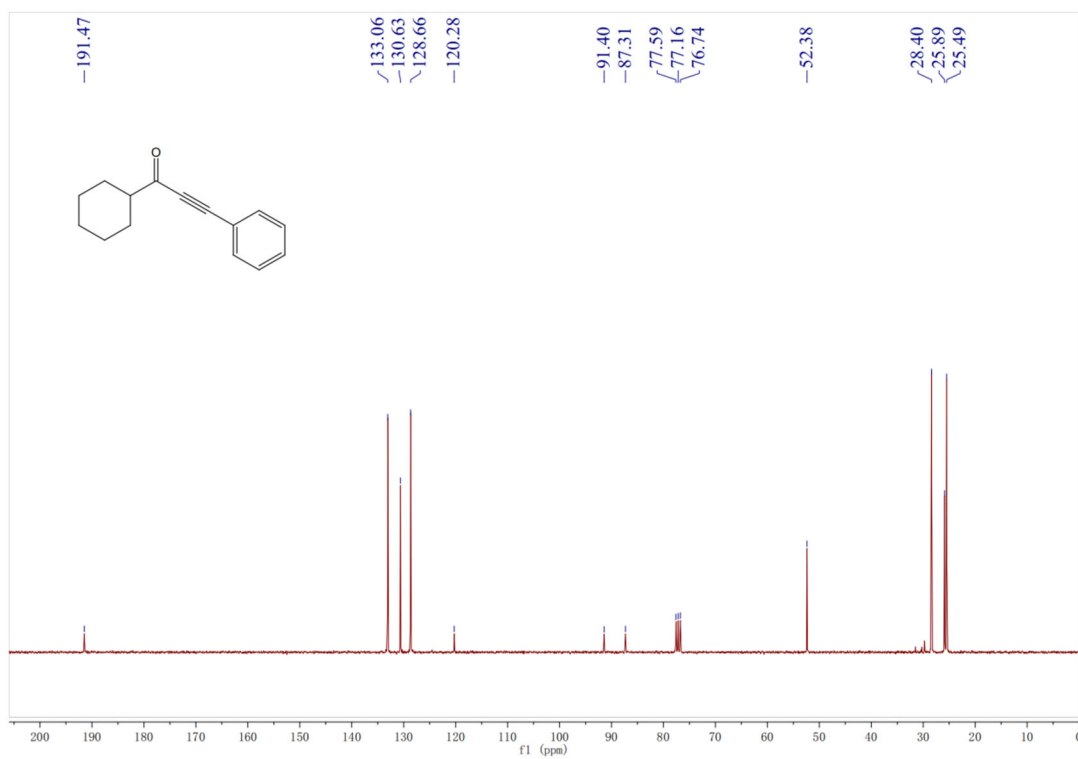

**1-Cyclopentyl-3-phenylprop-2-yn-1-one (3a'a) <sup>1</sup>H NMR (300 MHz, CDCl<sub>3</sub>)**

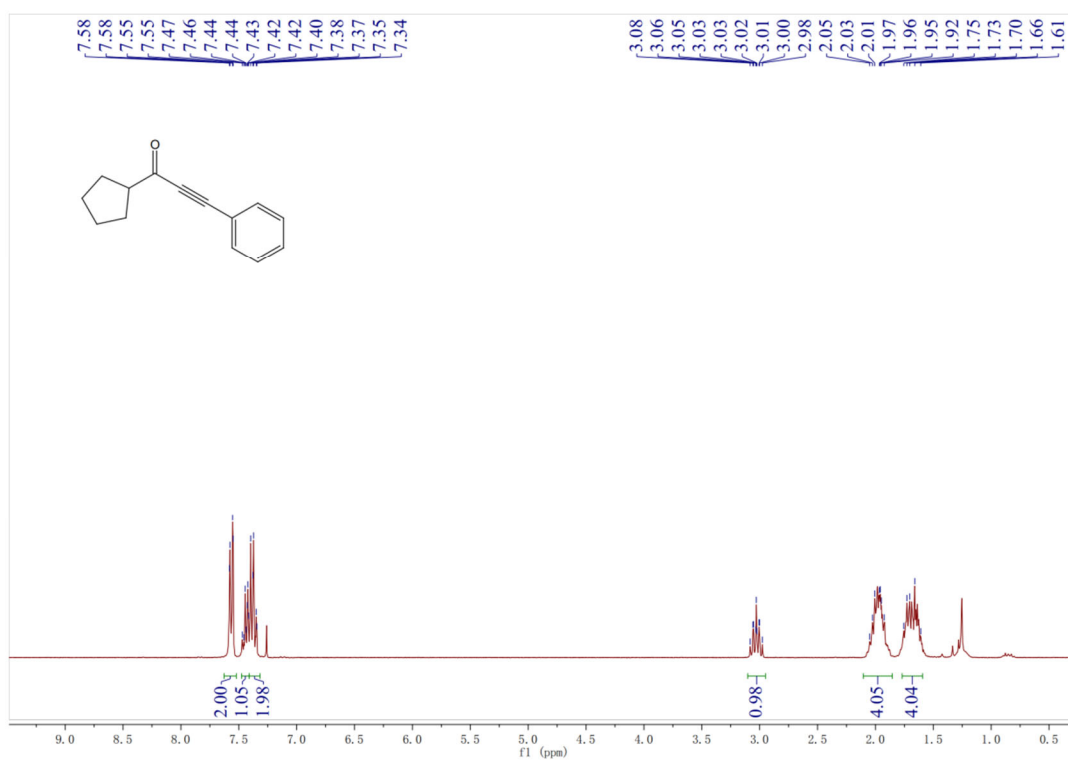

**1-Cyclopentyl-3-phenylprop-2-yn-1-one (3a'a) <sup>13</sup>C NMR (75 MHz, CDCl<sub>3</sub>)**

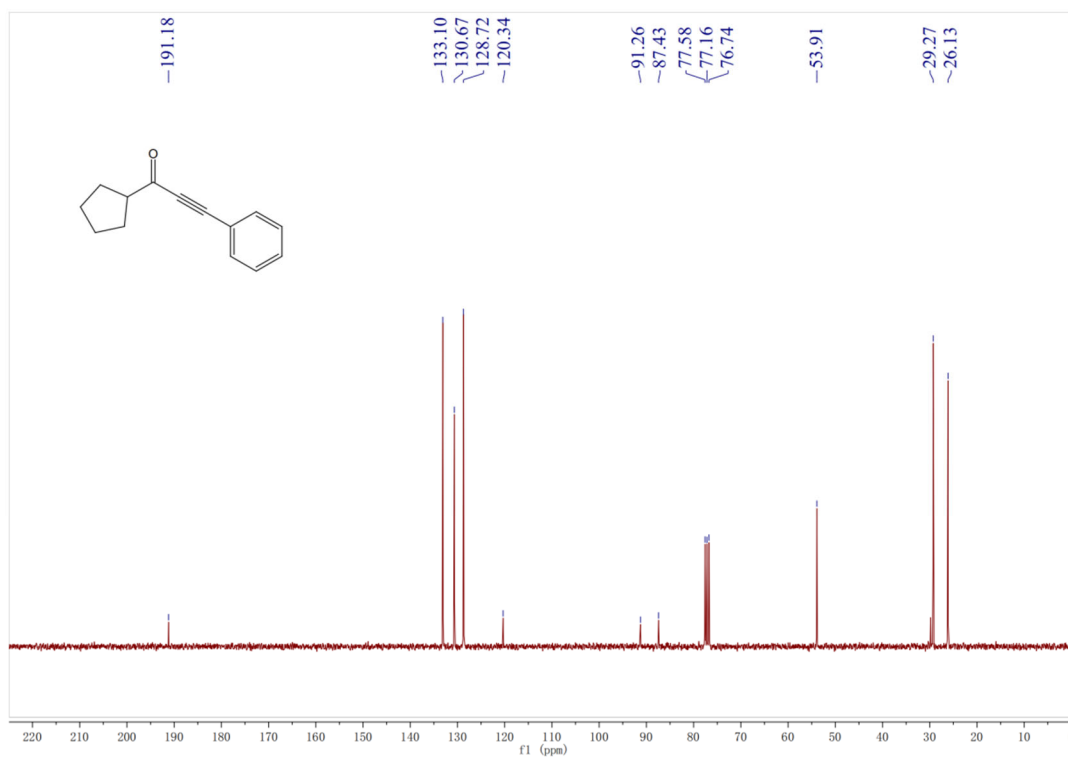

**1-((3r,5r,7r)-Adamantan-1-yl)-3-phenylprop-2-yn-1-one (3b'a) <sup>1</sup>H NMR (300 MHz, CDCl<sub>3</sub>)**

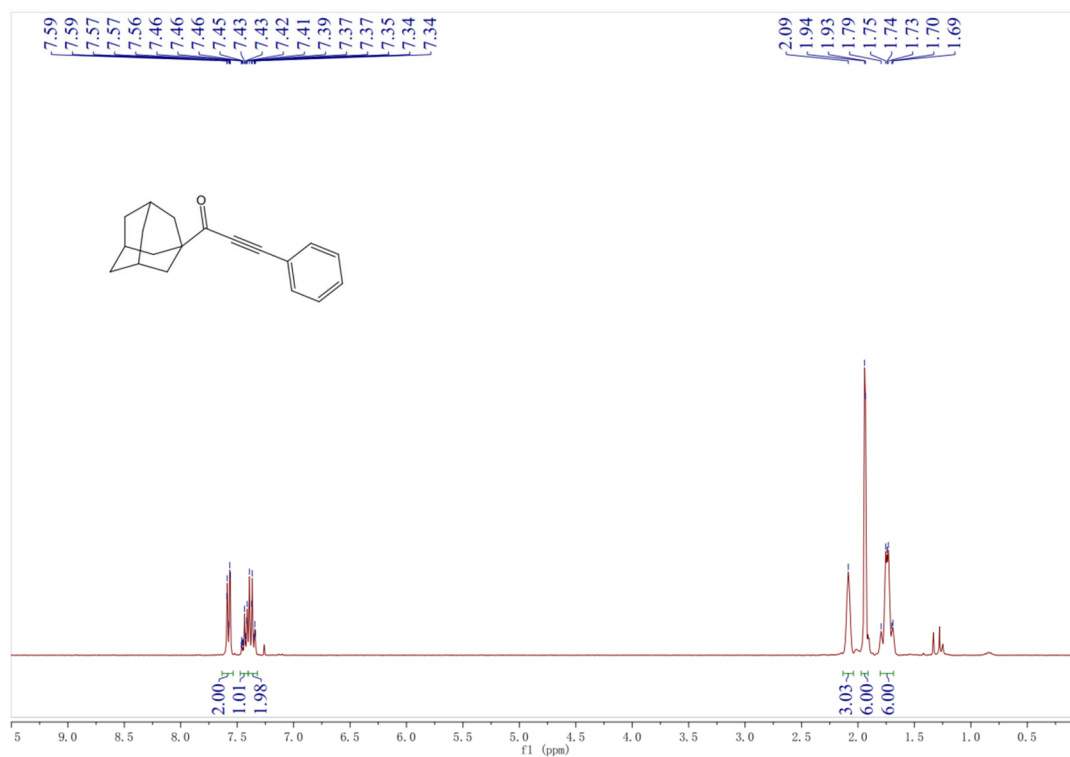

**1-((3r,5r,7r)-Adamantan-1-yl)-3-phenylprop-2-yn-1-one (3b'a) <sup>13</sup>C NMR (75 MHz, CDCl<sub>3</sub>)**

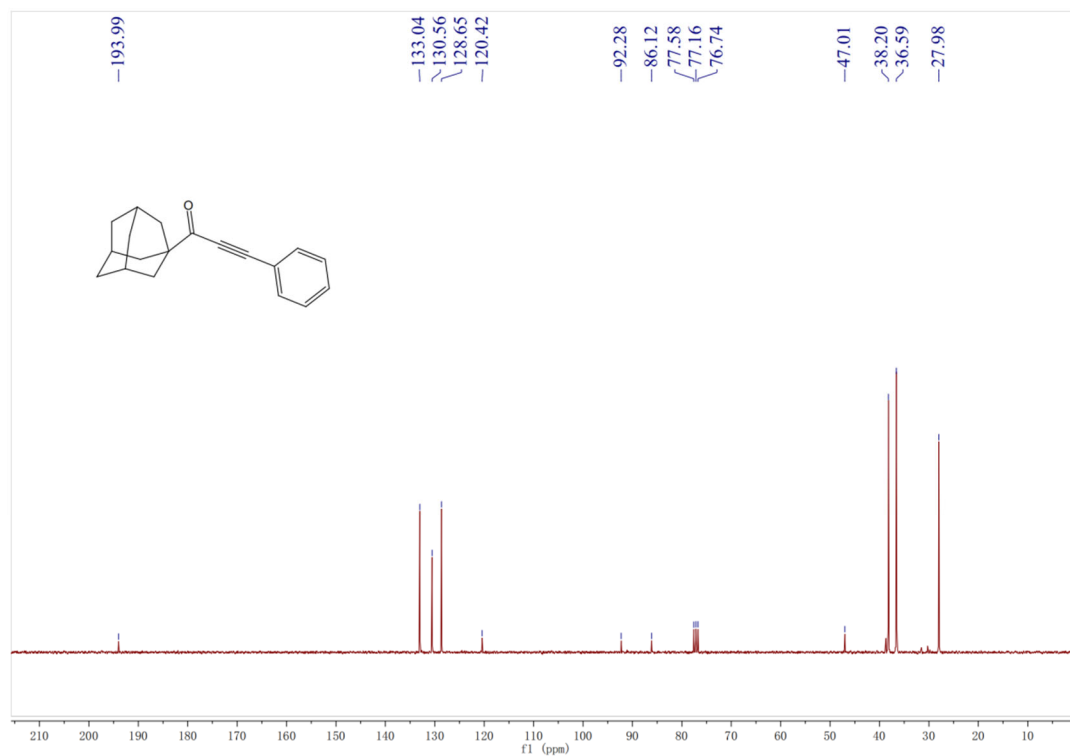



**1,5-Diphenylpent-1-yn-3-one (3c'a) <sup>1</sup>H NMR (300 MHz, CDCl<sub>3</sub>)**

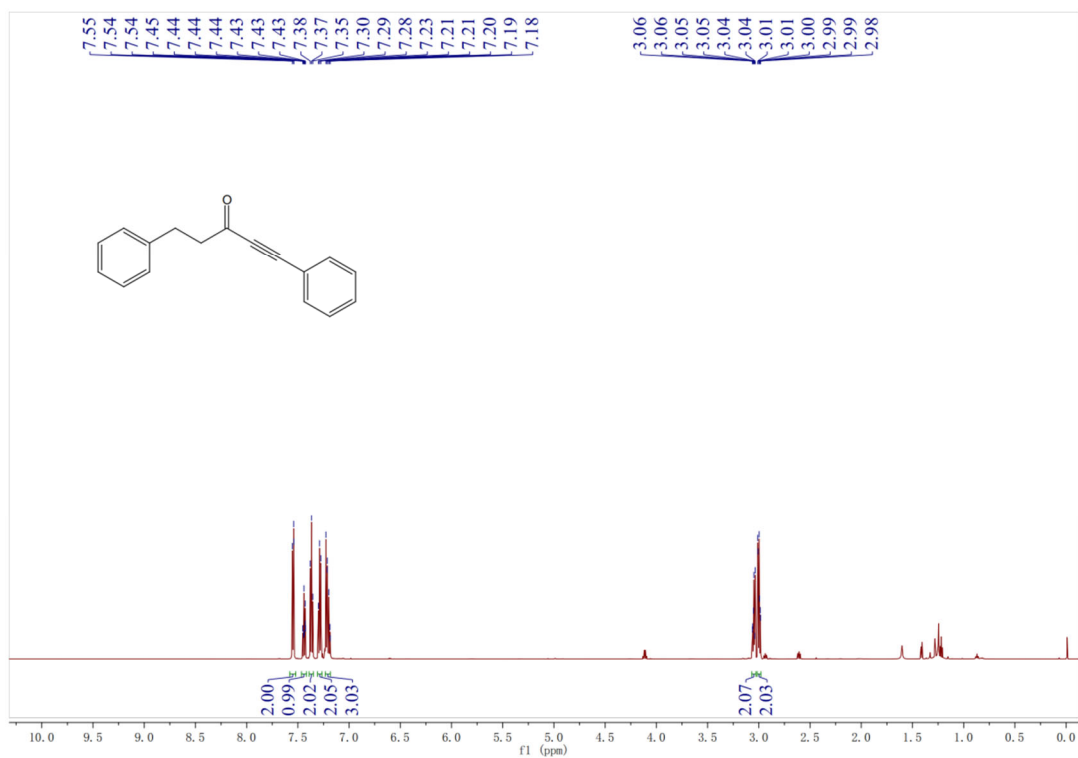

**1,5-Diphenylpent-1-yn-3-one (3c'a) <sup>13</sup>C NMR (75 MHz, CDCl<sub>3</sub>)**

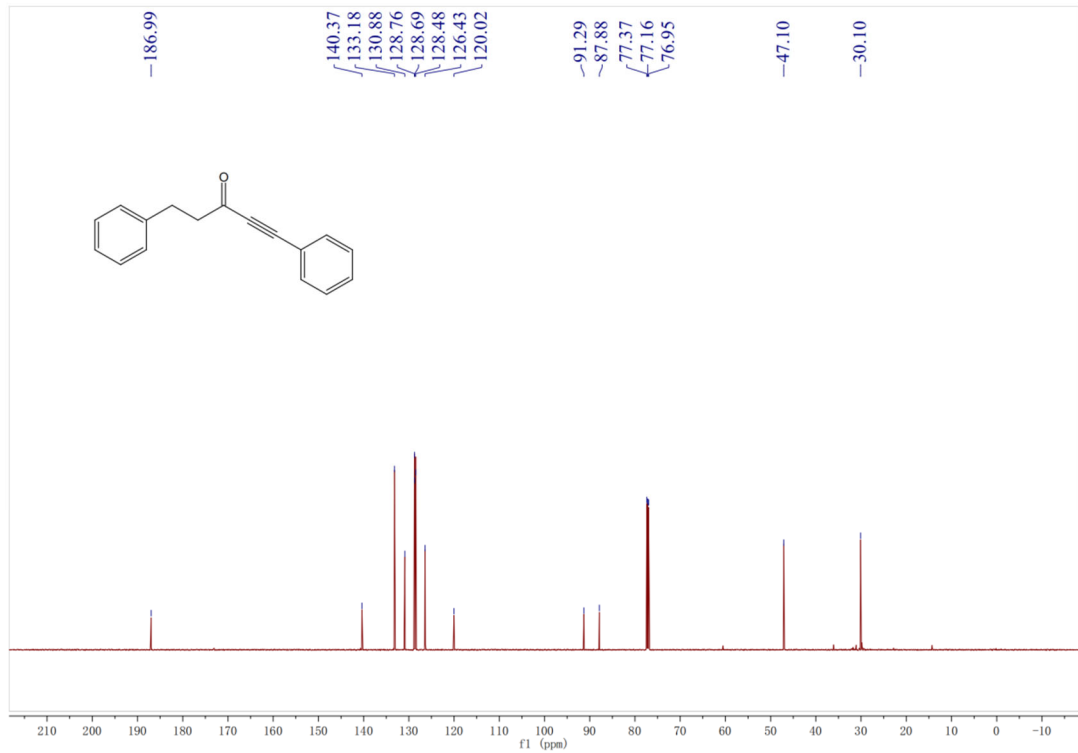

**(E)-1,5-diphenylpent-1-en-4-yn-3-one (3d'a) <sup>1</sup>H NMR (300 MHz, CDCl<sub>3</sub>)**

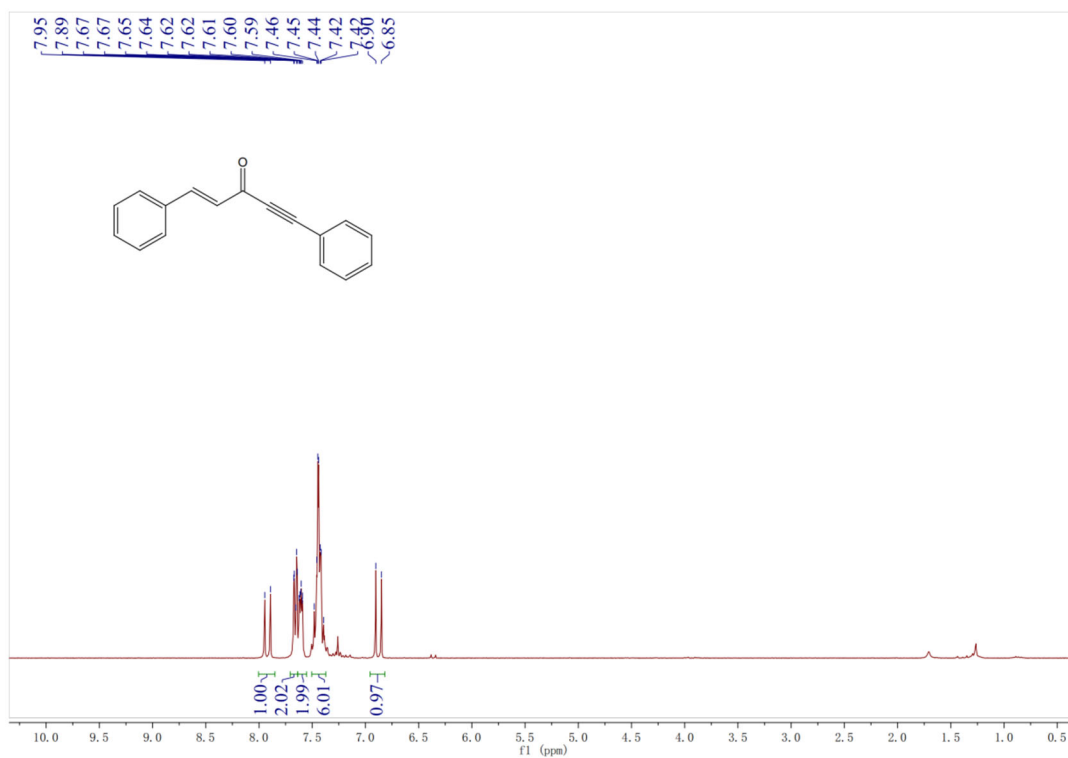

**(E)-1,5-diphenylpent-1-en-4-yn-3-one (3d'a) <sup>13</sup>C NMR (75 MHz, CDCl<sub>3</sub>)**

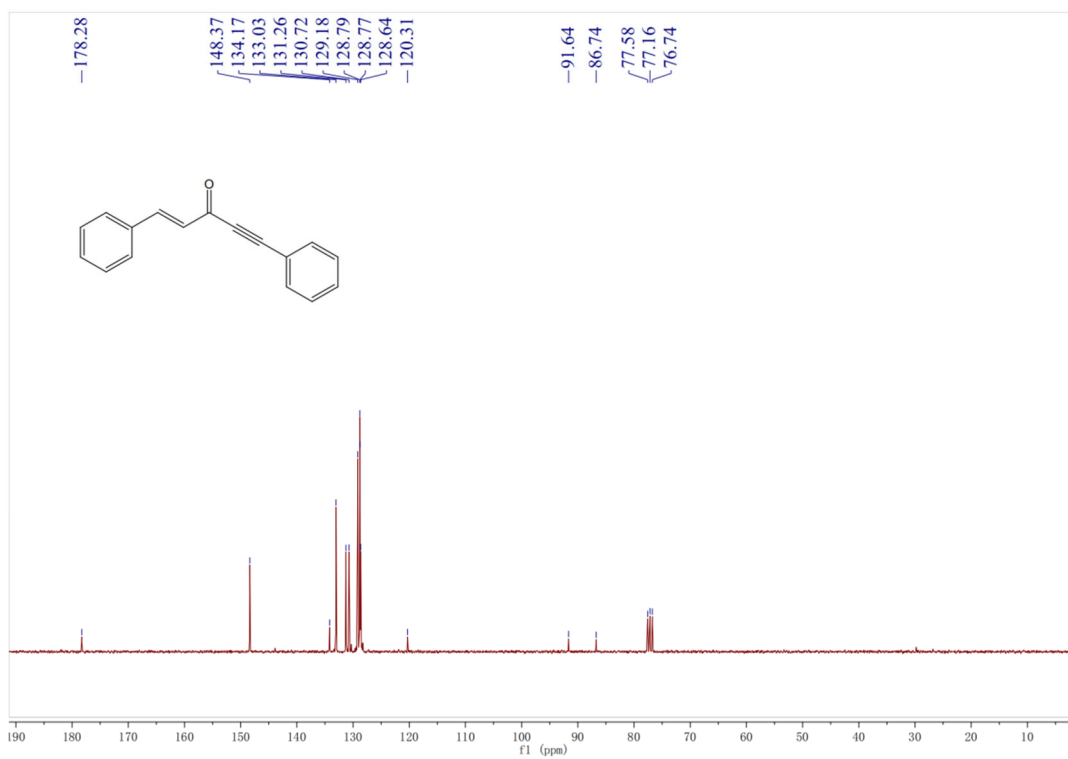

**1-Phenyl-3-(p-tolyl)prop-2-yn-1-one (3ab)  $^1\text{H}$  NMR (300 MHz,  $\text{CDCl}_3$ )**

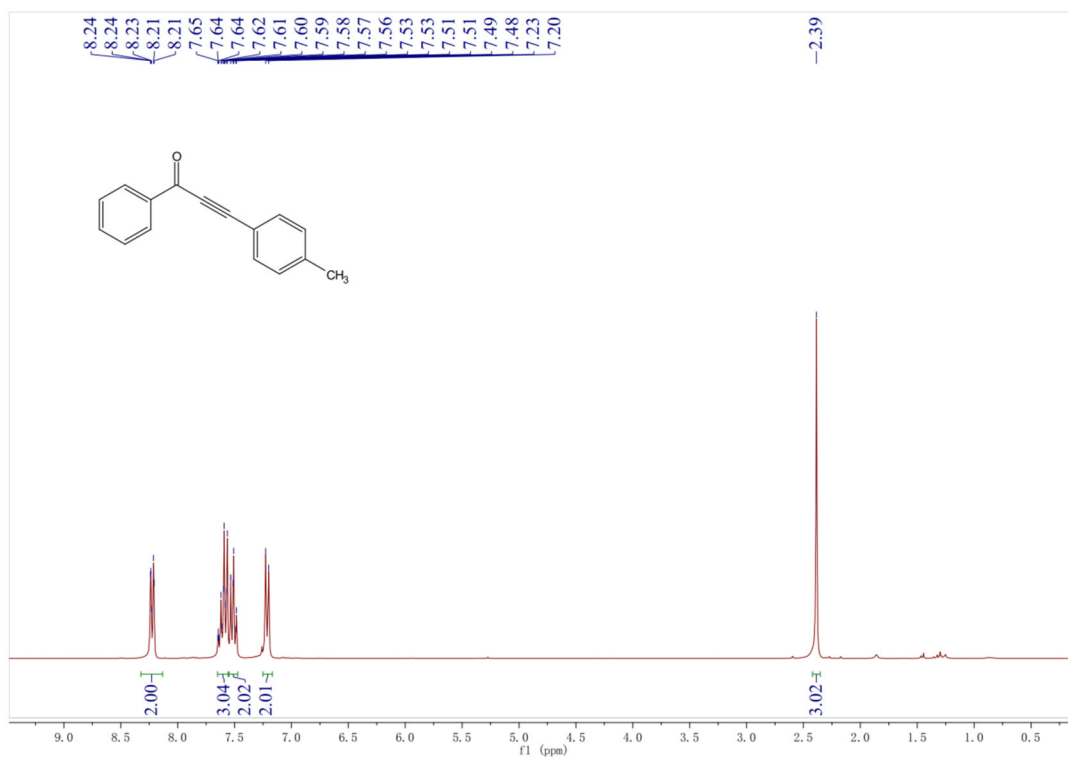

**1-Phenyl-3-(p-tolyl)prop-2-yn-1-one (3ab)  $^{13}\text{C}$  NMR (75 MHz,  $\text{CDCl}_3$ )**

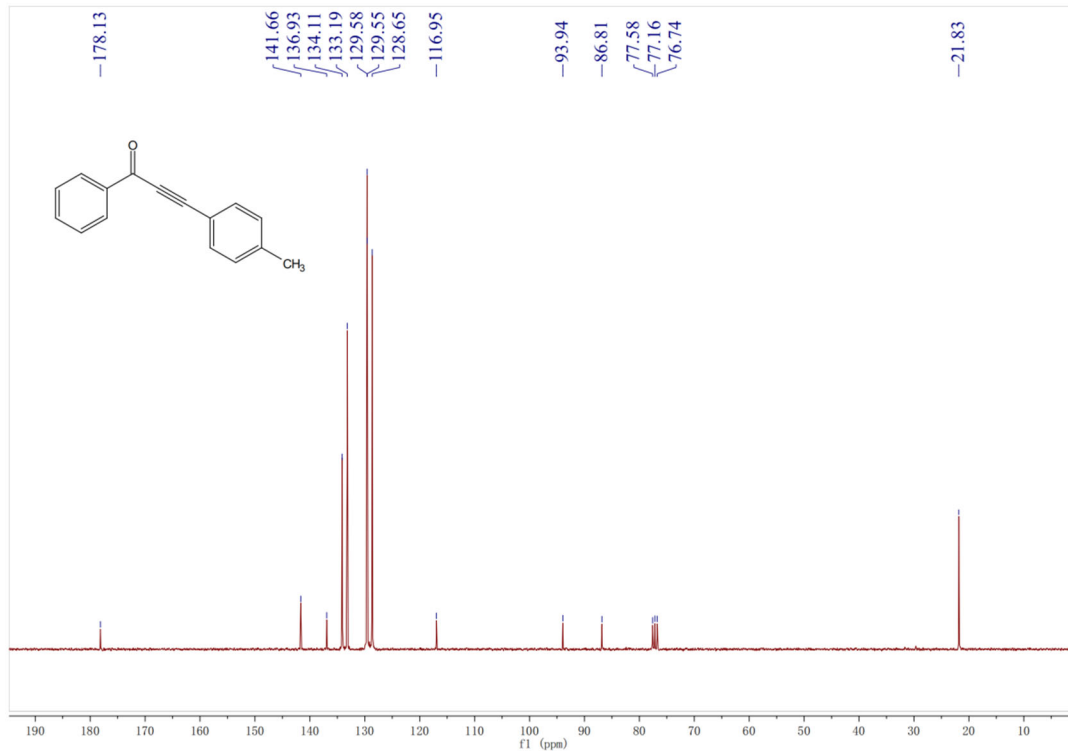

**3-(4-Ethylphenyl)-1-phenylprop-2-yn-1-one (3ac) <sup>1</sup>H NMR (300 MHz, CDCl<sub>3</sub>)**

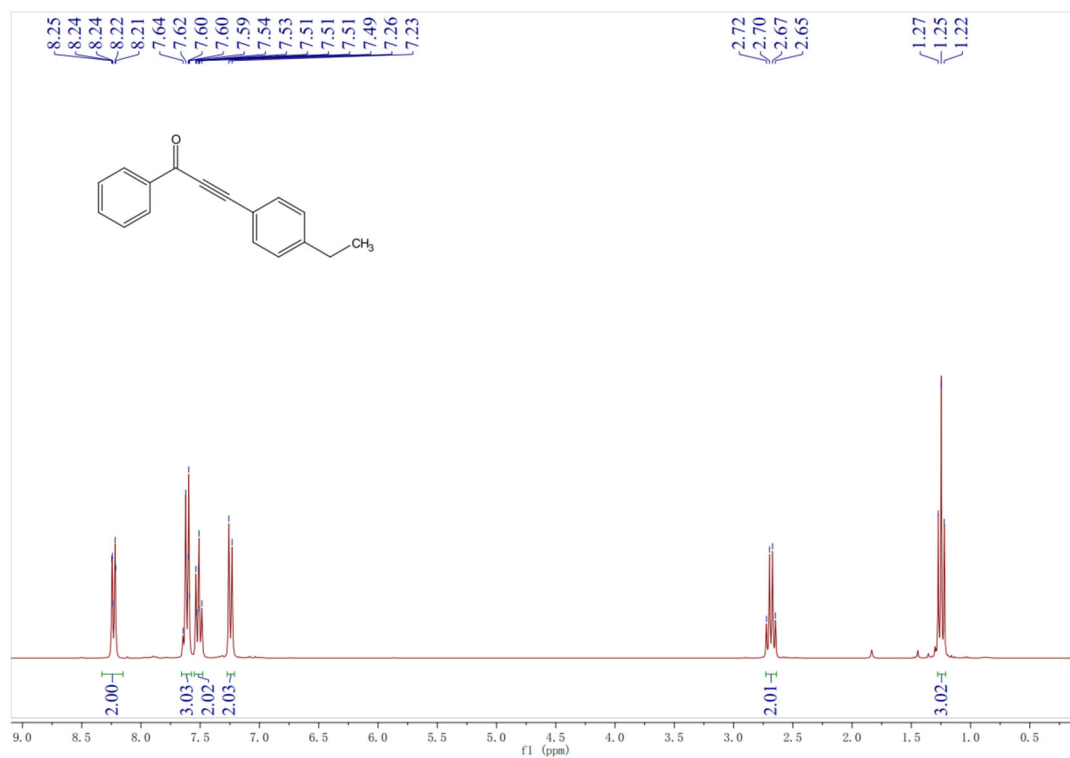

**3-(4-Ethylphenyl)-1-phenylprop-2-yn-1-one (3ac) <sup>13</sup>C NMR (75 MHz, CDCl<sub>3</sub>)**

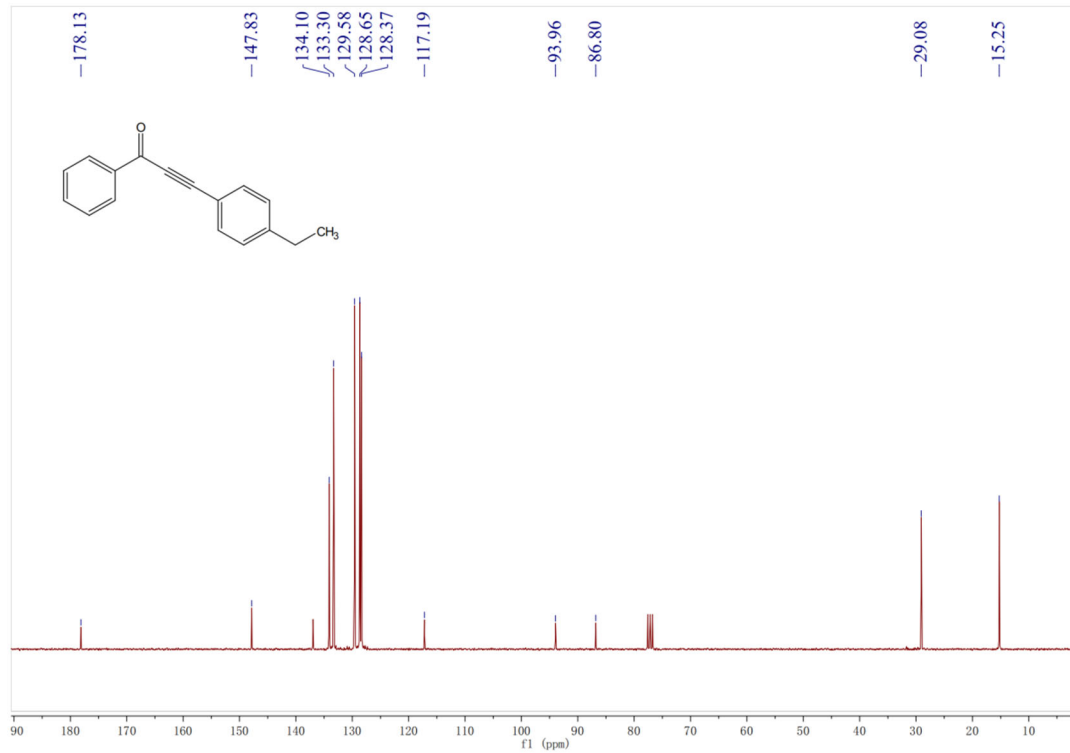

**3-(4-(Tert-butyl)phenyl)-1-phenylprop-2-yn-1-one (3ad) <sup>1</sup>H NMR (300 MHz, CDCl<sub>3</sub>)**

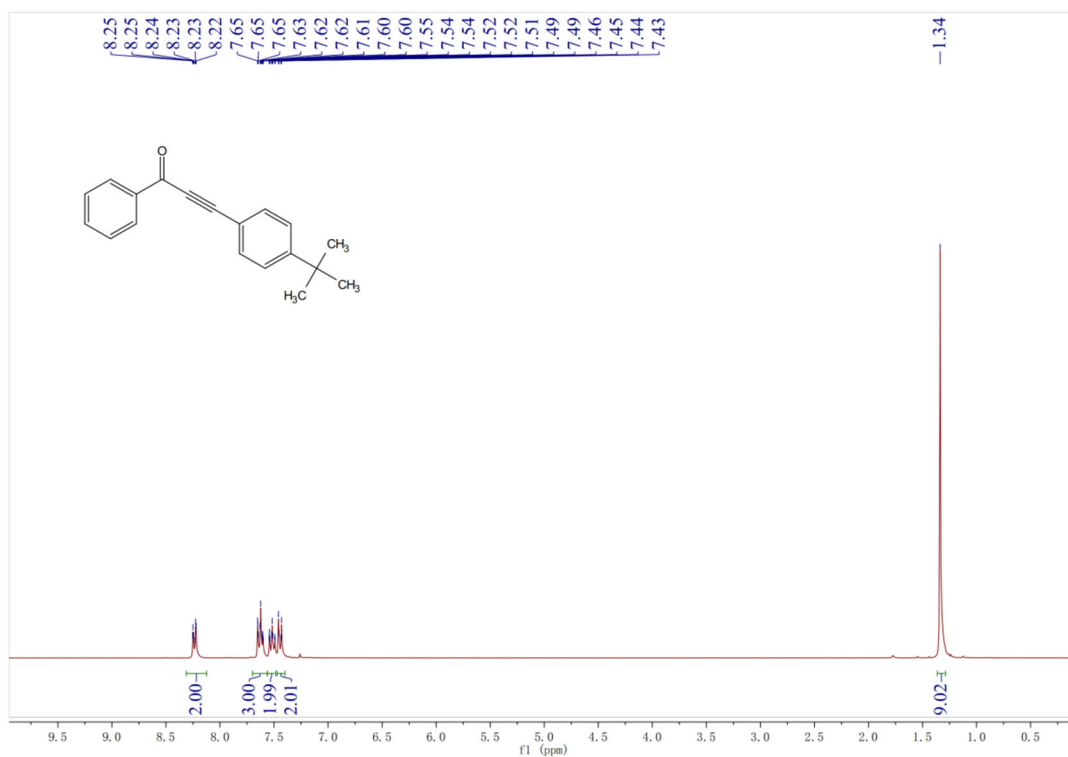

**3-(4-(Tert-butyl)phenyl)-1-phenylprop-2-yn-1-one (3ad) <sup>13</sup>C NMR (75 MHz, CDCl<sub>3</sub>)**

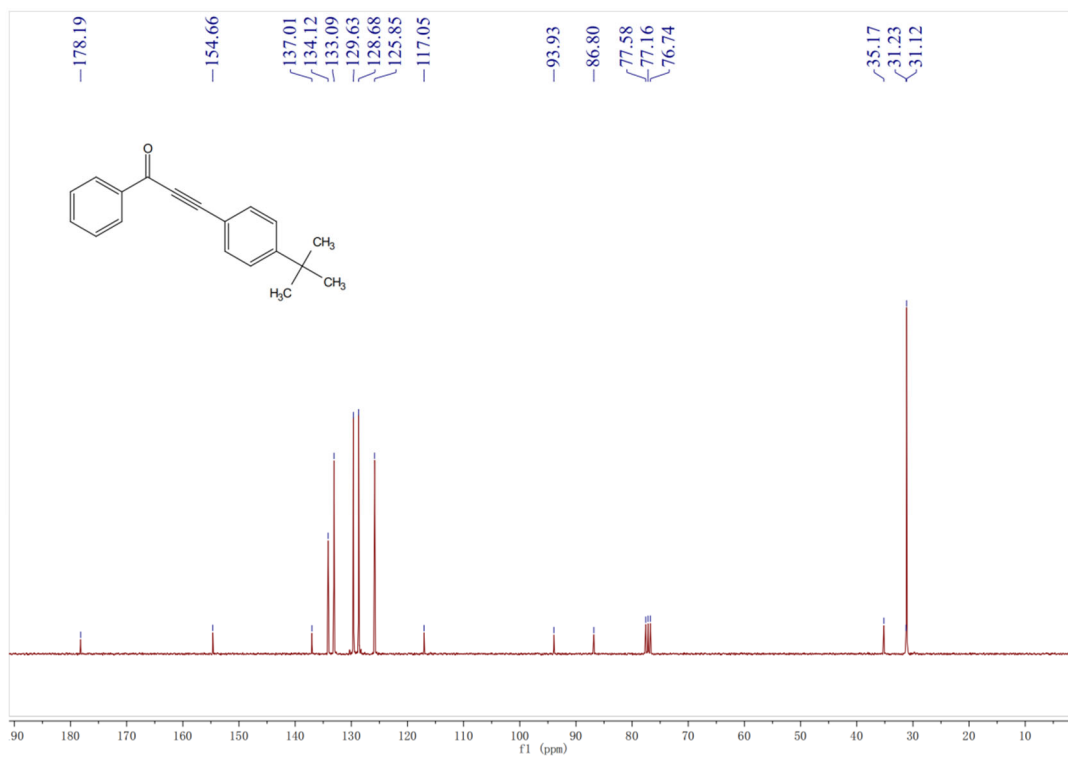

**3-(4-Methoxyphenyl)-1-phenylprop-2-yn-1-one (3ae) <sup>1</sup>H NMR (300 MHz, CDCl<sub>3</sub>)**

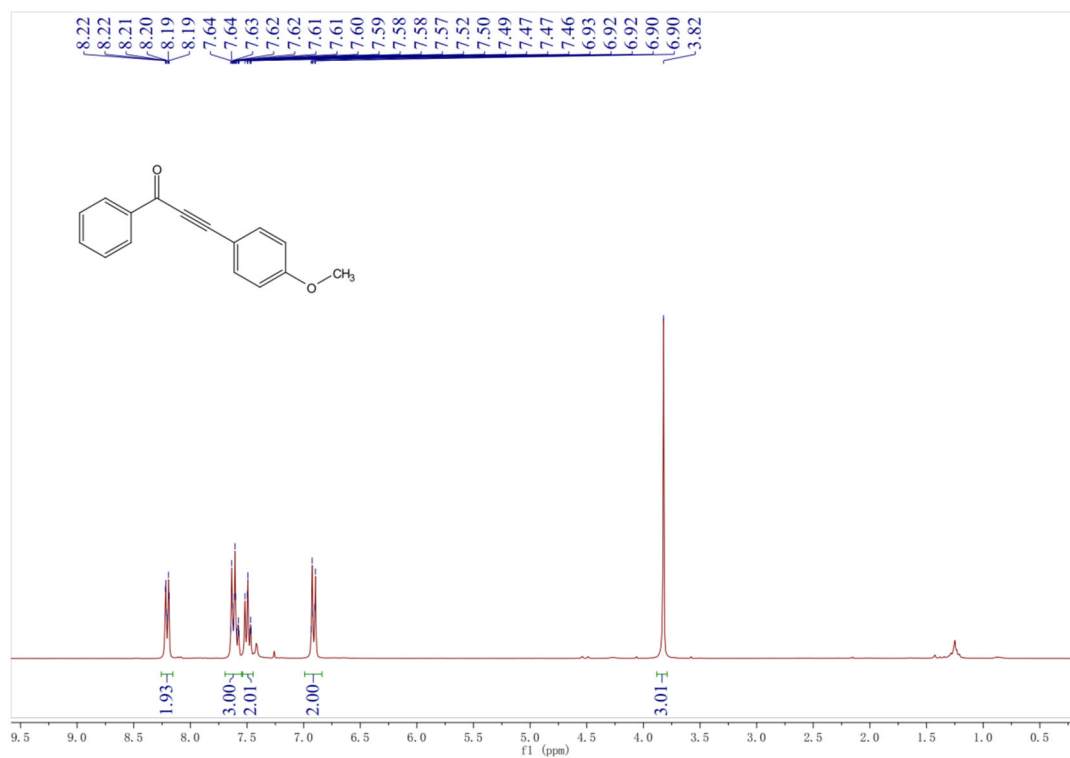

**3-(4-Methoxyphenyl)-1-phenylprop-2-yn-1-one (3ae) <sup>13</sup>C NMR (75 MHz, CDCl<sub>3</sub>)**

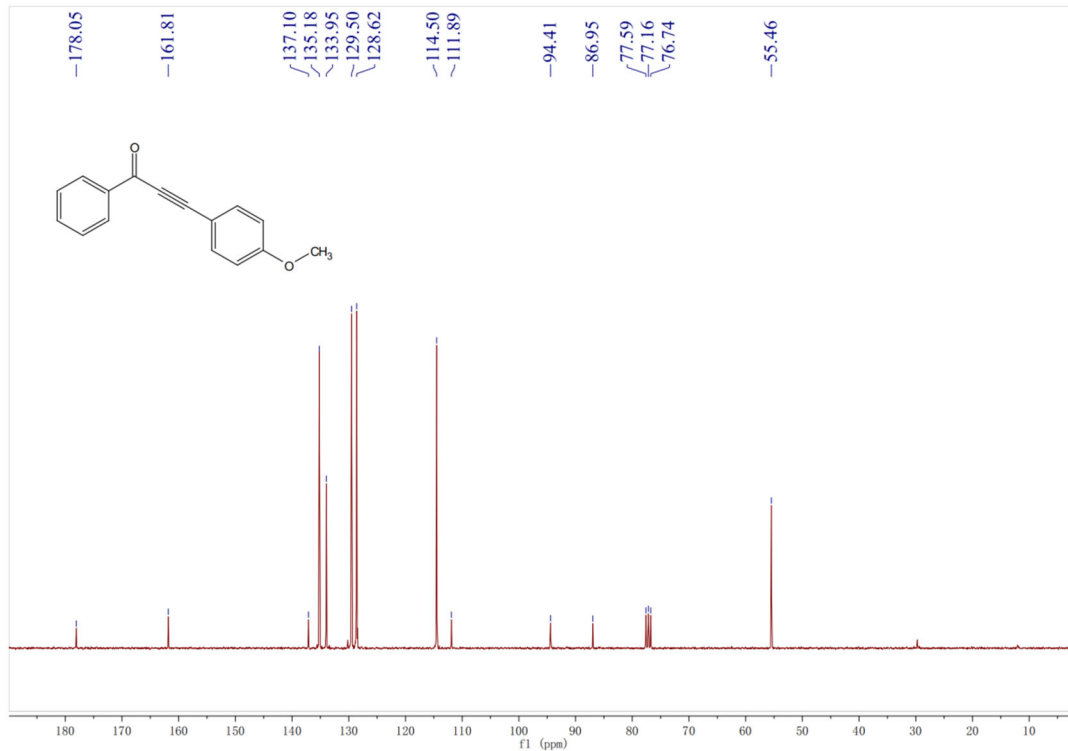

**1-Phenyl-3-(4-(trifluoromethyl)phenyl)prop-2-yn-1-one (3af) <sup>1</sup>H NMR (300 MHz, CDCl<sub>3</sub>)**

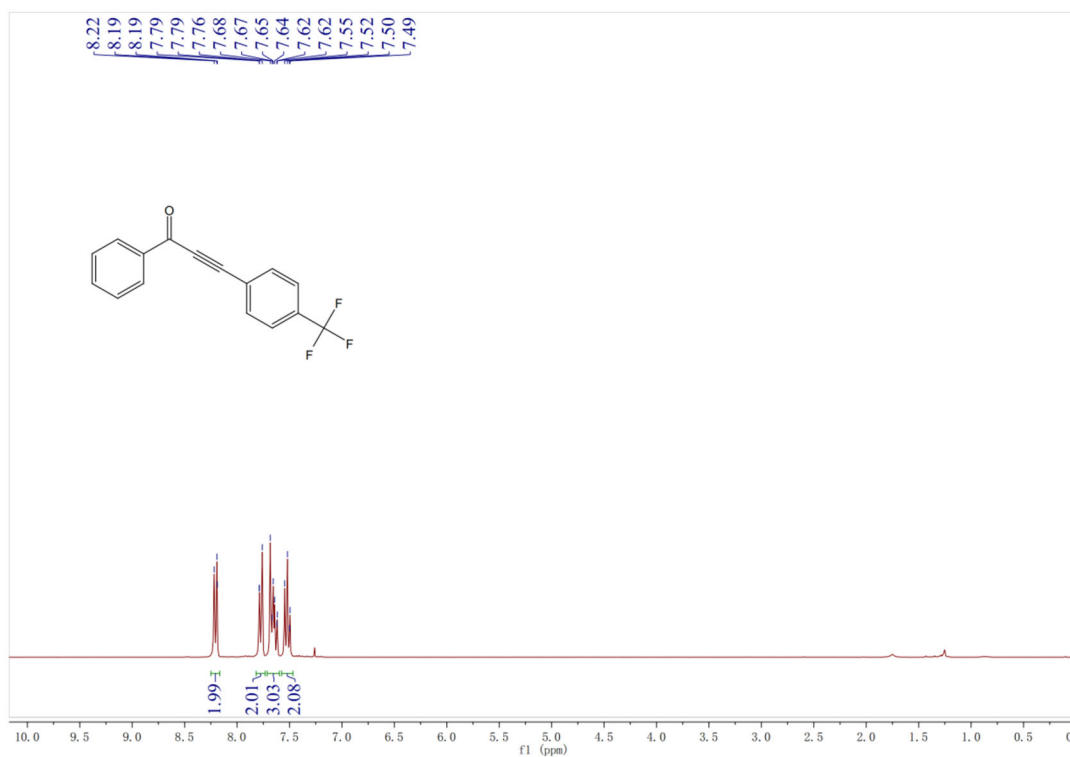

**1-Phenyl-3-(4-(trifluoromethyl)phenyl)prop-2-yn-1-one (3af) <sup>13</sup>C NMR (75 MHz, CDCl<sub>3</sub>)**

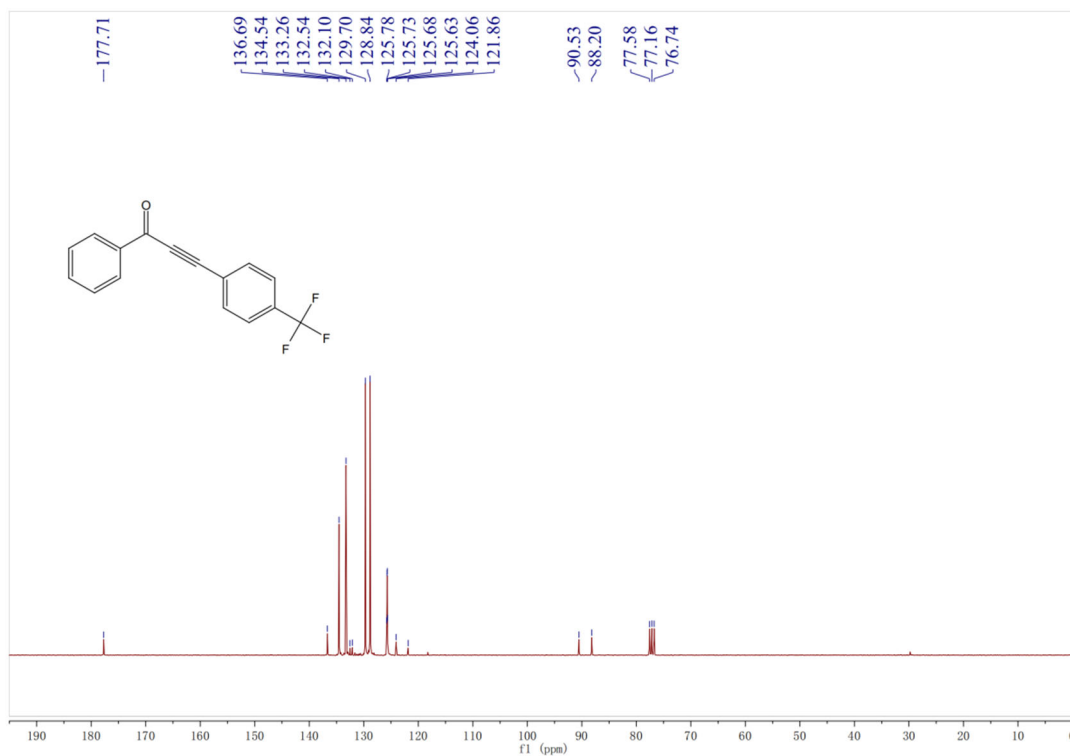

**3-(4-Nitrophenyl)-1-phenylprop-2-yn-1-one (3ag) <sup>1</sup>H NMR (300 MHz, CDCl<sub>3</sub>)**

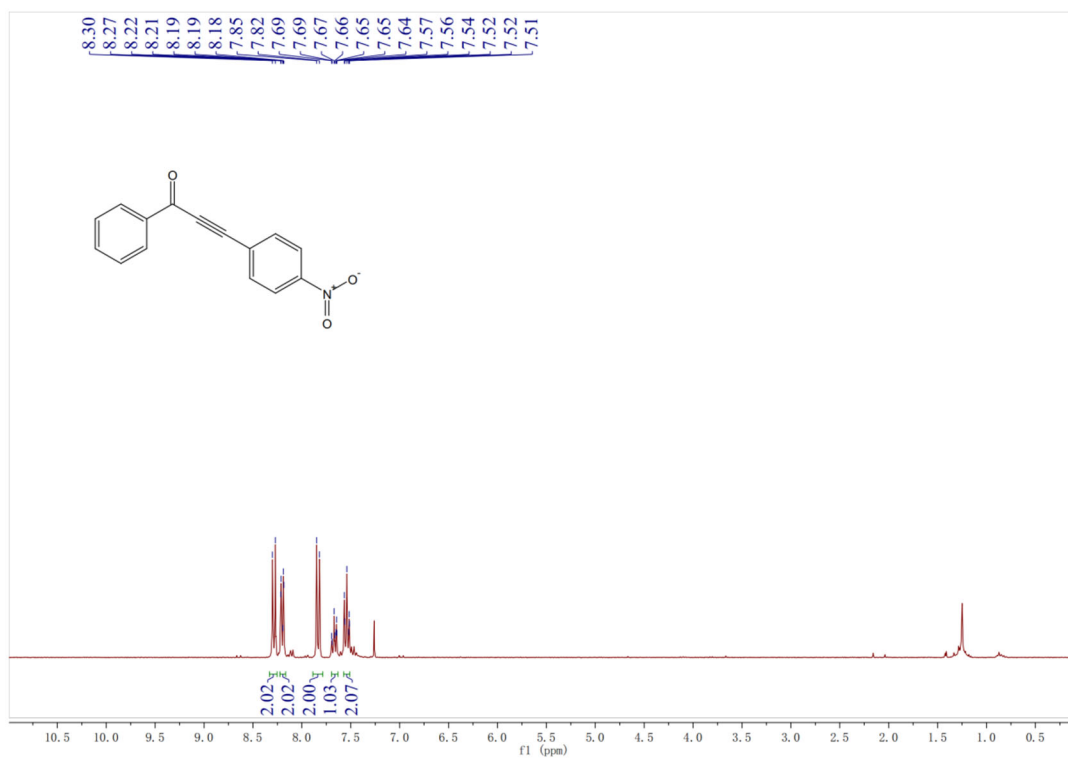

**3-(4-Nitrophenyl)-1-phenylprop-2-yn-1-one (3ag) <sup>13</sup>C NMR (75 MHz, CDCl<sub>3</sub>)**

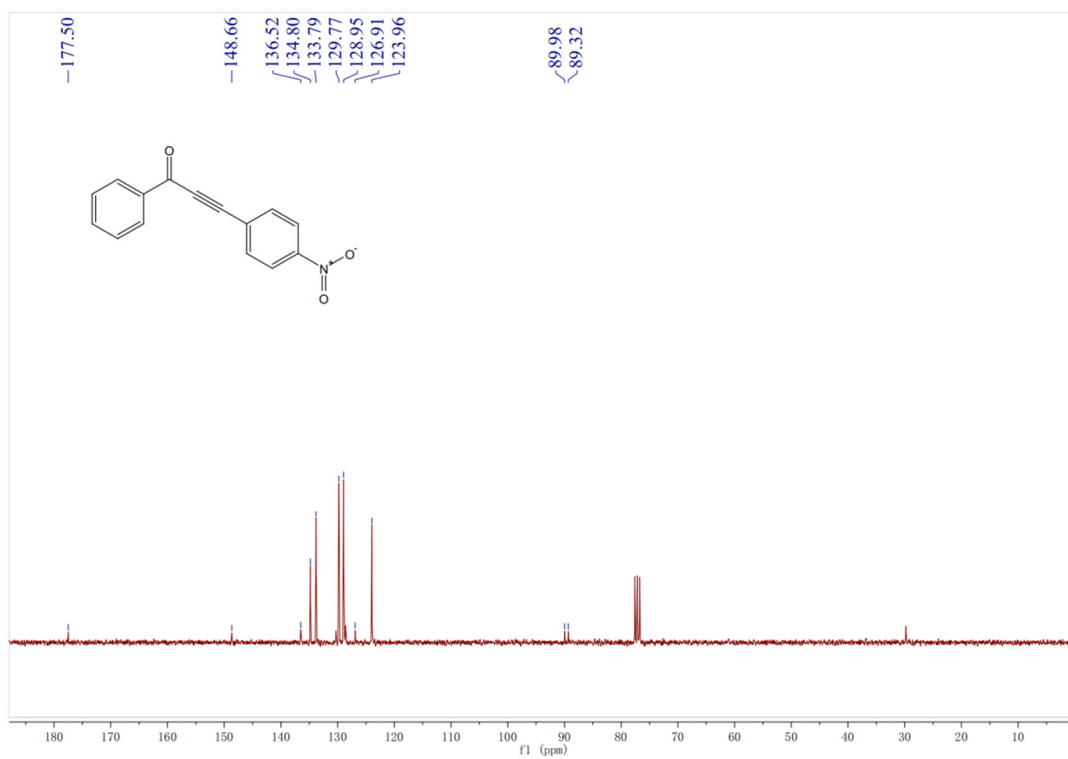



**3-(4-Fluorophenyl)-1-phenylprop-2-yn-1-one (3ah)  $^1\text{H}$  NMR (300 MHz,  $\text{CDCl}_3$ )**

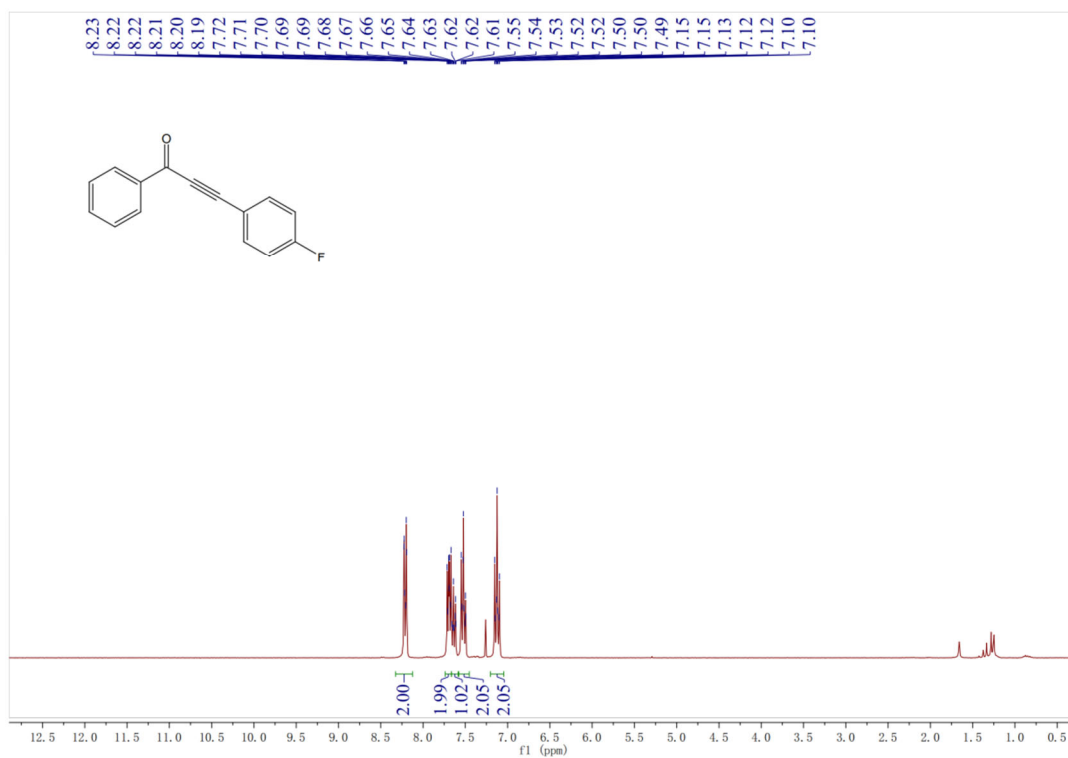

**3-(4-Fluorophenyl)-1-phenylprop-2-yn-1-one (3ah)  $^{13}\text{C}$  NMR (75 MHz,  $\text{CDCl}_3$ )**

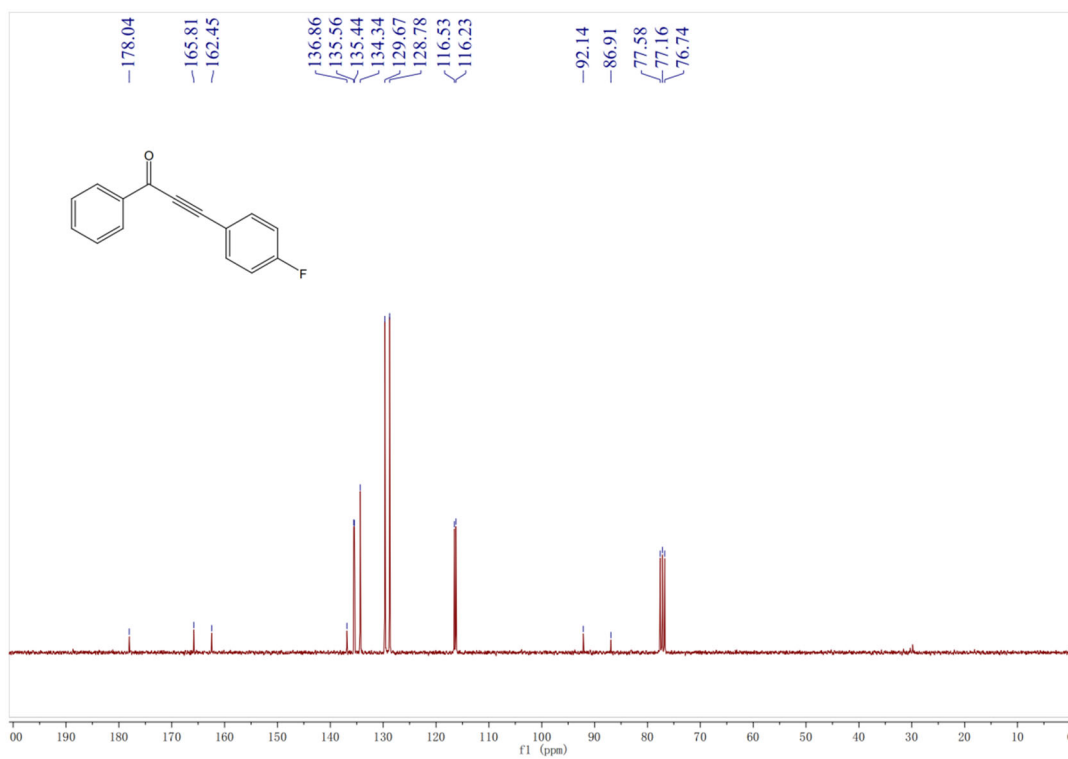

**1-Phenyl-3-(thiophen-3-yl)prop-2-yn-1-one (3ai)  $^1\text{H}$  NMR (300 MHz,  $\text{CDCl}_3$ )**

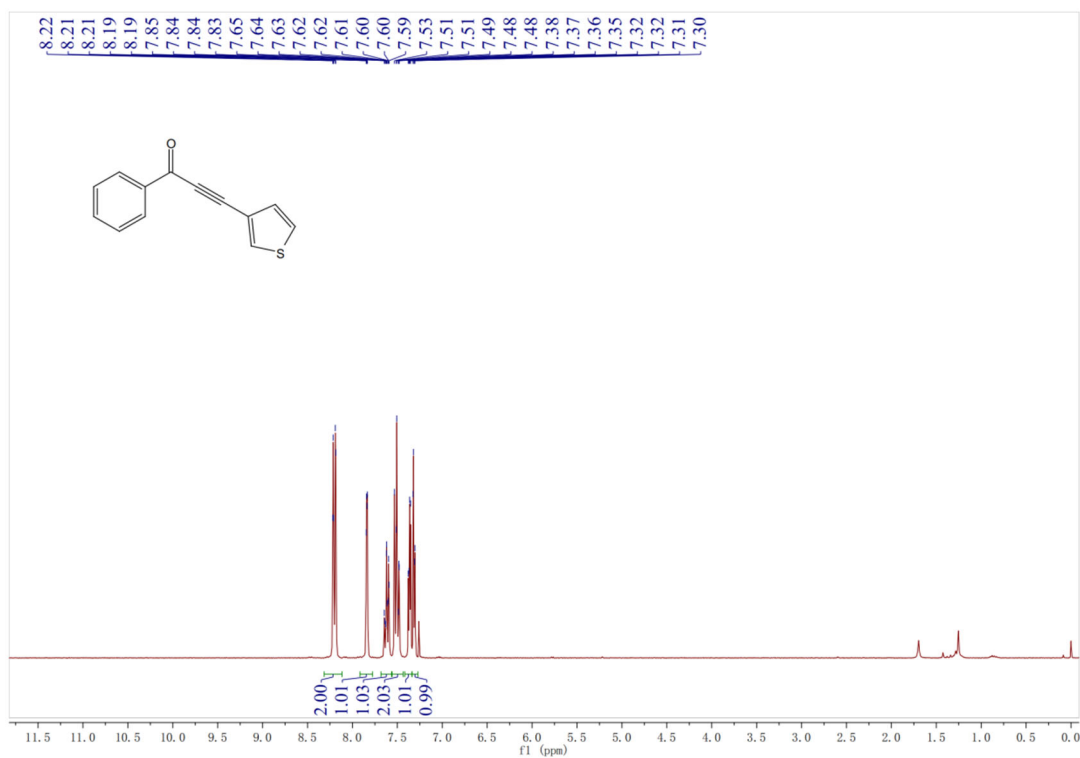

**1-Phenyl-3-(thiophen-3-yl)prop-2-yn-1-one (3ai)  $^{13}\text{C}$  NMR (75 MHz,  $\text{CDCl}_3$ )**

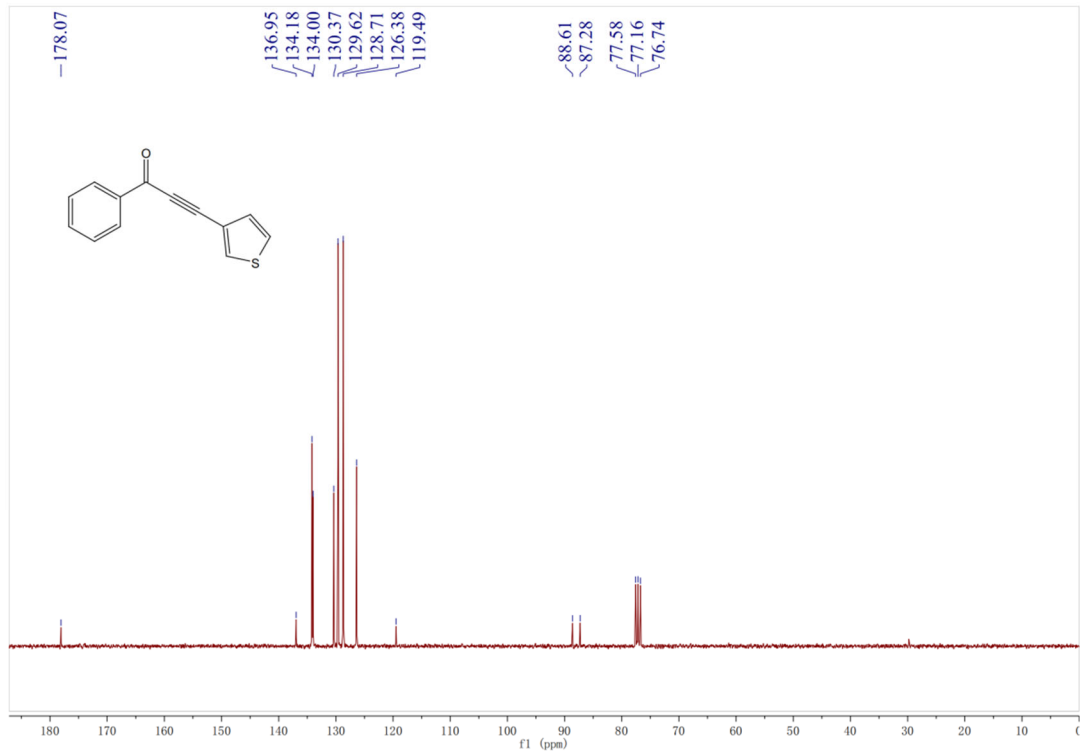

**1-Phenyl-3-(thiophen-2-yl)prop-2-yn-1-one (3aj) <sup>1</sup>H NMR (300 MHz, CDCl<sub>3</sub>)**

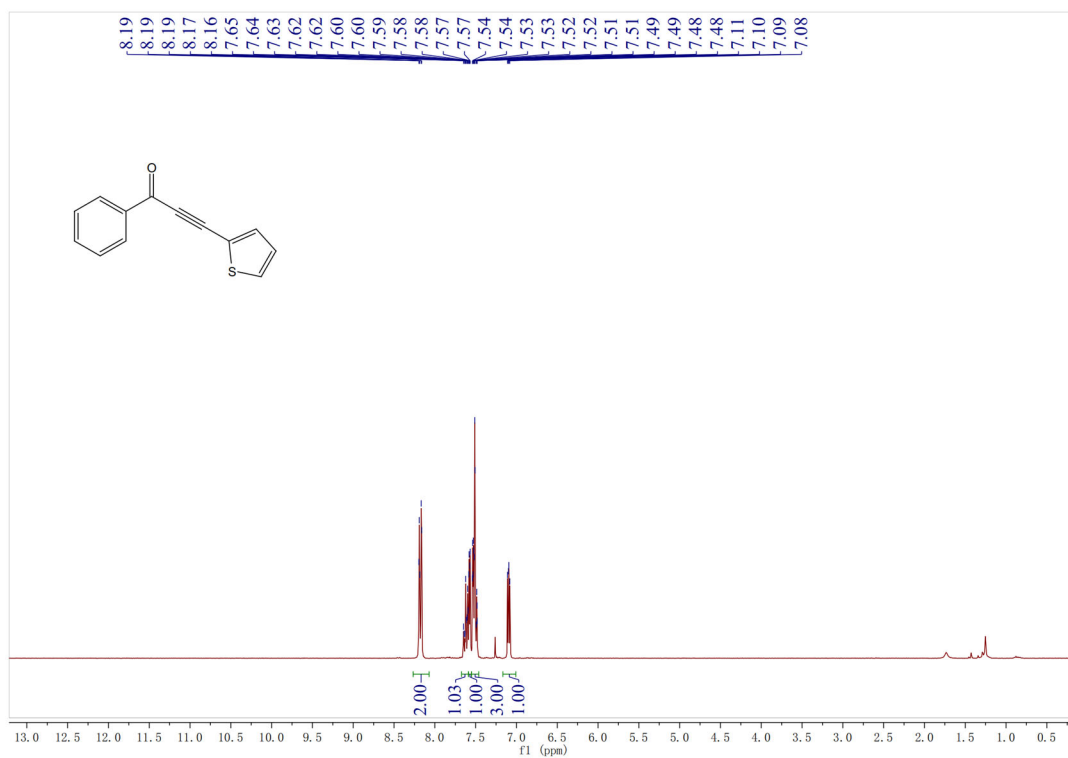

**1-Phenyl-3-(thiophen-2-yl)prop-2-yn-1-one (3aj) <sup>13</sup>C NMR (75 MHz, CDCl<sub>3</sub>)**

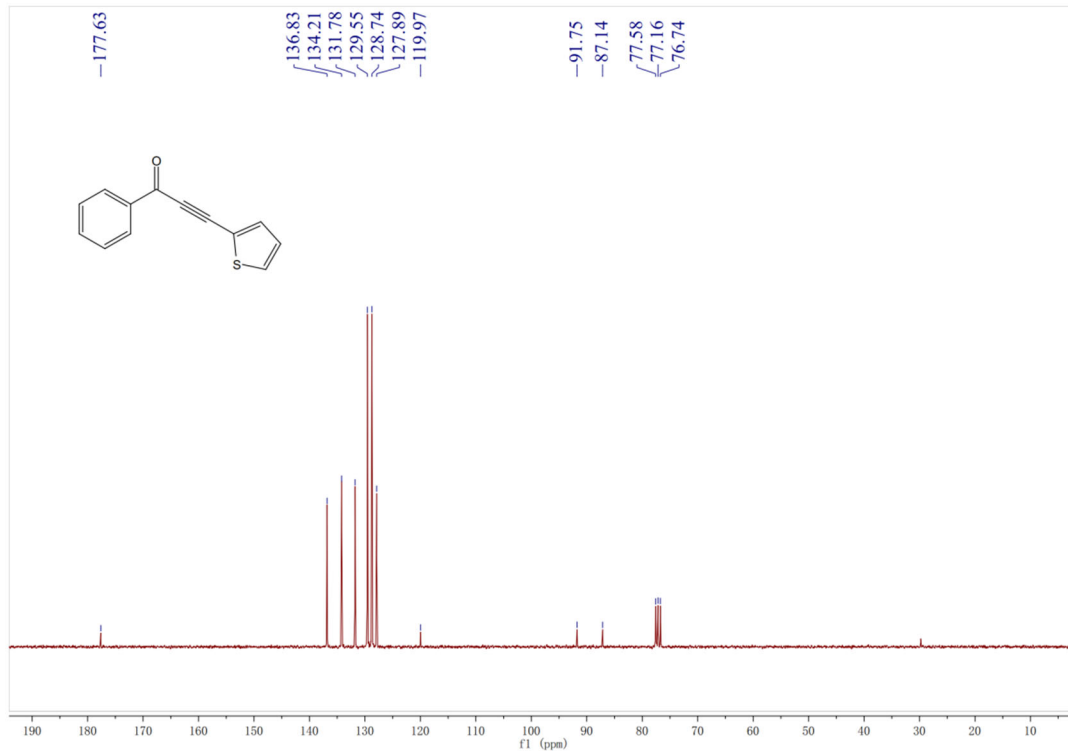

**3-cyclohexenyl-1-phenylprop-2-yn-1-one (3ak) <sup>1</sup>H NMR (300 MHz, CDCl<sub>3</sub>)**

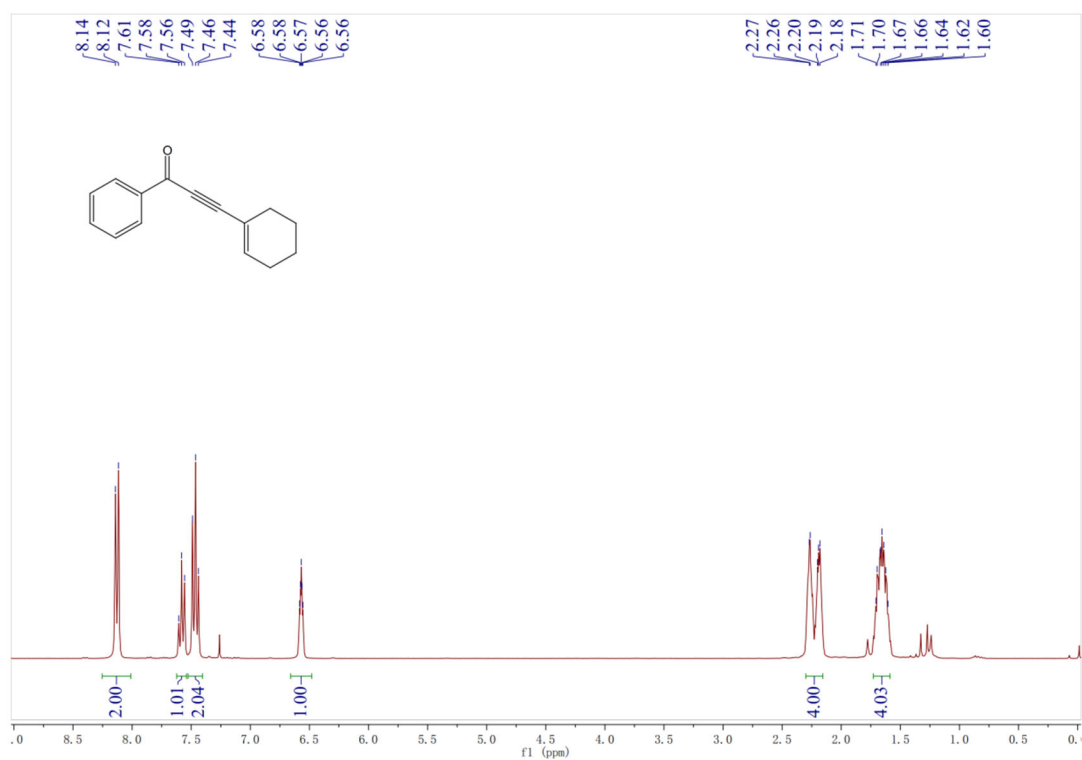

**3-cyclohexenyl-1-phenylprop-2-yn-1-one (3ak) <sup>13</sup>C NMR (75 MHz, CDCl<sub>3</sub>)**

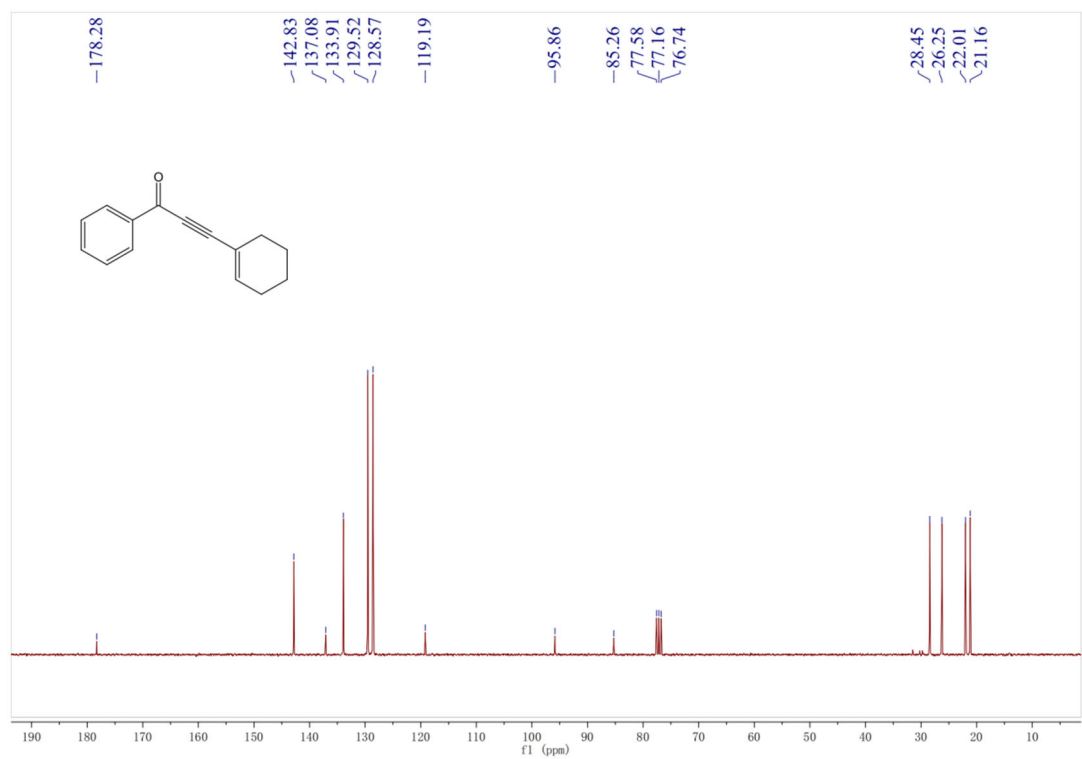

### 1-Phenyl-2-octyn-1-one (3a) $^1\text{H}$ NMR (300 MHz, $\text{CDCl}_3$ )

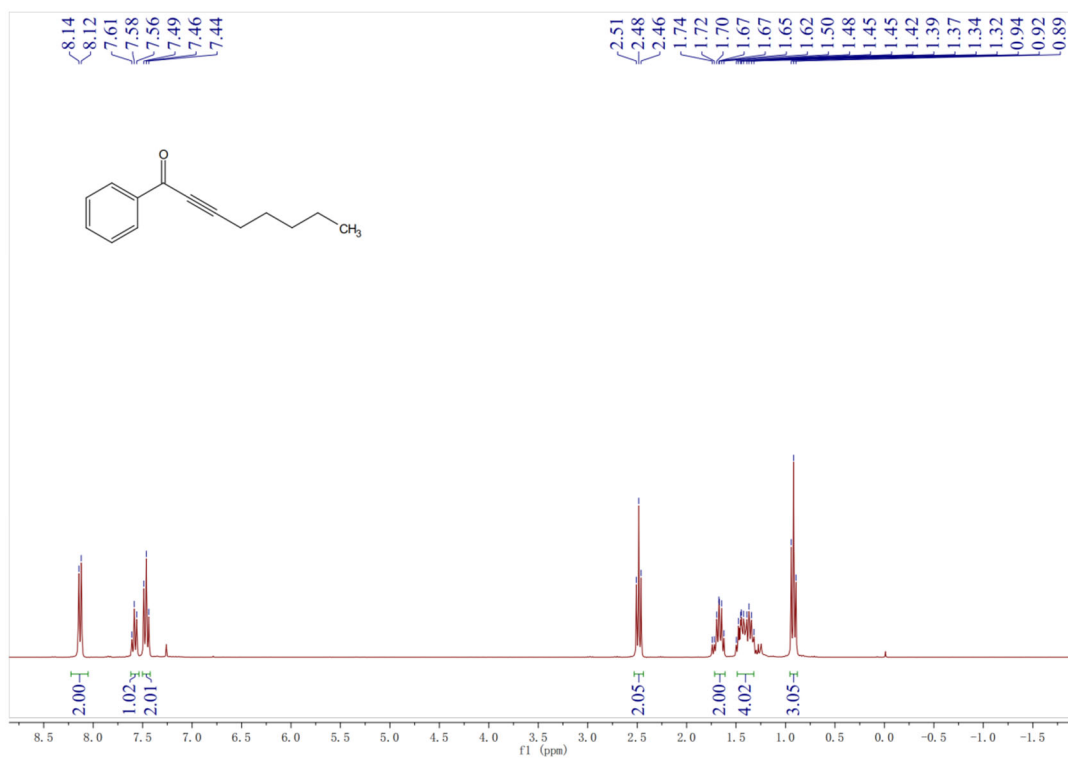

### 1-Phenyl-2-octyn-1-one (3a) $^{13}\text{C}$ NMR (75 MHz, $\text{CDCl}_3$ )

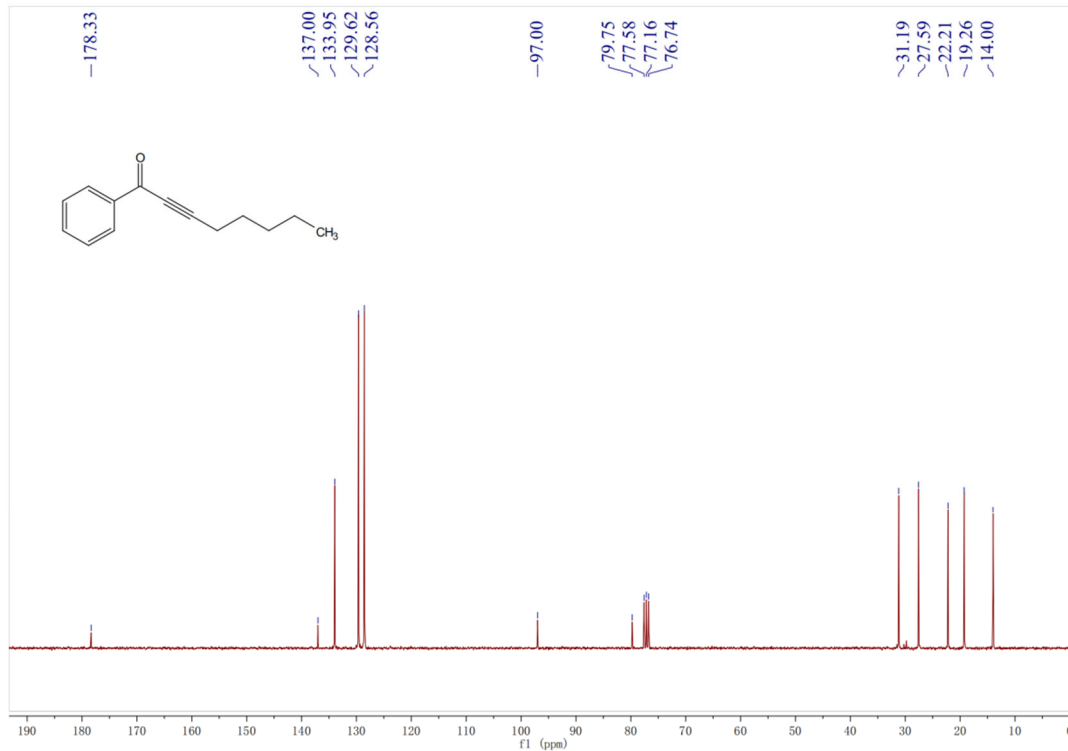

**3-Cyclopropyl-1-phenylprop-2-yn-1-one (3am) <sup>1</sup>H NMR (300 MHz, CDCl<sub>3</sub>)**

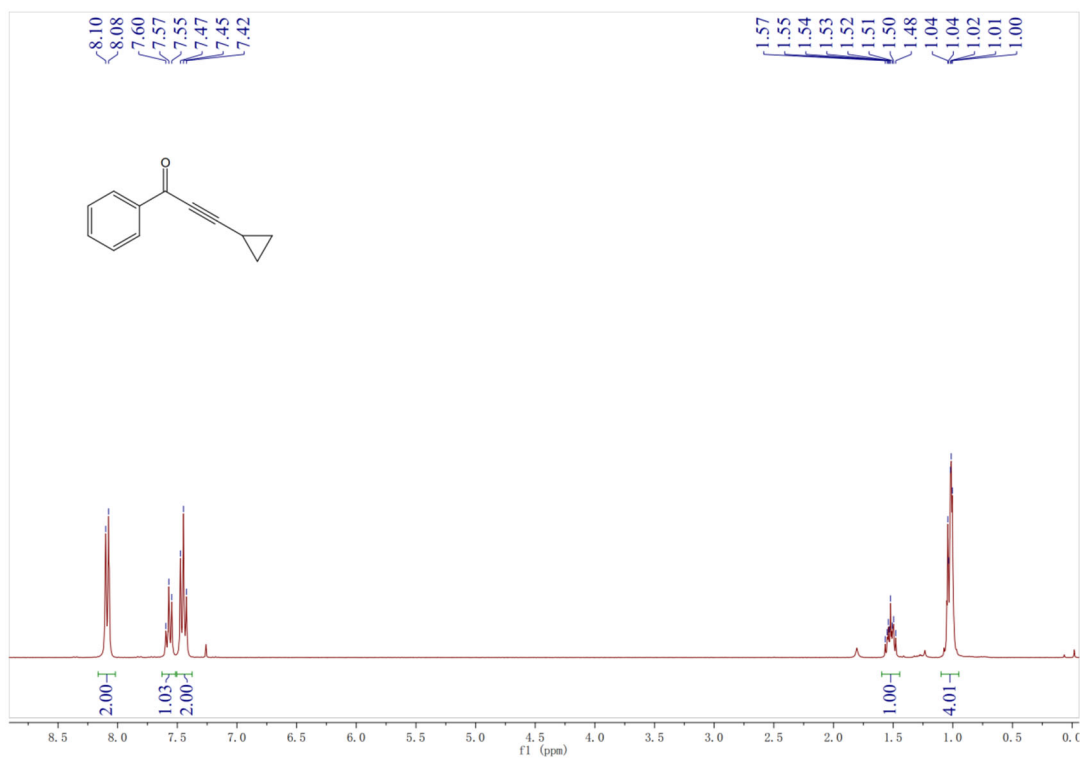

**3-Cyclopropyl-1-phenylprop-2-yn-1-one (3am) <sup>13</sup>C NMR (75 MHz, CDCl<sub>3</sub>)**

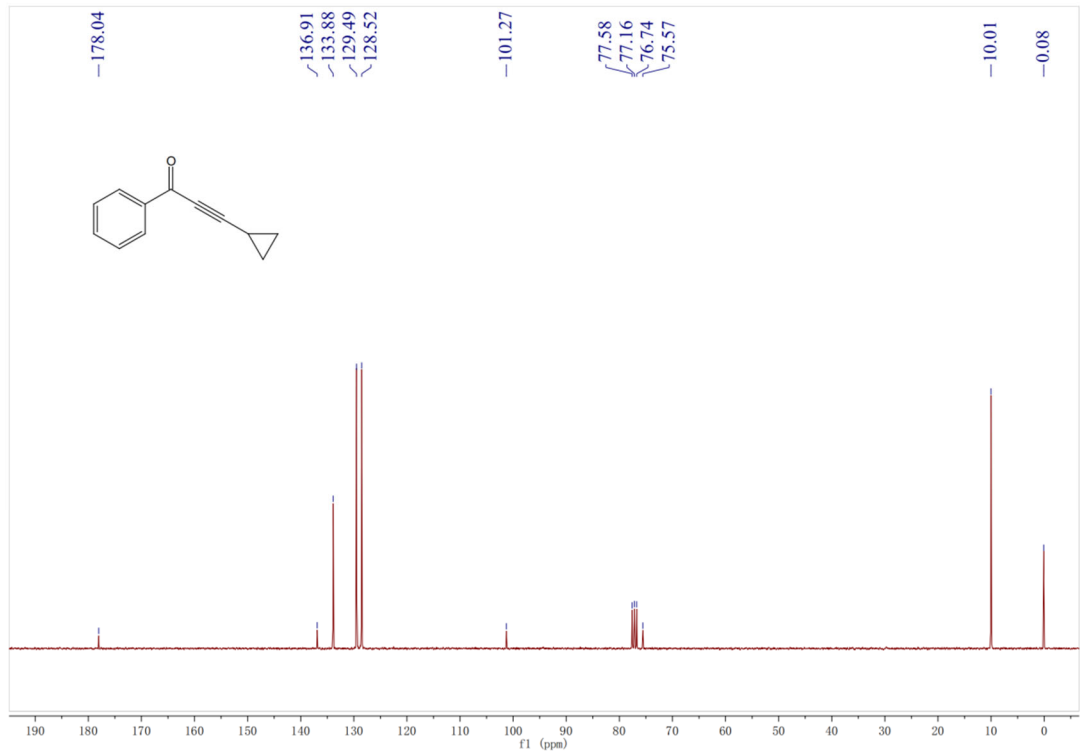

**4,4-Dimethyl-1-phenylpent-2-yn-1-one (3an)  $^1\text{H}$  NMR (300 MHz,  $\text{CDCl}_3$ )**

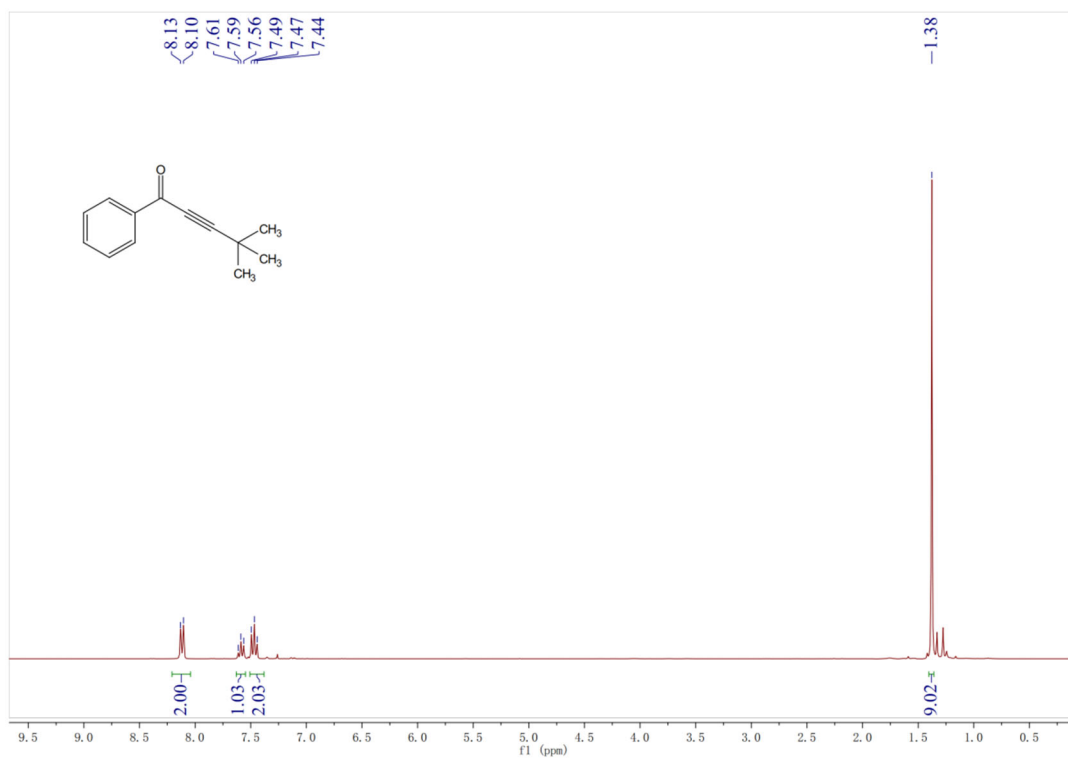

**4,4-Dimethyl-1-phenylpent-2-yn-1-one (3an)  $^{13}\text{C}$  NMR (75 MHz,  $\text{CDCl}_3$ )**

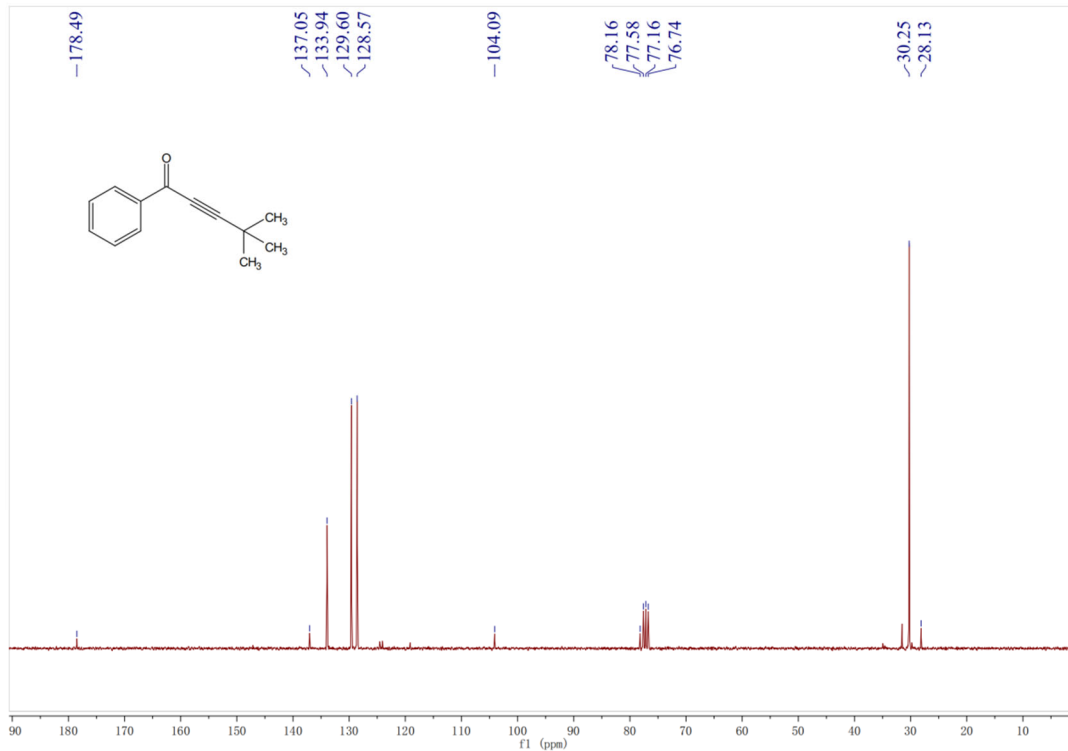

**1-Phenyl-3-(triisopropylsilyl)prop-2-yn-1-one (3ao) <sup>1</sup>H NMR (300 MHz, CDCl<sub>3</sub>)**

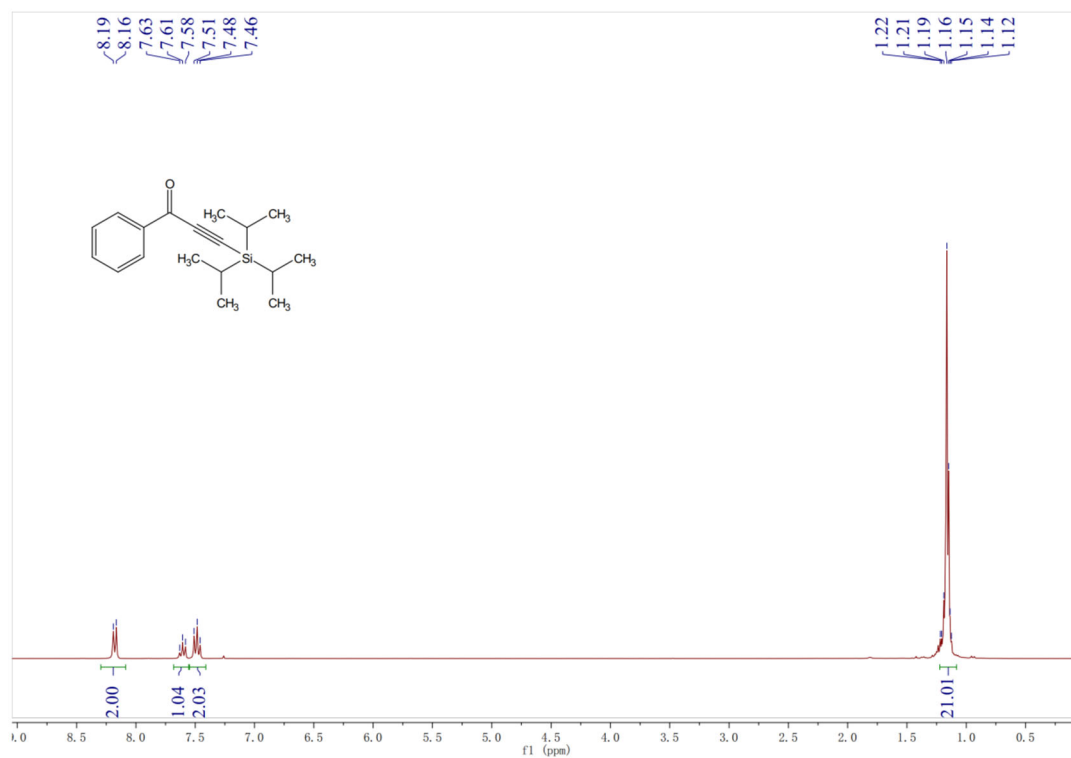

**1-Phenyl-3-(triisopropylsilyl)prop-2-yn-1-one (3ao) <sup>13</sup>C NMR (75 MHz, CDCl<sub>3</sub>)**

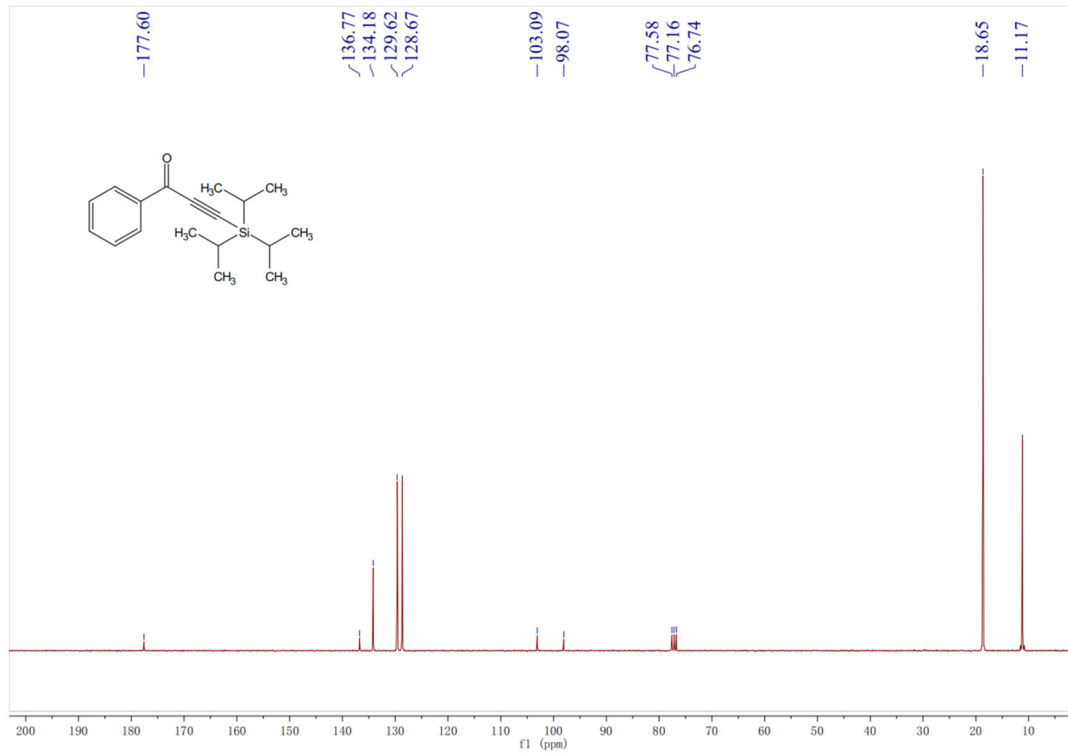



**N,N-Dipropyl-4-(3-(triisopropylsilyl)propioloyl)benzenesulfonamide (3e'o) <sup>1</sup>H**  
**NMR (300 MHz, CDCl<sub>3</sub>)**

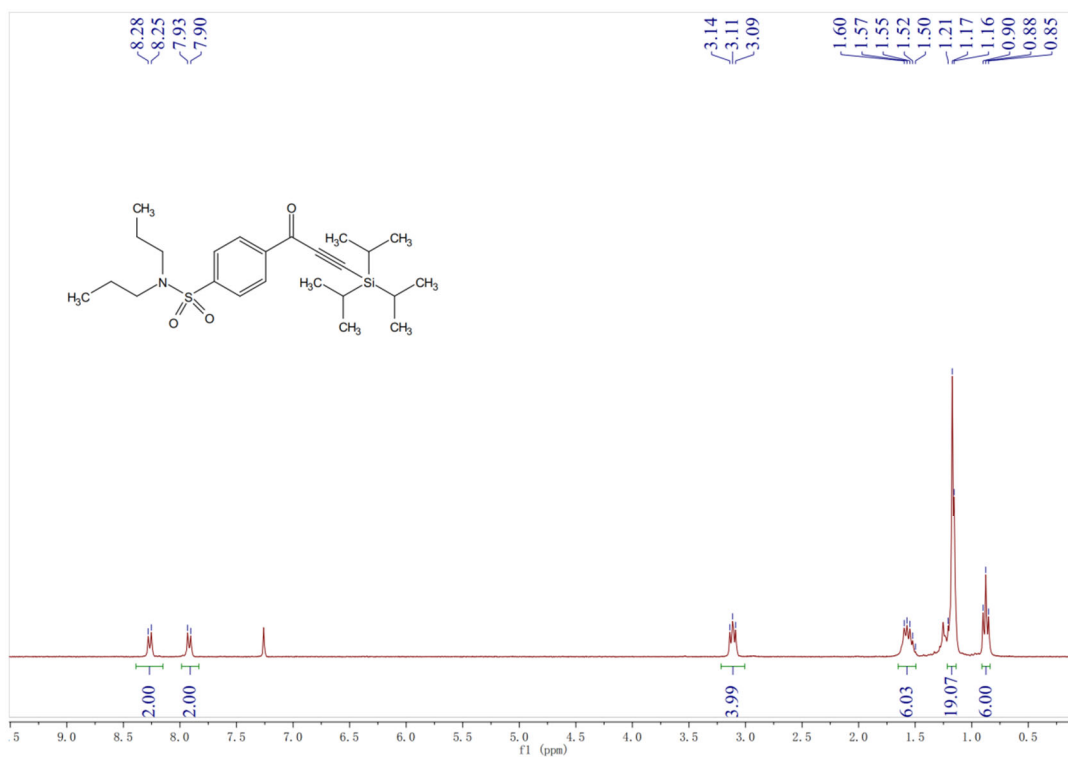

**N,N-Dipropyl-4-(3-(triisopropylsilyl)propioloyl)benzenesulfonamide (3e'o) <sup>13</sup>C**  
**NMR (75 MHz, CDCl<sub>3</sub>)**

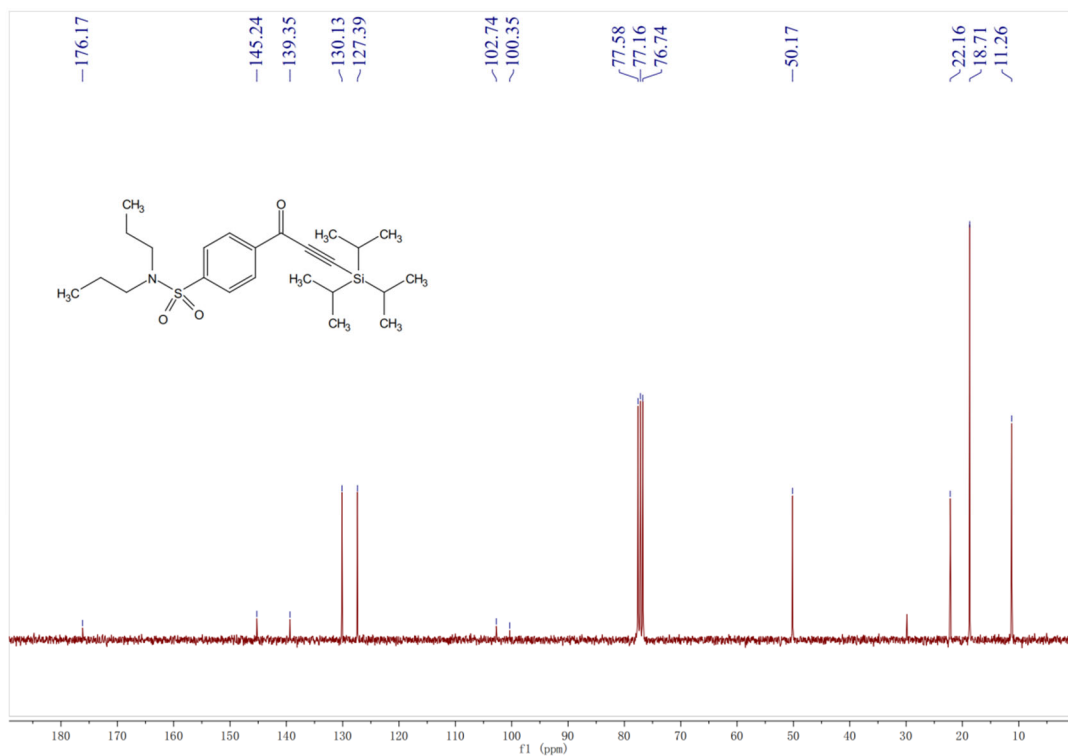

**1-(6-(3-((3*r*,5*r*,7*r*)-Adamantan-1-yl)-4-methoxyphenyl)naphthalen-2-yl)-3-(triisopropylsilyl)prop-2-yn-1-one (3f'o) <sup>1</sup>H NMR (300 MHz, CDCl<sub>3</sub>)**

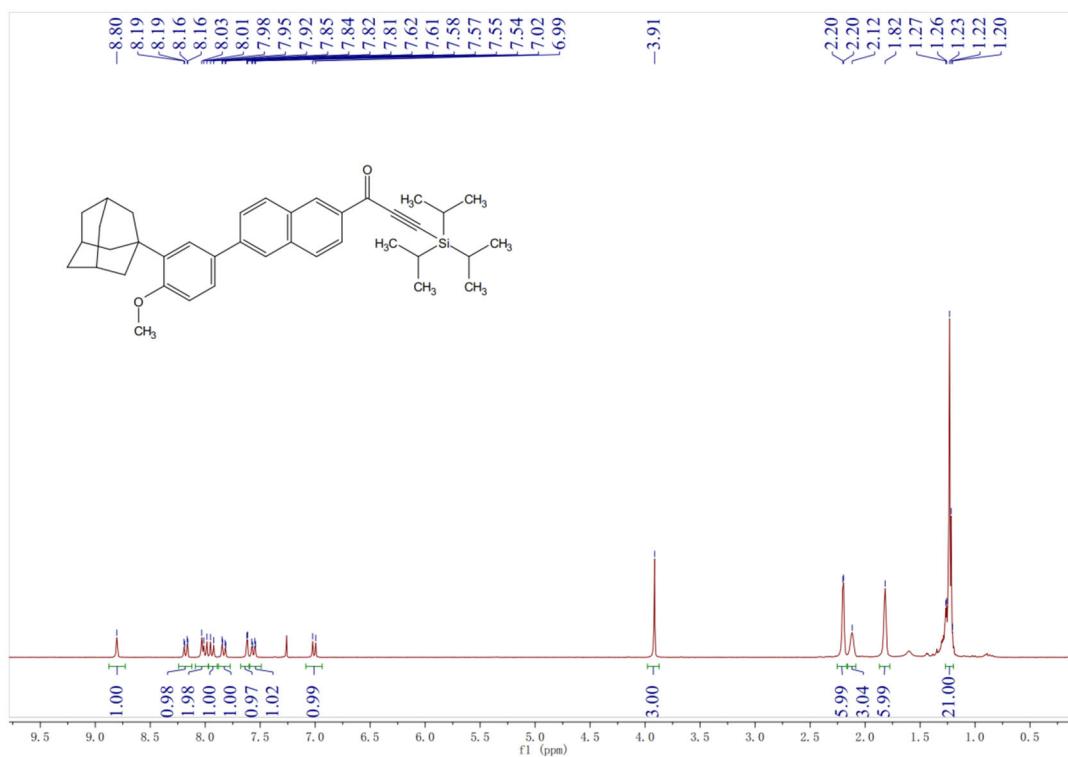

**1-(6-(3-((3*r*,5*r*,7*r*)-Adamantan-1-yl)-4-methoxyphenyl)naphthalen-2-yl)-3-(triisopropylsilyl)prop-2-yn-1-one (3f'o) <sup>13</sup>C NMR (75 MHz, CDCl<sub>3</sub>)**

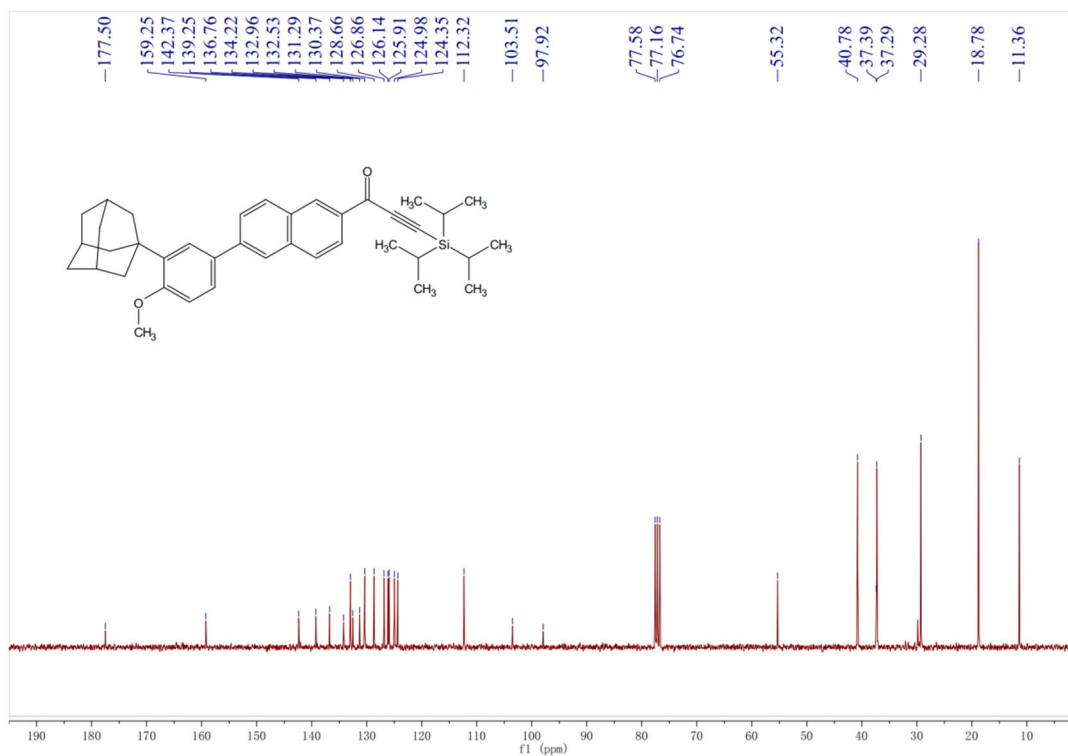

Supplement: d3nj02316h1.pdf [file d3nj02316h1.pdf]
